# Supplementary material for: RNA 3D Modules in Genome-Wide Predictions of RNA 2D Structure
Source: PubMed Central journal article supplement (PMC4624896; doi:10.1371/journal.pone.0139900), 2015-10-28
Supplement: pone.0139900.s005.pdf [file pone.0139900.s005.pdf]

# Supplementary Information 1

## Fisher’s exact test results and the estimation of the false discovery rates for ordering H.

Table A: Fisher’s exact test scheme ( $\text{FET}_{fixpscore}$ ) for  $\text{mRm}_{IL}$  models.

| # unique windows | original windows<br>RNAz                                                                                 | shuffled windows<br>RNAz                                                                                 |               |
|------------------|----------------------------------------------------------------------------------------------------------|----------------------------------------------------------------------------------------------------------|---------------|
| 3D module+       | <b>A</b><br>p-score > 0.9<br>z-score < -2<br>mRm occurrence $\geq 50\%$<br>RMDetect score $\geq Q_{0.6}$ | <b>C</b><br>p-score > 0.9<br>z-score < -2<br>mRm occurrence $\geq 50\%$<br>RMDetect score $\geq Q_{0.6}$ | A+C           |
| 3D module-       | <b>B</b><br>p-score > 0.9<br>z-score < -2<br>mRm occurrence < 50%<br>RMDetect score < $Q_{0.6}$          | <b>D</b><br>p-score > 0.9<br>z-score < -2<br>mRm occurrence < 50%<br>RMDetect score < $Q_{0.6}$          | B+D           |
|                  | A+B                                                                                                      | C+D                                                                                                      | n = (A+B+C+D) |

Table B: Fisher’s exact test scheme ( $\text{FET}_{fixpscore}$ ) for JAR3D IL and JAR3D HL models. “mied” = mean interior edit distance, “pC” = passed cutoff.

| # unique windows | original windows<br>RNAz                                                               | shuffled windows<br>RNAz                                                               |               |
|------------------|----------------------------------------------------------------------------------------|----------------------------------------------------------------------------------------|---------------|
| 3D module+       | <b>A</b><br>p-score > 0.9<br>z-score < -2<br>JAR3D mied $\leq 4$<br>JAR3D pC $\geq 50$ | <b>C</b><br>p-score > 0.9<br>z-score < -2<br>JAR3D mied $\leq 4$<br>JAR3D pC $\geq 50$ | A+C           |
| 3D module-       | <b>B</b><br>p-score > 0.9<br>z-score < -2<br>JAR3D mied $\leq 4$<br>JAR3D pC $\geq 50$ | <b>D</b><br>p-score > 0.9<br>z-score < -2<br>JAR3D mied $\leq 4$<br>JAR3D pC $\geq 50$ | B+D           |
|                  | A+B                                                                                    | C+D                                                                                    | n = (A+B+C+D) |



Table D: Results of Fisher’s exact test according to scheme shown in Table A for mRm<sub>IL</sub> module predictions of all mRm<sub>IL</sub> models together on SISSIz and original data of order H.

| Order | Model | A     | B     | C     | D     | P-value      | Odds Ratio |
|-------|-------|-------|-------|-------|-------|--------------|------------|
| H     | all   | 24956 | 87104 | 11401 | 41987 | 1.312117e-05 | 1.055145   |

Table E: Results of Fisher’s exact test according to scheme shown in Table B for JAR3D IL models for SISSIz and original data of order H. Red highlighted rows have a significant p-value after multiple testing correction using the Benjamini-Hochberg procedure at a 5% false discovery rate (adjusted p-value) and an average 3D sequence length  $\geq 9$ . “Nuc/Bp” denotes the total strand length and the number of base pairs.

| Model       | A    | B      | C   | D     | P-value      | Odds ratio | Nuc/Bp | Rank | Adj. p-value     |
|-------------|------|--------|-----|-------|--------------|------------|--------|------|------------------|
| IL_47875.1  | 548  | 111512 | 149 | 53239 | 1.119216e-10 | 1.755906   | 4/2    | 1    | 3.08903616e-08   |
| IL_96206.3  | 292  | 111768 | 63  | 53325 | 5.091232e-10 | 2.211331   | 5/4    | 2    | 7.02590016e-08   |
| IL_73000.2  | 250  | 111810 | 54  | 53334 | 8.917314e-09 | 2.20835    | 6/4    | 3    | 8.20392888e-07   |
| IL_92109.3  | 517  | 111543 | 150 | 53238 | 1.509924e-08 | 1.645044   | 4/2    | 4    | 1.04184756e-06   |
| IL_28947.2  | 318  | 111742 | 83  | 53305 | 1.729345e-07 | 1.827675   | 4/2    | 5    | 9.5459844e-06    |
| IL_97217.11 | 336  | 111724 | 92  | 53296 | 5.133559e-07 | 1.742201   | 4/2    | 6    | 2.36143714e-05   |
| IL_58586.2  | 289  | 111771 | 77  | 53311 | 1.232783e-06 | 1.790166   | 6/2    | 7    | 4.8606872571e-05 |
| IL_56465.4  | 471  | 111589 | 146 | 53242 | 1.599942e-06 | 1.539217   | 5/2    | 8    | 5.5197999e-05    |
| IL_94430.5  | 347  | 111713 | 102 | 53286 | 5.125366e-06 | 1.622697   | 5/3    | 9    | 0.00016          |
| IL_28644.1  | 152  | 111908 | 33  | 53355 | 7.520801e-06 | 2.196047   | 5/2    | 10   | 0.00021          |
| IL_39199.4  | 260  | 111800 | 72  | 53316 | 1.301343e-05 | 1.722088   | 5/4    | 11   | 0.00030          |
| IL_23448.1  | 85   | 111975 | 13  | 53375 | 1.31193e-05  | 3.116649   | 6/2    | 12   | 0.00030          |
| IL_25300.3  | 280  | 111780 | 81  | 53307 | 2.419243e-05 | 1.648511   | 4/2    | 13   | 0.00051          |
| IL_58291.4  | 121  | 111939 | 25  | 53363 | 2.799534e-05 | 2.30729    | 6/2    | 14   | 0.00055          |
| IL_67887.1  | 205  | 111855 | 55  | 53333 | 4.760893e-05 | 1.777176   | 5/3    | 15   | 0.00088          |
| IL_70173.1  | 173  | 111887 | 44  | 53344 | 5.876073e-05 | 1.874553   | 6/2    | 16   | 0.00095          |
| IL_73276.5  | 173  | 111887 | 44  | 53344 | 5.876073e-05 | 1.874553   | 7/5    | 17   | 0.00095          |
| IL_69799.1  | 115  | 111945 | 25  | 53363 | 9.534492e-05 | 2.192762   | 5/2    | 18   | 0.00145          |
| IL_92027.3  | 150  | 111910 | 37  | 53351 | 0.0001       | 1.932687   | 6/4    | 19   | 0.00145          |
| IL_44540.4  | 199  | 111861 | 55  | 53333 | 0.0001       | 1.725068   | 5/4    | 20   | 0.00167          |
| IL_46648.6  | 216  | 111844 | 62  | 53326 | 0.0002       | 1.661067   | 5/3    | 21   | 0.00210          |
| IL_02809.3  | 232  | 111828 | 69  | 53319 | 0.0002       | 1.603131   | 8/4    | 22   | 0.00287          |
| IL_23262.4  | 440  | 111620 | 154 | 53234 | 0.0004       | 1.362666   | 10/3   | 23   | 0.00529          |
| IL_01080.1  | 203  | 111857 | 60  | 53328 | 0.0005       | 1.613005   | 7/2    | 24   | 0.00544          |
| IL_40845.1  | 170  | 111890 | 48  | 53340 | 0.0005       | 1.688372   | 7/4    | 25   | 0.00607          |
| IL_87904.5  | 1115 | 110945 | 444 | 52944 | 0.0006       | 1.198378   | 10/5   | 26   | 0.00682          |
| IL_63133.1  | 52   | 112008 | 8   | 53380 | 0.0007       | 3.0977     | 6/3    | 27   | 0.00691          |
| IL_79083.3  | 631  | 111429 | 236 | 53152 | 0.0007       | 1.275334   | 11/4   | 28   | 0.00691          |
| IL_34628.2  | 54   | 112006 | 9   | 53379 | 0.0010       | 2.859419   | 12/6   | 29   | 0.00920          |
| IL_86357.3  | 76   | 111984 | 16  | 53372 | 0.0010       | 2.263858   | 6/3    | 30   | 0.00943          |
| IL_74876.2  | 846  | 111214 | 332 | 53056 | 0.0013       | 1.215622   | 10/4   | 31   | 0.01163          |
| IL_21333.2  | 238  | 111822 | 77  | 53311 | 0.0015       | 1.473584   | 8/4    | 32   | 0.01259          |
| IL_90459.3  | 476  | 111584 | 176 | 53212 | 0.0020       | 1.289691   | 6/3    | 33   | 0.01642          |
| IL_24982.5  | 1319 | 110741 | 545 | 52843 | 0.0025       | 1.154844   | 10/5   | 34   | 0.01969          |
| IL_87065.1  | 133  | 111927 | 38  | 53350 | 0.0025       | 1.66827    | 5/3    | 35   | 0.01969          |
| IL_43316.1  | 807  | 111253 | 320 | 53068 | 0.0027       | 1.202921   | 10/4   | 36   | 0.02041          |
| IL_83856.1  | 529  | 111531 | 201 | 53187 | 0.0031       | 1.255039   | 12/6   | 37   | 0.02326          |
| IL_47174.11 | 273  | 111787 | 94  | 53294 | 0.0033       | 1.384618   | 6/3    | 38   | 0.02362          |
| IL_91089.1  | 42   | 112018 | 7   | 53381 | 0.0036       | 2.859219   | 8/2    | 39   | 0.02538          |

Continued on next page

Table E – continued from previous page

| Model      | A    | B      | C    | D     | P-value | Odds ratio | Nuc/Bp | Rank | Adj. p-value |
|------------|------|--------|------|-------|---------|------------|--------|------|--------------|
| IL_88119.1 | 187  | 111873 | 60   | 53328 | 0.0038  | 1.48566    | 6/3    | 40   | 0.02606      |
| IL_63952.1 | 502  | 111558 | 191  | 53197 | 0.0041  | 1.25327    | 13/4   | 41   | 0.02731      |
| IL_39980.1 | 100  | 111960 | 27   | 53361 | 0.0042  | 1.765208   | 6/3    | 42   | 0.02731      |
| IL_80348.3 | 177  | 111883 | 57   | 53331 | 0.0050  | 1.480175   | 5/2    | 43   | 0.03172      |
| IL_80494.2 | 478  | 111582 | 182  | 53206 | 0.0051  | 1.252307   | 12/5   | 44   | 0.03172      |
| IL_43877.1 | 87   | 111973 | 23   | 53365 | 0.0058  | 1.80274    | 6/2    | 45   | 0.03553      |
| IL_68767.1 | 100  | 111960 | 28   | 53360 | 0.0064  | 1.702133   | 6/2    | 46   | 0.03832      |
| IL_37406.1 | 83   | 111977 | 22   | 53366 | 0.0071  | 1.798      | 7/2    | 47   | 0.04109      |
| IL_42251.1 | 199  | 111861 | 67   | 53321 | 0.0071  | 1.415802   | 6/3    | 48   | 0.04109      |
| IL_63253.1 | 91   | 111969 | 25   | 53363 | 0.0074  | 1.734772   | 6/2    | 49   | 0.04146      |
| IL_12147.1 | 196  | 111864 | 66   | 53322 | 0.0076  | 1.415575   | 6/3    | 50   | 0.04178      |
| IL_17212.2 | 210  | 111850 | 72   | 53316 | 0.0082  | 1.390324   | 6/3    | 51   | 0.04462      |
| IL_26971.1 | 856  | 111204 | 351  | 53037 | 0.0090  | 1.16311    | 10/3   | 52   | 0.04790      |
| IL_98421.4 | 100  | 111960 | 29   | 53359 | 0.0096  | 1.643409   | 7/2    | 53   | 0.04982      |
| IL_21639.1 | 43   | 112017 | 9    | 53379 | 0.0122  | 2.276724   | 9/3    | 54   | 0.06258      |
| IL_82444.1 | 171  | 111889 | 58   | 53330 | 0.0134  | 1.405265   | 6/3    | 55   | 0.06732      |
| IL_86059.1 | 107  | 111953 | 33   | 53355 | 0.0155  | 1.545283   | 4/2    | 56   | 0.07652      |
| IL_41791.1 | 70   | 111990 | 19   | 53369 | 0.0158  | 1.75571    | 11/8   | 57   | 0.07672      |
| IL_09587.1 | 2706 | 109354 | 1199 | 52189 | 0.0176  | 1.07709    | 11/4   | 58   | 0.08378      |
| IL_37104.3 | 192  | 111868 | 68   | 53320 | 0.0191  | 1.345827   | 6/3    | 59   | 0.08933      |
| IL_37197.1 | 654  | 111406 | 268  | 53120 | 0.0195  | 1.163558   | 11/4   | 60   | 0.08973      |
| IL_55649.1 | 391  | 111669 | 153  | 53235 | 0.0205  | 1.218264   | 8/3    | 61   | 0.09085      |
| IL_70237.3 | 922  | 111138 | 388  | 53000 | 0.0206  | 1.133208   | 10/4   | 62   | 0.09085      |
| IL_46721.1 | 92   | 111968 | 28   | 53360 | 0.0207  | 1.565851   | 10/3   | 63   | 0.09085      |
| IL_39585.1 | 1003 | 111057 | 425  | 52963 | 0.0218  | 1.125476   | 10/6   | 64   | 0.09379      |
| IL_39355.1 | 346  | 111714 | 134  | 53254 | 0.0221  | 1.230853   | 8/3    | 65   | 0.09379      |
| IL_18675.1 | 88   | 111972 | 27   | 53361 | 0.0253  | 1.553218   | 7/2    | 66   | 0.10529      |
| IL_37325.1 | 48   | 112012 | 12   | 53376 | 0.0256  | 1.906074   | 7/4    | 67   | 0.10529      |
| IL_31006.1 | 179  | 111881 | 64   | 53324 | 0.0265  | 1.333072   | 11/5   | 68   | 0.10656      |
| IL_55938.4 | 290  | 111770 | 111  | 53277 | 0.0266  | 1.245313   | 7/4    | 69   | 0.10656      |
| IL_15205.1 | 120  | 111940 | 40   | 53348 | 0.0279  | 1.42974    | 12/5   | 70   | 0.10993      |
| IL_31039.1 | 61   | 111999 | 17   | 53371 | 0.0286  | 1.7099     | 7/3    | 71   | 0.11107      |
| IL_13777.1 | 114  | 111946 | 38   | 53350 | 0.0315  | 1.429718   | 5/2    | 72   | 0.12072      |
| IL_56513.1 | 98   | 111962 | 32   | 53356 | 0.0358  | 1.459447   | 5/2    | 73   | 0.13321      |
| IL_16166.4 | 130  | 111930 | 45   | 53343 | 0.0360  | 1.376801   | 5/2    | 74   | 0.13321      |
| IL_80093.1 | 633  | 111427 | 264  | 53124 | 0.0362  | 1.143133   | 10/5   | 75   | 0.13321      |
| IL_06808.1 | 80   | 111980 | 25   | 53363 | 0.0375  | 1.524926   | 8/4    | 76   | 0.13376      |
| IL_98566.1 | 80   | 111980 | 25   | 53363 | 0.0375  | 1.524926   | 8/2    | 77   | 0.13376      |
| IL_69106.1 | 187  | 111873 | 69   | 53319 | 0.0382  | 1.291615   | 7/3    | 78   | 0.13376      |
| IL_95150.6 | 67   | 111993 | 20   | 53368 | 0.0383  | 1.59637    | 7/3    | 79   | 0.13376      |
| IL_06177.1 | 40   | 112020 | 10   | 53378 | 0.0401  | 1.90601    | 6/2    | 80   | 0.13669      |
| IL_31066.3 | 40   | 112020 | 10   | 53378 | 0.0401  | 1.90601    | 5/2    | 81   | 0.13669      |
| IL_69536.1 | 1089 | 110971 | 471  | 52917 | 0.0408  | 1.102532   | 8/3    | 82   | 0.13716      |
| IL_85510.1 | 684  | 111376 | 289  | 53099 | 0.0454  | 1.128367   | 6/2    | 83   | 0.14875      |
| IL_57364.1 | 25   | 112035 | 5    | 53383 | 0.0458  | 2.382414   | 8/4    | 84   | 0.14875      |
| IL_61730.1 | 25   | 112035 | 5    | 53383 | 0.0458  | 2.382414   | 11/3   | 85   | 0.14875      |
| IL_13959.4 | 154  | 111906 | 56   | 53332 | 0.0464  | 1.31064    | 8/4    | 86   | 0.14878      |
| IL_15840.2 | 694  | 111366 | 294  | 53094 | 0.0478  | 1.125389   | 11/6   | 87   | 0.15080      |
| IL_06471.1 | 477  | 111583 | 197  | 53191 | 0.0485  | 1.15422    | 10/7   | 88   | 0.15080      |
| IL_31663.1 | 93   | 111967 | 31   | 53357 | 0.0486  | 1.429637   | 7/4    | 89   | 0.15080      |
| IL_54450.1 | 41   | 112019 | 11   | 53377 | 0.0549  | 1.776038   | 8/3    | 90   | 0.16840      |
| IL_25271.2 | 27   | 112033 | 6    | 53382 | 0.0563  | 2.144171   | 14/7   | 91   | 0.17079      |
| IL_41766.6 | 336  | 111724 | 136  | 53252 | 0.0585  | 1.177564   | 8/4    | 92   | 0.17545      |
| IL_05723.1 | 473  | 111587 | 197  | 53191 | 0.0599  | 1.144501   | 10/5   | 93   | 0.17771      |
| IL_80714.1 | 463  | 111597 | 193  | 53195 | 0.0632  | 1.143507   | 12/3   | 94   | 0.18556      |
| IL_65553.8 | 107  | 111953 | 38   | 53350 | 0.0685  | 1.341875   | 12/7   | 95   | 0.19891      |
| IL_50911.1 | 34   | 112026 | 9    | 53379 | 0.0731  | 1.800058   | 7/3    | 96   | 0.21009      |
| IL_05684.1 | 223  | 111837 | 88   | 53300 | 0.0738  | 1.207692   | 8/3    | 97   | 0.21009      |
| IL_97296.1 | 209  | 111851 | 82   | 53306 | 0.0750  | 1.214676   | 7/3    | 98   | 0.21123      |

Continued on next page

Table E – continued from previous page

| Model      | A    | B      | C   | D     | P-value | Odds ratio | Nuc/Bp | Rank | Adj. p-value |
|------------|------|--------|-----|-------|---------|------------|--------|------|--------------|
| IL_12211.1 | 127  | 111933 | 47  | 53341 | 0.0788  | 1.287636   | 12/6   | 99   | 0.21948      |
| IL_90133.3 | 141  | 111919 | 53  | 53335 | 0.0795  | 1.267764   | 7/3    | 100  | 0.21948      |
| IL_34363.2 | 19   | 112041 | 4   | 53384 | 0.0920  | 2.263215   | 13/9   | 101  | 0.25133      |
| IL_06847.1 | 6    | 112054 | 0   | 53388 | 0.0965  | Inf        | 11/4   | 102  | 0.25869      |
| IL_46435.1 | 6    | 112054 | 0   | 53388 | 0.0965  | Inf        | 13/2   | 103  | 0.25869      |
| IL_20775.1 | 62   | 111998 | 21  | 53367 | 0.1057  | 1.406828   | 7/3    | 104  | 0.28056      |
| IL_17603.1 | 338  | 111722 | 142 | 53246 | 0.1123  | 1.13442    | 11/5   | 105  | 0.29522      |
| IL_30381.1 | 66   | 111994 | 23  | 53365 | 0.1170  | 1.367377   | 8/4    | 106  | 0.30209      |
| IL_80505.1 | 9    | 112051 | 1   | 53387 | 0.1171  | 4.288512   | 11/2   | 107  | 0.30209      |
| IL_79955.2 | 357  | 111703 | 151 | 53237 | 0.1183  | 1.126776   | 12/6   | 108  | 0.30239      |
| IL_17066.1 | 65   | 111995 | 23  | 53365 | 0.1312  | 1.346655   | 6/3    | 109  | 0.33217      |
| IL_13069.3 | 79   | 111981 | 29  | 53359 | 0.1346  | 1.298003   | 4/2    | 110  | 0.33784      |
| IL_87548.1 | 407  | 111653 | 175 | 53213 | 0.1370  | 1.108414   | 11/6   | 111  | 0.34061      |
| IL_93424.4 | 606  | 111454 | 266 | 53122 | 0.1397  | 1.085847   | 9/4    | 112  | 0.34423      |
| IL_28572.2 | 5    | 112055 | 0   | 53388 | 0.1425  | Inf        | 15/5   | 113  | 0.34767      |
| IL_00998.1 | 97   | 111963 | 37  | 53351 | 0.1439  | 1.249185   | 8/4    | 114  | 0.34767      |
| IL_97509.1 | 703  | 111357 | 311 | 53077 | 0.1449  | 1.077415   | 10/5   | 115  | 0.34767      |
| IL_77263.2 | 279  | 111781 | 118 | 53270 | 0.1508  | 1.126768   | 10/5   | 116  | 0.35876      |
| IL_41139.1 | 54   | 112006 | 19  | 53369 | 0.1547  | 1.354253   | 7/2    | 117  | 0.36493      |
| IL_50521.1 | 49   | 112011 | 17  | 53371 | 0.1586  | 1.373415   | 14/7   | 118  | 0.37092      |
| IL_22909.1 | 98   | 111962 | 38  | 53350 | 0.1616  | 1.228844   | 9/3    | 119  | 0.37470      |
| IL_11751.1 | 34   | 112026 | 11  | 53377 | 0.1680  | 1.472721   | 7/2    | 120  | 0.38635      |
| IL_06211.3 | 129  | 111931 | 52  | 53336 | 0.1740  | 1.182091   | 7/2    | 121  | 0.39687      |
| IL_57785.5 | 48   | 112012 | 17  | 53371 | 0.1789  | 1.345383   | 8/4    | 122  | 0.40429      |
| IL_53635.3 | 99   | 111961 | 39  | 53349 | 0.1802  | 1.209546   | 11/5   | 123  | 0.40429      |
| IL_09491.1 | 31   | 112029 | 10  | 53378 | 0.1818  | 1.477041   | 7/2    | 124  | 0.40458      |
| IL_43124.2 | 173  | 111887 | 72  | 53316 | 0.1853  | 1.144955   | 7/4    | 125  | 0.40915      |
| IL_64589.1 | 57   | 112003 | 21  | 53367 | 0.1878  | 1.29325    | 7/2    | 126  | 0.41147      |
| IL_41153.1 | 28   | 112032 | 9   | 53379 | 0.1971  | 1.482323   | 7/3    | 127  | 0.42842      |
| IL_08926.3 | 100  | 111960 | 40  | 53348 | 0.1997  | 1.191212   | 5/3    | 128  | 0.43067      |
| IL_93568.2 | 196  | 111864 | 83  | 53305 | 0.2020  | 1.125261   | 12/5   | 129  | 0.43213      |
| IL_77014.1 | 4    | 112056 | 0   | 53388 | 0.2104  | Inf        | 11/5   | 130  | 0.44657      |
| IL_47758.2 | 115  | 111945 | 47  | 53341 | 0.2121  | 1.165875   | 8/4    | 131  | 0.44657      |
| IL_46306.1 | 1144 | 110916 | 522 | 52866 | 0.2136  | 1.04457    | 9/3    | 132  | 0.44657      |
| IL_85647.3 | 15   | 112045 | 4   | 53384 | 0.2154  | 1.786687   | 15/8   | 133  | 0.44690      |
| IL_88865.1 | 27   | 112033 | 9   | 53379 | 0.2283  | 1.429385   | 8/3    | 134  | 0.47013      |
| IL_24546.4 | 127  | 111933 | 53  | 53335 | 0.2337  | 1.141771   | 10/3   | 135  | 0.47783      |
| IL_87507.1 | 204  | 111856 | 88  | 53300 | 0.2378  | 1.104623   | 9/4    | 136  | 0.48250      |
| IL_23639.1 | 1153 | 110907 | 529 | 52859 | 0.2440  | 1.038788   | 9/4    | 137  | 0.49152      |
| IL_47444.3 | 718  | 111342 | 326 | 53062 | 0.2458  | 1.049618   | 12/6   | 138  | 0.49166      |
| IL_21254.1 | 38   | 112022 | 14  | 53374 | 0.2527  | 1.2932     | 12/7   | 139  | 0.50174      |
| IL_25380.1 | 165  | 111895 | 71  | 53317 | 0.2599  | 1.107335   | 8/4    | 140  | 0.51241      |
| IL_71685.1 | 74   | 111986 | 30  | 53358 | 0.2630  | 1.17528    | 14/7   | 141  | 0.51472      |
| IL_78744.1 | 21   | 112039 | 7   | 53381 | 0.2729  | 1.429362   | 12/6   | 142  | 0.52812      |
| IL_11778.1 | 35   | 112025 | 13  | 53375 | 0.2736  | 1.282722   | 7/2    | 143  | 0.52812      |
| IL_11302.1 | 842  | 111218 | 386 | 53002 | 0.2757  | 1.039527   | 10/3   | 144  | 0.52842      |
| IL_70299.1 | 82   | 111978 | 34  | 53354 | 0.2829  | 1.149121   | 10/4   | 145  | 0.53222      |
| IL_39526.4 | 6    | 112054 | 1   | 53387 | 0.2835  | 2.858622   | 9/2    | 146  | 0.53222      |
| IL_98591.3 | 6    | 112054 | 1   | 53387 | 0.2835  | 2.858622   | 13/8   | 147  | 0.53222      |
| IL_07300.2 | 125  | 111935 | 54  | 53334 | 0.3034  | 1.102943   | 9/4    | 148  | 0.56309      |
| IL_09333.1 | 307  | 111753 | 138 | 53250 | 0.3040  | 1.060033   | 12/6   | 149  | 0.56309      |
| IL_43946.1 | 13   | 112047 | 4   | 53384 | 0.3137  | 1.548436   | 12/6   | 150  | 0.57372      |
| IL_31555.5 | 593  | 111467 | 272 | 53116 | 0.3157  | 1.038862   | 9/4    | 151  | 0.57372      |
| IL_75328.1 | 20   | 112040 | 7   | 53381 | 0.3160  | 1.361309   | 14/4   | 152  | 0.57372      |
| IL_09530.1 | 656  | 111404 | 302 | 53086 | 0.3240  | 1.03506    | 8/3    | 153  | 0.57844      |
| IL_91379.1 | 8    | 112052 | 2   | 53386 | 0.3246  | 1.905751   | 12/2   | 154  | 0.57844      |
| IL_06421.1 | 102  | 111958 | 44  | 53344 | 0.3249  | 1.104527   | 7/4    | 155  | 0.57844      |
| IL_99397.1 | 15   | 112045 | 5   | 53383 | 0.3332  | 1.429339   | 9/4    | 156  | 0.58949      |
| IL_06468.1 | 244  | 111816 | 110 | 53278 | 0.3376  | 1.056917   | 10/4   | 157  | 0.59271      |

Continued on next page

Table E – continued from previous page

| Model      | A    | B      | C    | D     | P-value | Odds ratio | Nuc/Bp | Rank | Adj. p-value |
|------------|------|--------|------|-------|---------|------------|--------|------|--------------|
| IL_06306.1 | 33   | 112027 | 13   | 53375 | 0.3418  | 1.209423   | 13/2   | 158  | 0.59271      |
| IL_91044.1 | 338  | 111722 | 154  | 53234 | 0.3421  | 1.045794   | 8/3    | 159  | 0.59271      |
| IL_22732.1 | 166  | 111894 | 74   | 53314 | 0.3446  | 1.068834   | 9/5    | 160  | 0.59271      |
| IL_31224.1 | 282  | 111778 | 128  | 53260 | 0.3457  | 1.049745   | 7/2    | 161  | 0.59271      |
| IL_59529.1 | 491  | 111569 | 226  | 53162 | 0.3499  | 1.035191   | 10/5   | 162  | 0.59612      |
| IL_37347.1 | 14   | 112046 | 5    | 53383 | 0.3893  | 1.334071   | 15/7   | 163  | 0.65923      |
| IL_40892.1 | 98   | 111962 | 44   | 53344 | 0.4102  | 1.061177   | 8/3    | 164  | 0.69026      |
| IL_47732.1 | 18   | 112042 | 7    | 53381 | 0.4140  | 1.225099   | 6/2    | 165  | 0.69089      |
| IL_83920.1 | 57   | 112003 | 25   | 53363 | 0.4155  | 1.086287   | 7/3    | 166  | 0.69089      |
| IL_54966.1 | 282  | 111778 | 131  | 53257 | 0.4284  | 1.025669   | 9/5    | 167  | 0.70799      |
| IL_52958.1 | 2612 | 109448 | 1237 | 52151 | 0.4381  | 1.00614    | 9/2    | 168  | 0.71966      |
| IL_30067.1 | 268  | 111792 | 125  | 53263 | 0.4459  | 1.021518   | 10/5   | 169  | 0.72829      |
| IL_25082.1 | 2    | 112058 | 0    | 53388 | 0.4588  | Inf        | 17/6   | 170  | 0.73188      |
| IL_82601.1 | 2    | 112058 | 0    | 53388 | 0.4588  | Inf        | 8/4    | 171  | 0.73188      |
| IL_94403.5 | 2    | 112058 | 0    | 53388 | 0.4588  | Inf        | 11/3   | 172  | 0.73188      |
| IL_94744.1 | 2    | 112058 | 0    | 53388 | 0.4588  | Inf        | 17/8   | 173  | 0.73188      |
| IL_45262.4 | 140  | 111920 | 65   | 53323 | 0.4647  | 1.026198   | 9/3    | 174  | 0.73383      |
| IL_58454.1 | 570  | 111490 | 269  | 53119 | 0.4653  | 1.009573   | 9/3    | 175  | 0.73383      |
| IL_86336.1 | 283  | 111777 | 133  | 53255 | 0.4716  | 1.013784   | 9/2    | 176  | 0.73921      |
| IL_06180.1 | 899  | 111161 | 426  | 52962 | 0.4764  | 1.005455   | 9/4    | 177  | 0.73921      |
| IL_38807.3 | 57   | 112003 | 26   | 53362 | 0.4791  | 1.044486   | 11/6   | 178  | 0.73921      |
| IL_09882.1 | 97   | 111963 | 45   | 53343 | 0.4812  | 1.027004   | 12/6   | 179  | 0.73921      |
| IL_02835.1 | 4    | 112056 | 1    | 53387 | 0.4821  | 1.905719   | 13/4   | 180  | 0.73921      |
| IL_28003.1 | 61   | 111999 | 28   | 53360 | 0.4856  | 1.037924   | 8/4    | 181  | 0.74040      |
| IL_35043.1 | 6    | 112054 | 2    | 53386 | 0.4946  | 1.429304   | 10/3   | 182  | 0.74844      |
| IL_52509.1 | 497  | 111563 | 236  | 53152 | 0.5009  | 1.00333    | 10/4   | 183  | 0.74844      |
| IL_21077.1 | 159  | 111901 | 75   | 53313 | 0.5028  | 1.010035   | 8/2    | 184  | 0.74844      |
| IL_71942.1 | 8    | 112052 | 3    | 53385 | 0.5032  | 1.270442   | 10/2   | 185  | 0.74844      |
| IL_97057.3 | 675  | 111385 | 321  | 53067 | 0.5044  | 1.001836   | 11/5   | 186  | 0.74844      |
| IL_70401.1 | 10   | 112050 | 4    | 53384 | 0.5100  | 1.191058   | 11/3   | 187  | 0.75267      |
| IL_97191.1 | 14   | 112046 | 6    | 53382 | 0.5203  | 1.111664   | 13/7   | 188  | 0.76387      |
| IL_33842.1 | 26   | 112034 | 12   | 53376 | 0.5410  | 1.032227   | 7/4    | 189  | 0.78381      |
| IL_87394.1 | 26   | 112034 | 12   | 53376 | 0.5410  | 1.032227   | 10/2   | 190  | 0.78381      |
| IL_83250.1 | 111  | 111949 | 53   | 53335 | 0.5424  | 0.9977901  | 11/5   | 191  | 0.78381      |
| IL_03110.1 | 361  | 111699 | 173  | 53215 | 0.5459  | 0.9941362  | 13/5   | 192  | 0.78468      |
| IL_52173.1 | 163  | 111897 | 79   | 53309 | 0.5799  | 0.9829654  | 9/2    | 193  | 0.82890      |
| IL_80652.1 | 15   | 112045 | 7    | 53381 | 0.5826  | 1.020924   | 13/6   | 194  | 0.82890      |
| IL_54954.1 | 3    | 112057 | 1    | 53387 | 0.6115  | 1.429293   | 16/7   | 195  | 0.86111      |
| IL_86981.1 | 3    | 112057 | 1    | 53387 | 0.6115  | 1.429293   | 15/8   | 196  | 0.86111      |
| IL_46034.3 | 81   | 111979 | 40   | 53348 | 0.6154  | 0.9647518  | 8/3    | 197  | 0.86217      |
| IL_45794.1 | 40   | 112020 | 20   | 53368 | 0.6289  | 0.9528306  | 11/5   | 198  | 0.87662      |
| IL_57977.1 | 60   | 112000 | 30   | 53358 | 0.6333  | 0.9528222  | 11/4   | 199  | 0.87828      |
| IL_91078.1 | 12   | 112048 | 6    | 53382 | 0.6458  | 0.9528424  | 12/4   | 200  | 0.89116      |
| IL_49527.1 | 742  | 111318 | 362  | 53026 | 0.6580  | 0.9763611  | 10/4   | 201  | 0.89224      |
| IL_82563.1 | 43   | 112017 | 22   | 53366 | 0.6618  | 0.9311666  | 10/3   | 202  | 0.89224      |
| IL_48918.3 | 73   | 111987 | 37   | 53351 | 0.6623  | 0.9399326  | 12/6   | 203  | 0.89224      |
| IL_82188.2 | 221  | 111839 | 110  | 53278 | 0.6700  | 0.9570945  | 14/3   | 204  | 0.89224      |
| IL_97833.1 | 25   | 112035 | 13   | 53375 | 0.6721  | 0.9161831  | 14/8   | 205  | 0.89224      |
| IL_05513.1 | 1    | 112059 | 0    | 53388 | 0.6773  | Inf        | 12/3   | 206  | 0.89224      |
| IL_27668.1 | 1    | 112059 | 0    | 53388 | 0.6773  | Inf        | 11/3   | 207  | 0.89224      |
| IL_42891.1 | 1    | 112059 | 0    | 53388 | 0.6773  | Inf        | 14/3   | 208  | 0.89224      |
| IL_46301.1 | 245  | 111815 | 122  | 53266 | 0.6774  | 0.9566577  | 9/3    | 209  | 0.89224      |
| IL_26868.1 | 388  | 111672 | 192  | 53196 | 0.6841  | 0.9626581  | 10/5   | 210  | 0.89224      |
| IL_12507.1 | 78   | 111982 | 40   | 53348 | 0.6865  | 0.9289781  | 11/4   | 211  | 0.89224      |
| IL_24293.1 | 70   | 111990 | 36   | 53352 | 0.6866  | 0.9263349  | 8/3    | 212  | 0.89224      |
| IL_49493.4 | 104  | 111956 | 53   | 53335 | 0.6887  | 0.9348096  | 13/7   | 213  | 0.89224      |
| IL_87523.1 | 124  | 111936 | 63   | 53325 | 0.6918  | 0.9376546  | 10/3   | 214  | 0.89224      |
| IL_75415.1 | 4    | 112056 | 2    | 53386 | 0.7012  | 0.9528458  | 10/2   | 215  | 0.90019      |
| IL_65137.1 | 89   | 111971 | 46   | 53342 | 0.7083  | 0.921716   | 12/6   | 216  | 0.90505      |

Continued on next page

Table E – continued from previous page

| Model      | A    | B      | C    | D     | P-value | Odds ratio | Nuc/Bp | Rank | Adj. p-value |
|------------|------|--------|------|-------|---------|------------|--------|------|--------------|
| IL_92321.4 | 469  | 111591 | 233  | 53155 | 0.7148  | 0.9588144  | 12/6   | 217  | 0.90910      |
| IL_16415.2 | 14   | 112046 | 8    | 53380 | 0.7434  | 0.8337358  | 14/7   | 218  | 0.93792      |
| IL_03282.1 | 105  | 111955 | 55   | 53333 | 0.7455  | 0.9094543  | 10/5   | 219  | 0.93792      |
| IL_89794.1 | 25   | 112035 | 14   | 53374 | 0.7476  | 0.850735   | 11/7   | 220  | 0.93792      |
| IL_27640.1 | 2    | 112058 | 1    | 53387 | 0.7548  | 0.9528466  | 15/4   | 221  | 0.94267      |
| IL_54470.1 | 321  | 111739 | 163  | 53225 | 0.7628  | 0.9380565  | 8/4    | 222  | 0.94518      |
| IL_53988.1 | 94   | 111966 | 50   | 53338 | 0.7655  | 0.8955935  | 12/5   | 223  | 0.94518      |
| IL_82650.1 | 10   | 112050 | 6    | 53382 | 0.7671  | 0.7940454  | 13/5   | 224  | 0.94518      |
| IL_95652.3 | 26   | 112034 | 15   | 53373 | 0.7783  | 0.8257775  | 14/7   | 225  | 0.95468      |
| IL_37053.1 | 228  | 111832 | 118  | 53270 | 0.7855  | 0.9203875  | 12/6   | 226  | 0.95934      |
| IL_44067.4 | 13   | 112047 | 8    | 53380 | 0.7921  | 0.7741915  | 14/6   | 227  | 0.96127      |
| IL_85805.1 | 919  | 111141 | 458  | 52930 | 0.7941  | 0.955604   | 8/2    | 228  | 0.96127      |
| IL_78513.1 | 18   | 112042 | 11   | 53377 | 0.8043  | 0.7795948  | 8/2    | 229  | 0.96393      |
| IL_76486.1 | 3    | 112057 | 2    | 53386 | 0.8056  | 0.7146099  | 15/8   | 230  | 0.96393      |
| IL_31754.1 | 6    | 112054 | 4    | 53384 | 0.8082  | 0.7146022  | 13/7   | 231  | 0.96393      |
| IL_66744.1 | 74   | 111986 | 41   | 53347 | 0.8103  | 0.8598041  | 13/3   | 232  | 0.96393      |
| IL_96446.1 | 112  | 111948 | 61   | 53327 | 0.8225  | 0.8746273  | 10/3   | 233  | 0.97156      |
| IL_81398.1 | 3139 | 108921 | 1538 | 51850 | 0.8237  | 0.971539   | 10/4   | 234  | 0.97156      |
| IL_92114.3 | 69   | 111991 | 39   | 53349 | 0.8311  | 0.8428199  | 9/4    | 235  | 0.97610      |
| IL_59934.1 | 82   | 111978 | 46   | 53342 | 0.8373  | 0.8491786  | 12/5   | 236  | 0.97646      |
| IL_60649.1 | 46   | 112014 | 27   | 53361 | 0.8385  | 0.8116276  | 11/5   | 237  | 0.97646      |
| IL_72158.3 | 118  | 111942 | 65   | 53323 | 0.8461  | 0.8647589  | 12/6   | 238  | 0.98122      |
| IL_31707.1 | 8    | 112052 | 6    | 53382 | 0.8703  | 0.6351977  | 11/4   | 239  | 1.00000      |
| IL_62499.7 | 462  | 111598 | 242  | 53146 | 0.8918  | 0.9091647  | 7/4    | 240  | 1.00000      |
| IL_05221.1 | 3    | 112057 | 3    | 53385 | 0.9100  | 0.4764001  | 15/11  | 241  | 1.00000      |
| IL_25307.1 | 55   | 112005 | 35   | 53353 | 0.9256  | 0.7485168  | 9/3    | 242  | 1.00000      |
| IL_46990.1 | 1716 | 110344 | 870  | 52518 | 0.9363  | 0.9387677  | 10/2   | 243  | 1.00000      |
| IL_98924.1 | 398  | 111662 | 215  | 53173 | 0.9364  | 0.8815234  | 9/3    | 244  | 1.00000      |
| IL_90735.1 | 19   | 112041 | 15   | 53373 | 0.9488  | 0.6033948  | 16/3   | 245  | 1.00000      |
| IL_52940.1 | 226  | 111834 | 129  | 53259 | 0.9542  | 0.8343456  | 14/6   | 246  | 1.00000      |
| IL_94973.1 | 12   | 112048 | 11   | 53377 | 0.9623  | 0.5196644  | 14/6   | 247  | 1.00000      |
| IL_27243.1 | 1    | 112059 | 2    | 53386 | 0.9664  | 0.2382086  | 14/7   | 248  | 1.00000      |
| IL_47687.1 | 226  | 111834 | 133  | 53255 | 0.9760  | 0.8091979  | 13/6   | 249  | 1.00000      |
| IL_30840.2 | 2289 | 109771 | 1171 | 52217 | 0.9781  | 0.9298526  | 11/5   | 250  | 1.00000      |
| IL_53323.1 | 989  | 111071 | 528  | 52860 | 0.9838  | 0.891439   | 10/3   | 251  | 1.00000      |
| IL_25181.1 | 1011 | 111049 | 540  | 52848 | 0.9851  | 0.8909926  | 13/5   | 252  | 1.00000      |
| IL_68827.1 | 26   | 112034 | 23   | 53365 | 0.9890  | 0.5384348  | 11/4   | 253  | 1.00000      |
| IL_49976.1 | 1036 | 111024 | 589  | 52799 | 0.9997  | 0.8364907  | 8/5    | 254  | 1.00000      |
| IL_02359.3 | 0    | 112060 | 0    | 53388 | 1.0000  | 0          | 16/9   | 255  | 1.00000      |
| IL_16330.1 | 0    | 112060 | 0    | 53388 | 1.0000  | 0          | 25/5   | 256  | 1.00000      |
| IL_17682.1 | 0    | 112060 | 1    | 53387 | 1.0000  | 0          | 17/8   | 257  | 1.00000      |
| IL_21421.1 | 0    | 112060 | 0    | 53388 | 1.0000  | 0          | 20/7   | 258  | 1.00000      |
| IL_21495.1 | 0    | 112060 | 0    | 53388 | 1.0000  | 0          | 14/5   | 259  | 1.00000      |
| IL_23414.1 | 0    | 112060 | 0    | 53388 | 1.0000  | 0          | 21/5   | 260  | 1.00000      |
| IL_25230.3 | 0    | 112060 | 0    | 53388 | 1.0000  | 0          | 18/8   | 261  | 1.00000      |
| IL_33964.1 | 0    | 112060 | 0    | 53388 | 1.0000  | 0          | 20/6   | 262  | 1.00000      |
| IL_39324.1 | 0    | 112060 | 0    | 53388 | 1.0000  | 0          | 18/10  | 263  | 1.00000      |
| IL_40527.1 | 0    | 112060 | 0    | 53388 | 1.0000  | 0          | 15/5   | 264  | 1.00000      |
| IL_52610.1 | 0    | 112060 | 0    | 53388 | 1.0000  | 0          | 36/9   | 265  | 1.00000      |
| IL_57285.1 | 0    | 112060 | 0    | 53388 | 1.0000  | 0          | 13/4   | 266  | 1.00000      |
| IL_76095.3 | 0    | 112060 | 0    | 53388 | 1.0000  | 0          | 18/8   | 267  | 1.00000      |
| IL_76263.1 | 0    | 112060 | 0    | 53388 | 1.0000  | 0          | 17/3   | 268  | 1.00000      |
| IL_77076.1 | 0    | 112060 | 0    | 53388 | 1.0000  | 0          | 18/8   | 269  | 1.00000      |
| IL_77296.1 | 0    | 112060 | 0    | 53388 | 1.0000  | 0          | 14/2   | 270  | 1.00000      |
| IL_88367.1 | 0    | 112060 | 0    | 53388 | 1.0000  | 0          | 15/7   | 271  | 1.00000      |
| IL_89028.6 | 0    | 112060 | 0    | 53388 | 1.0000  | 0          | 13/5   | 272  | 1.00000      |
| IL_90057.1 | 0    | 112060 | 0    | 53388 | 1.0000  | 0          | 23/17  | 273  | 1.00000      |
| IL_91904.1 | 0    | 112060 | 0    | 53388 | 1.0000  | 0          | 13/4   | 274  | 1.00000      |
| IL_97842.1 | 0    | 112060 | 0    | 53388 | 1.0000  | 0          | 16/5   | 275  | 1.00000      |

Continued on next page

Table E – continued from previous page

| Model      | A | B      | C | D     | P-value | Odds ratio | Nuc/Bp | Rank | Adj. p-value |
|------------|---|--------|---|-------|---------|------------|--------|------|--------------|
| IL_98655.1 | 0 | 112060 | 0 | 53388 | 1.0000  | 0          | 13/5   | 276  | 1.00000      |

Table F: Results of Fisher’s exact test according to scheme shown in Table B for JAR3D IL module predictions from all JAR3D IL models with mean interior edit distance  $\leq 4$ , passed cutoff  $\geq 50$ , and mean sequence length  $\geq 9$ .

| Order | Model | A     | B     | C    | D     | P-value      | Odds ratio |
|-------|-------|-------|-------|------|-------|--------------|------------|
| H     | all   | 20309 | 88776 | 9324 | 43117 | 2.311515e-05 | 1.057894   |

Table G: Results of Fisher’s exact test according to scheme shown in Table B for JAR3D HL models for SISSIz and original data of order H. Brown highlighted rows have a significant p-value after multiple testing correction using the Benjamini-Hochberg procedure at a 5% false discovery rate (adjusted p-value). “Nuc/Bp” denotes the total strand length and the number of base pairs.

| Model      | A     | B      | C    | D     | P-value      | Odds ratio | Nuc/Bp | Rank | Adj. p-value          |
|------------|-------|--------|------|-------|--------------|------------|--------|------|-----------------------|
| HL_75759.4 | 5748  | 106312 | 2287 | 51101 | 2.237763e-14 | 1.208056   | 3/1    | 1    | 5.66154039e-12        |
| HL_35865.1 | 5930  | 106130 | 2436 | 50952 | 9.595822e-11 | 1.168675   | 5/1    | 2    | 1.213871483e-08       |
| HL_06643.3 | 5389  | 106671 | 2233 | 51155 | 5.498795e-09 | 1.157326   | 5/2    | 3    | 4.046182195e-07       |
| HL_87554.1 | 1892  | 110168 | 705  | 52683 | 6.397126e-09 | 1.283306   | 5/1    | 4    | 4.046182195e-07       |
| HL_90542.1 | 1019  | 111041 | 358  | 53030 | 2.095358e-07 | 1.359375   | 7/2    | 5    | 1.060251148e-05       |
| HL_74559.1 | 2813  | 109247 | 1138 | 52250 | 1.050563e-06 | 1.182218   | 4/1    | 6    | 4.429873983333333e-05 |
| HL_10378.1 | 1741  | 110319 | 674  | 52714 | 1.656569e-06 | 1.234251   | 4/1    | 7    | 5.98731367142857e-05  |
| HL_42677.2 | 4580  | 107480 | 1935 | 51453 | 2.808353e-06 | 1.133089   | 3/1    | 8    | 8.573619022222222e-05 |
| HL_97499.1 | 2075  | 109985 | 823  | 52565 | 3.049904e-06 | 1.204962   | 4/1    | 9    | 8.573619022222222e-05 |
| HL_30008.1 | 2025  | 110035 | 807  | 52581 | 6.625207e-06 | 1.199062   | 5/1    | 10   | 0.00017               |
| HL_63941.1 | 4447  | 107613 | 1903 | 51485 | 3.062551e-05 | 1.118      | 4/1    | 11   | 0.00070               |
| HL_74505.1 | 4165  | 107895 | 1779 | 51609 | 4.100912e-05 | 1.119852   | 4/1    | 12   | 0.00084               |
| HL_05361.1 | 557   | 111503 | 192  | 53196 | 4.302211e-05 | 1.384057   | 6/2    | 13   | 0.00084               |
| HL_59604.1 | 2278  | 109782 | 940  | 52448 | 8.562144e-05 | 1.157762   | 3/1    | 14   | 0.00155               |
| HL_65071.1 | 961   | 111099 | 366  | 53022 | 0.0001       | 1.253071   | 4/1    | 15   | 0.00193               |
| HL_75850.1 | 3955  | 108105 | 1705 | 51683 | 0.0002       | 1.108976   | 5/1    | 16   | 0.00345               |
| HL_99207.1 | 1858  | 110202 | 764  | 52624 | 0.0003       | 1.161294   | 7/3    | 17   | 0.00397               |
| HL_34027.2 | 7166  | 104894 | 3180 | 50208 | 0.0003       | 1.078635   | 6/1    | 18   | 0.00402               |
| HL_57514.2 | 9336  | 102724 | 4207 | 49181 | 0.0009       | 1.062467   | 4/1    | 19   | 0.01162               |
| HL_86115.1 | 4107  | 107953 | 1795 | 51593 | 0.0010       | 1.09349    | 4/2    | 20   | 0.01162               |
| HL_59225.1 | 1996  | 110064 | 838  | 52550 | 0.0010       | 1.13721    | 5/1    | 21   | 0.01162               |
| HL_17790.1 | 2159  | 109901 | 916  | 52472 | 0.0015       | 1.125332   | 3/1    | 22   | 0.01723               |
| HL_17723.4 | 1774  | 110286 | 745  | 52643 | 0.0018       | 1.136618   | 7/1    | 23   | 0.01977               |
| HL_03785.1 | 3813  | 108247 | 1675 | 51713 | 0.0025       | 1.087514   | 5/1    | 24   | 0.02585               |
| HL_35619.2 | 1466  | 110594 | 615  | 52773 | 0.0039       | 1.13746    | 5/2    | 25   | 0.03638               |
| HL_75579.2 | 16159 | 95901  | 7437 | 45951 | 0.0039       | 1.041093   | 3/1    | 26   | 0.03638               |
| HL_00721.1 | 1325  | 110735 | 552  | 52836 | 0.0039       | 1.145297   | 2/1    | 27   | 0.03638               |
| HL_26579.1 | 667   | 111393 | 262  | 53126 | 0.0040       | 1.21413    | 5/2    | 28   | 0.03638               |
| HL_45018.3 | 876   | 111184 | 358  | 53030 | 0.0072       | 1.167067   | 10/4   | 29   | 0.06227               |
| HL_73465.1 | 29    | 112031 | 4    | 53384 | 0.0074       | 3.454503   | 11/2   | 30   | 0.06227               |
| HL_48116.2 | 8835  | 103225 | 4028 | 49360 | 0.0081       | 1.048838   | 6/1    | 31   | 0.06538               |
| HL_42077.2 | 15066 | 96994  | 6949 | 46439 | 0.0083       | 1.038041   | 5/2    | 32   | 0.06538               |

Continued on next page



Table G – continued from previous page

| Model      | A     | B      | C    | D     | P-value | Odds ratio | Nuc/Bp | Rank | Adj. p-value |
|------------|-------|--------|------|-------|---------|------------|--------|------|--------------|
| HL_68435.1 | 839   | 111221 | 343  | 53045 | 0.0085  | 1.166597   | 7/2    | 33   | 0.06538      |
| HL_99584.1 | 1330  | 110730 | 563  | 52825 | 0.0093  | 1.126977   | 4/1    | 34   | 0.06897      |
| HL_18587.1 | 842   | 111218 | 348  | 53040 | 0.0131  | 1.153871   | 8/2    | 35   | 0.09448      |
| HL_00090.1 | 757   | 111303 | 311  | 53077 | 0.0142  | 1.160729   | 11/1   | 36   | 0.10002      |
| HL_01418.1 | 1551  | 110509 | 671  | 52717 | 0.0184  | 1.102658   | 5/1    | 37   | 0.12570      |
| HL_72273.1 | 752   | 111308 | 312  | 53076 | 0.0206  | 1.149295   | 6/2    | 38   | 0.13603      |
| HL_46489.2 | 955   | 111105 | 403  | 52985 | 0.0210  | 1.130095   | 9/2    | 39   | 0.13603      |
| HL_24707.1 | 1715  | 110345 | 748  | 52640 | 0.0218  | 1.093766   | 4/2    | 40   | 0.13639      |
| HL_19905.3 | 8008  | 104052 | 3670 | 49718 | 0.0221  | 1.04261    | 4/1    | 41   | 0.13639      |
| HL_98523.2 | 4979  | 107081 | 2257 | 51131 | 0.0230  | 1.053376   | 6/1    | 42   | 0.13828      |
| HL_33277.1 | 1603  | 110457 | 701  | 52687 | 0.0294  | 1.090748   | 7/1    | 43   | 0.17270      |
| HL_41827.1 | 1157  | 110903 | 501  | 52887 | 0.0378  | 1.101285   | 7/2    | 44   | 0.21584      |
| HL_98833.3 | 750   | 111310 | 317  | 53071 | 0.0384  | 1.128035   | 8/2    | 45   | 0.21584      |
| HL_34108.2 | 9755  | 102305 | 4515 | 48873 | 0.0471  | 1.032148   | 4/1    | 46   | 0.25911      |
| HL_78420.1 | 560   | 111500 | 234  | 53154 | 0.0484  | 1.140854   | 9/1    | 47   | 0.26057      |
| HL_36842.1 | 2027  | 110033 | 904  | 52484 | 0.0494  | 1.069519   | 8/2    | 48   | 0.26059      |
| HL_44467.1 | 41    | 112019 | 11   | 53377 | 0.0549  | 1.776038   | 8/1    | 49   | 0.28353      |
| HL_24711.1 | 724   | 111336 | 311  | 53077 | 0.0662  | 1.109806   | 7/2    | 50   | 0.33506      |
| HL_56809.1 | 92    | 111968 | 32   | 53356 | 0.0724  | 1.370053   | 4/1    | 51   | 0.35409      |
| HL_95716.1 | 5882  | 106178 | 2711 | 50677 | 0.0728  | 1.035553   | 5/1    | 52   | 0.35409      |
| HL_21675.3 | 7496  | 104564 | 3470 | 49918 | 0.0749  | 1.031277   | 5/2    | 53   | 0.35733      |
| HL_30128.1 | 939   | 111121 | 411  | 52977 | 0.0787  | 1.089216   | 9/2    | 54   | 0.36868      |
| HL_78361.1 | 648   | 111412 | 279  | 53109 | 0.0827  | 1.107147   | 8/2    | 55   | 0.37443      |
| HL_48039.2 | 18489 | 93571  | 8664 | 44724 | 0.0832  | 1.019987   | 4/1    | 56   | 0.37443      |
| HL_50312.1 | 4336  | 107724 | 1991 | 51397 | 0.0844  | 1.039068   | 6/1    | 57   | 0.37443      |
| HL_66877.1 | 168   | 111892 | 65   | 53323 | 0.0860  | 1.231691   | 11/4   | 58   | 0.37496      |
| HL_42345.1 | 1101  | 110959 | 487  | 52901 | 0.0890  | 1.077851   | 7/1    | 59   | 0.38150      |
| HL_38138.1 | 838   | 111222 | 367  | 53021 | 0.0930  | 1.088514   | 6/1    | 60   | 0.39216      |
| HL_48254.1 | 1398  | 110662 | 625  | 52763 | 0.0954  | 1.066492   | 9/2    | 61   | 0.39569      |
| HL_05113.1 | 89    | 111971 | 32   | 53356 | 0.1000  | 1.325357   | 7/1    | 62   | 0.40813      |
| HL_58601.1 | 3786  | 108274 | 1739 | 51649 | 0.1021  | 1.038531   | 5/2    | 63   | 0.40992      |
| HL_91872.1 | 477   | 111583 | 205  | 53183 | 0.1154  | 1.109016   | 9/3    | 64   | 0.45619      |
| HL_73972.1 | 948   | 111112 | 421  | 52967 | 0.1195  | 1.073421   | 6/3    | 65   | 0.46073      |
| HL_27397.1 | 370   | 111690 | 157  | 53231 | 0.1202  | 1.123182   | 7/2    | 66   | 0.46073      |
| HL_44522.1 | 172   | 111888 | 69   | 53319 | 0.1266  | 1.187878   | 5/2    | 67   | 0.47796      |
| HL_23182.1 | 1189  | 110871 | 534  | 52854 | 0.1326  | 1.061451   | 8/2    | 68   | 0.49350      |
| HL_30731.1 | 1609  | 110451 | 730  | 52658 | 0.1398  | 1.050818   | 4/1    | 69   | 0.51248      |
| HL_84888.1 | 461   | 111599 | 200  | 53188 | 0.1429  | 1.098558   | 9/3    | 70   | 0.51637      |
| HL_78507.1 | 2115  | 109945 | 968  | 52420 | 0.1528  | 1.041727   | 5/1    | 71   | 0.54096      |
| HL_97270.3 | 2762  | 109298 | 1271 | 52117 | 0.1540  | 1.036184   | 7/2    | 72   | 0.54096      |
| HL_90579.3 | 456   | 111604 | 199  | 53189 | 0.1603  | 1.092076   | 10/2   | 73   | 0.55558      |
| HL_52116.1 | 769   | 111291 | 344  | 53044 | 0.1731  | 1.065476   | 7/2    | 74   | 0.59125      |
| HL_33875.1 | 695   | 111365 | 310  | 53078 | 0.1753  | 1.068534   | 11/3   | 75   | 0.59125      |
| HL_93530.1 | 1039  | 111021 | 470  | 52918 | 0.1818  | 1.053697   | 7/1    | 76   | 0.60513      |
| HL_55202.1 | 13    | 112047 | 3    | 53385 | 0.1891  | 2.064616   | 13/2   | 77   | 0.62142      |
| HL_66880.1 | 66    | 111994 | 25   | 53363 | 0.1940  | 1.257874   | 11/1   | 78   | 0.62916      |
| HL_18156.2 | 264   | 111796 | 114  | 53274 | 0.2057  | 1.103536   | 7/2    | 79   | 0.65888      |
| HL_24473.3 | 4     | 112056 | 0    | 53388 | 0.2104  | Inf        | 13/4   | 80   | 0.66555      |
| HL_33451.1 | 7     | 112053 | 1    | 53387 | 0.2131  | 3.334967   | 11/1   | 81   | 0.66559      |
| HL_93567.1 | 1805  | 110255 | 833  | 52555 | 0.2284  | 1.032847   | 7/1    | 82   | 0.70473      |
| HL_53015.1 | 552   | 111508 | 248  | 53140 | 0.2329  | 1.060724   | 8/3    | 83   | 0.70980      |
| HL_17008.1 | 29    | 112031 | 10   | 53378 | 0.2410  | 1.381755   | 10/2   | 84   | 0.71472      |
| HL_66174.1 | 995   | 111065 | 455  | 52933 | 0.2427  | 1.042216   | 9/4    | 85   | 0.71472      |
| HL_53789.1 | 2093  | 109967 | 970  | 52418 | 0.2429  | 1.028555   | 6/1    | 86   | 0.71472      |
| HL_08203.1 | 54    | 112006 | 21   | 53367 | 0.2550  | 1.225172   | 9/4    | 87   | 0.74158      |
| HL_63304.1 | 14    | 112046 | 4    | 53384 | 0.2611  | 1.66756    | 15/1   | 88   | 0.75077      |
| HL_20028.1 | 169   | 111891 | 73   | 53315 | 0.2655  | 1.103104   | 8/1    | 89   | 0.75461      |
| HL_57923.1 | 247   | 111813 | 109  | 53279 | 0.2723  | 1.079775   | 7/2    | 90   | 0.76543      |
| HL_65347.1 | 539   | 111521 | 245  | 53143 | 0.2843  | 1.048363   | 10/3   | 91   | 0.79028      |

Continued on next page

Table G – continued from previous page

| Model      | A     | B      | C     | D     | P-value | Odds ratio | Nuc/Bp | Rank | Adj. p-value |
|------------|-------|--------|-------|-------|---------|------------|--------|------|--------------|
| HL_82294.3 | 3034  | 109026 | 1420  | 51968 | 0.2936  | 1.018435   | 7/2    | 92   | 0.80736      |
| HL_62970.1 | 248   | 111812 | 111   | 53277 | 0.3135  | 1.064583   | 13/4   | 93   | 0.85293      |
| HL_74686.1 | 254   | 111806 | 114   | 53274 | 0.3195  | 1.061643   | 10/2   | 94   | 0.85566      |
| HL_25175.1 | 8     | 112052 | 2     | 53386 | 0.3246  | 1.905751   | 16/4   | 95   | 0.85566      |
| HL_68081.3 | 1578  | 110482 | 736   | 52652 | 0.3247  | 1.021785   | 8/2    | 96   | 0.85566      |
| HL_87223.1 | 143   | 111917 | 63    | 53325 | 0.3313  | 1.081507   | 7/1    | 97   | 0.85770      |
| HL_44390.1 | 15    | 112045 | 5     | 53383 | 0.3332  | 1.429339   | 11/3   | 98   | 0.85770      |
| HL_15603.2 | 84    | 111976 | 36    | 53352 | 0.3356  | 1.111734   | 12/1   | 99   | 0.85770      |
| HL_96915.1 | 625   | 111435 | 289   | 53099 | 0.3512  | 1.030528   | 9/2    | 100  | 0.88174      |
| HL_13707.2 | 68    | 111992 | 29    | 53359 | 0.3520  | 1.117197   | 8/3    | 101  | 0.88174      |
| HL_23195.1 | 5     | 112055 | 1     | 53387 | 0.3725  | 2.382167   | 17/3   | 102  | 0.91943      |
| HL_12706.1 | 1649  | 110411 | 774   | 52614 | 0.3743  | 1.015248   | 4/2    | 103  | 0.91943      |
| HL_42094.1 | 634   | 111426 | 296   | 53092 | 0.4016  | 1.020578   | 5/2    | 104  | 0.97403      |
| HL_82288.1 | 585   | 111475 | 273   | 53115 | 0.4042  | 1.021032   | 6/1    | 105  | 0.97403      |
| HL_33640.1 | 609   | 111451 | 287   | 53101 | 0.4552  | 1.011011   | 8/1    | 106  | 1.00000      |
| HL_42436.1 | 2     | 112058 | 0     | 53388 | 0.4588  | Inf        | 15/3   | 107  | 1.00000      |
| HL_11547.2 | 311   | 111749 | 146   | 53242 | 0.4637  | 1.014896   | 8/1    | 108  | 1.00000      |
| HL_93263.1 | 342   | 111718 | 161   | 53227 | 0.4713  | 1.012071   | 2/1    | 109  | 1.00000      |
| HL_78731.1 | 855   | 111205 | 405   | 52983 | 0.4752  | 1.005828   | 9/1    | 110  | 1.00000      |
| HL_62967.1 | 9566  | 102494 | 4554  | 48834 | 0.4865  | 1.000836   | 5/3    | 111  | 1.00000      |
| HL_83865.1 | 5409  | 106651 | 2576  | 50812 | 0.4990  | 1.000373   | 6/1    | 112  | 1.00000      |
| HL_20920.1 | 8     | 112052 | 3     | 53385 | 0.5032  | 1.270442   | 11/3   | 113  | 1.00000      |
| HL_79902.1 | 209   | 111851 | 99    | 53289 | 0.5083  | 1.005795   | 8/3    | 114  | 1.00000      |
| HL_93771.1 | 2827  | 109233 | 1347  | 52041 | 0.5088  | 0.9998779  | 6/1    | 115  | 1.00000      |
| HL_74465.5 | 863   | 111197 | 411   | 52977 | 0.5109  | 1.000376   | 9/1    | 116  | 1.00000      |
| HL_66948.1 | 489   | 111571 | 233   | 53155 | 0.5184  | 0.9998779  | 7/2    | 117  | 1.00000      |
| HL_72543.2 | 313   | 111747 | 149   | 53239 | 0.5190  | 1.000811   | 10/3   | 118  | 1.00000      |
| HL_57217.1 | 434   | 111626 | 207   | 53181 | 0.5242  | 0.9988561  | 8/2    | 119  | 1.00000      |
| HL_27429.3 | 216   | 111844 | 103   | 53285 | 0.5297  | 0.9990735  | 9/1    | 120  | 1.00000      |
| HL_11376.1 | 24425 | 87635  | 11647 | 41741 | 0.5383  | 0.9988626  | 5/1    | 121  | 1.00000      |
| HL_65249.1 | 8829  | 103231 | 4214  | 49174 | 0.5446  | 0.9980271  | 6/2    | 122  | 1.00000      |
| HL_28676.1 | 1344  | 110716 | 643   | 52745 | 0.5457  | 0.9957704  | 6/1    | 123  | 1.00000      |
| HL_94578.1 | 367   | 111693 | 176   | 53212 | 0.5490  | 0.9934294  | 6/3    | 124  | 1.00000      |
| HL_86398.1 | 87    | 111973 | 42    | 53346 | 0.5696  | 0.9868666  | 11/3   | 125  | 1.00000      |
| HL_11509.2 | 423   | 111637 | 204   | 53184 | 0.5757  | 0.9878318  | 10/3   | 126  | 1.00000      |
| HL_24108.1 | 72    | 111988 | 35    | 53353 | 0.5842  | 0.9800446  | 8/2    | 127  | 1.00000      |
| HL_42969.1 | 23    | 112037 | 11    | 53377 | 0.5849  | 0.9961571  | 10/1   | 128  | 1.00000      |
| HL_24544.2 | 2164  | 109896 | 1039  | 52349 | 0.5904  | 0.9921291  | 8/3    | 129  | 1.00000      |
| HL_01926.3 | 1082  | 110978 | 521   | 52867 | 0.5910  | 0.9893211  | 8/3    | 130  | 1.00000      |
| HL_55718.1 | 8303  | 103757 | 3973  | 49415 | 0.5970  | 0.9953081  | 3/1    | 131  | 1.00000      |
| HL_21545.1 | 2198  | 109862 | 1056  | 52332 | 0.5976  | 0.9914792  | 6/1    | 132  | 1.00000      |
| HL_62880.1 | 3043  | 109017 | 1461  | 51927 | 0.6041  | 0.9920892  | 6/1    | 133  | 1.00000      |
| HL_50059.1 | 642   | 111418 | 312   | 53076 | 0.6282  | 0.9802061  | 7/4    | 134  | 1.00000      |
| HL_06997.2 | 16    | 112044 | 8     | 53380 | 0.6376  | 0.9528407  | 12/2   | 135  | 1.00000      |
| HL_68733.1 | 202   | 111858 | 100   | 53288 | 0.6487  | 0.9623217  | 8/1    | 136  | 1.00000      |
| HL_38897.1 | 118   | 111942 | 59    | 53329 | 0.6523  | 0.9527978  | 7/1    | 137  | 1.00000      |
| HL_32644.2 | 359   | 111701 | 177   | 53211 | 0.6644  | 0.96622    | 10/3   | 138  | 1.00000      |
| HL_20806.1 | 1     | 112059 | 0     | 53388 | 0.6773  | Inf        | 11/2   | 139  | 1.00000      |
| HL_45358.1 | 1     | 112059 | 0     | 53388 | 0.6773  | Inf        | 13/2   | 140  | 1.00000      |
| HL_98577.1 | 1     | 112059 | 0     | 53388 | 0.6773  | Inf        | 13/2   | 141  | 1.00000      |
| HL_85044.1 | 21    | 112039 | 11    | 53377 | 0.6777  | 0.9095222  | 11/2   | 142  | 1.00000      |
| HL_94697.1 | 143   | 111917 | 72    | 53316 | 0.6781  | 0.9461621  | 11/2   | 143  | 1.00000      |
| HL_46175.2 | 490   | 111570 | 242   | 53146 | 0.6922  | 0.9645232  | 10/2   | 144  | 1.00000      |
| HL_85534.1 | 340   | 111720 | 169   | 53219 | 0.6925  | 0.9583632  | 7/3    | 145  | 1.00000      |
| HL_76585.1 | 469   | 111591 | 232   | 53156 | 0.6961  | 0.9629755  | 9/2    | 146  | 1.00000      |
| HL_13786.1 | 2736  | 109324 | 1325  | 52063 | 0.6962  | 0.9833538  | 5/1    | 147  | 1.00000      |
| HL_84289.1 | 32    | 112028 | 17    | 53371 | 0.7015  | 0.8967725  | 11/2   | 148  | 1.00000      |
| HL_88960.1 | 405   | 111655 | 202   | 53186 | 0.7190  | 0.9550434  | 8/2    | 149  | 1.00000      |
| HL_29196.1 | 591   | 111469 | 293   | 53095 | 0.7249  | 0.9607807  | 6/1    | 150  | 1.00000      |

Continued on next page

Table G – continued from previous page

| Model       | A     | B      | C     | D     | P-value | Odds ratio | Nuc/Bp | Rank | Adj. p-value |
|-------------|-------|--------|-------|-------|---------|------------|--------|------|--------------|
| HL_19226.1  | 515   | 111545 | 256   | 53132 | 0.7251  | 0.9582423  | 5/1    | 151  | 1.00000      |
| HL_82538.1  | 21764 | 90296  | 10437 | 42951 | 0.7323  | 0.9918979  | 5/1    | 152  | 1.00000      |
| HL_46570.1  | 958   | 111102 | 473   | 52915 | 0.7480  | 0.9646512  | 8/1    | 153  | 1.00000      |
| HL_59182.1  | 2     | 112058 | 1     | 53387 | 0.7548  | 0.9528466  | 15/2   | 154  | 1.00000      |
| HL_54751.2  | 61    | 111999 | 33    | 53355 | 0.7597  | 0.8806036  | 11/2   | 155  | 1.00000      |
| HL_87844.2  | 2401  | 109659 | 1172  | 52216 | 0.7605  | 0.9754724  | 6/2    | 156  | 1.00000      |
| HL_17537.1  | 177   | 111883 | 92    | 53296 | 0.7725  | 0.9164682  | 8/1    | 157  | 1.00000      |
| HL_60200.1  | 1102  | 110958 | 546   | 52842 | 0.7824  | 0.9612027  | 8/2    | 158  | 1.00000      |
| HL_04194.1  | 331   | 111729 | 170   | 53218 | 0.8015  | 0.927412   | 7/3    | 159  | 1.00000      |
| HL_58223.1  | 168   | 111892 | 89    | 53299 | 0.8103  | 0.8991696  | 5/1    | 160  | 1.00000      |
| HL_23129.1  | 51    | 112009 | 29    | 53359 | 0.8118  | 0.837789   | 9/2    | 161  | 1.00000      |
| HL_19528.1  | 512   | 111548 | 261   | 53127 | 0.8240  | 0.9342944  | 9/3    | 162  | 1.00000      |
| HL_26495.1  | 368   | 111692 | 190   | 53198 | 0.8283  | 0.9225048  | 8/1    | 163  | 1.00000      |
| HL_07915.1  | 564   | 111496 | 287   | 53101 | 0.8285  | 0.9359257  | 6/1    | 164  | 1.00000      |
| HL_76679.1  | 3591  | 108469 | 1758  | 51630 | 0.8327  | 0.9722585  | 5/2    | 165  | 1.00000      |
| HL_96994.1  | 10    | 112050 | 7     | 53381 | 0.8518  | 0.6805647  | 11/1   | 166  | 1.00000      |
| HL_58083.2  | 254   | 111806 | 135   | 53253 | 0.8604  | 0.8961514  | 9/2    | 167  | 1.00000      |
| HL_88311.2  | 558   | 111502 | 287   | 53101 | 0.8628  | 0.9259199  | 7/3    | 168  | 1.00000      |
| HL_85018.1  | 82    | 111978 | 47    | 53341 | 0.8653  | 0.8310994  | 10/1   | 169  | 1.00000      |
| HL_62881.1  | 503   | 111557 | 260   | 53128 | 0.8661  | 0.9213455  | 10/4   | 170  | 1.00000      |
| HL_95049.1  | 680   | 111380 | 348   | 53040 | 0.8690  | 0.9305225  | 8/1    | 171  | 1.00000      |
| HL_64371.2  | 28    | 112032 | 18    | 53370 | 0.8746  | 0.741015   | 12/2   | 172  | 1.00000      |
| HL_47784.2  | 636   | 111424 | 327   | 53061 | 0.8763  | 0.9262049  | 11/2   | 173  | 1.00000      |
| HL_39895.6  | 5528  | 106532 | 2704  | 50684 | 0.8777  | 0.9726158  | 5/2    | 174  | 1.00000      |
| HL_39486.1  | 4233  | 107827 | 2079  | 51309 | 0.8793  | 0.9688868  | 7/1    | 175  | 1.00000      |
| HL_23290.1  | 1177  | 110883 | 594   | 52794 | 0.8801  | 0.943431   | 7/1    | 176  | 1.00000      |
| HL_91613.1  | 14    | 112046 | 10    | 53378 | 0.8840  | 0.6669413  | 10/3   | 177  | 1.00000      |
| HL_45411.1  | 688   | 111372 | 354   | 53034 | 0.8873  | 0.9254748  | 8/2    | 178  | 1.00000      |
| HL_67761.1  | 4145  | 107915 | 2039  | 51349 | 0.8886  | 0.9673181  | 6/1    | 179  | 1.00000      |
| HL_72498.12 | 801   | 111259 | 411   | 52977 | 0.8955  | 0.9279913  | 7/2    | 180  | 1.00000      |
| HL_77692.1  | 603   | 111457 | 314   | 53074 | 0.9056  | 0.9144578  | 10/4   | 181  | 1.00000      |
| HL_25195.1  | 3     | 112057 | 3     | 53385 | 0.9100  | 0.4764001  | 12/2   | 182  | 1.00000      |
| HL_42553.1  | 16    | 112044 | 12    | 53376 | 0.9168  | 0.6351717  | 10/3   | 183  | 1.00000      |
| HL_91226.3  | 1422  | 110638 | 722   | 52666 | 0.9226  | 0.9375385  | 8/1    | 184  | 1.00000      |
| HL_82243.1  | 1205  | 110855 | 616   | 52772 | 0.9269  | 0.9312268  | 9/1    | 185  | 1.00000      |
| HL_70912.1  | 599   | 111461 | 316   | 53072 | 0.9334  | 0.9025772  | 7/1    | 186  | 1.00000      |
| HL_84768.1  | 514   | 111546 | 274   | 53114 | 0.9381  | 0.8932443  | 4/1    | 187  | 1.00000      |
| HL_80492.2  | 66    | 111994 | 42    | 53346 | 0.9406  | 0.7484921  | 8/4    | 188  | 1.00000      |
| HL_69403.1  | 176   | 111884 | 102   | 53286 | 0.9486  | 0.8218022  | 9/3    | 189  | 1.00000      |
| HL_68697.2  | 12287 | 99773  | 5997  | 47391 | 0.9488  | 0.973161   | 6/1    | 190  | 1.00000      |
| HL_18781.4  | 1906  | 110154 | 969   | 52419 | 0.9532  | 0.9360269  | 8/2    | 191  | 1.00000      |
| HL_30366.1  | 255   | 111805 | 144   | 53244 | 0.9533  | 0.8433235  | 11/5   | 192  | 1.00000      |
| HL_38898.1  | 332   | 111728 | 184   | 53204 | 0.9542  | 0.859227   | 8/1    | 193  | 1.00000      |
| HL_33402.3  | 1623  | 110437 | 830   | 52558 | 0.9545  | 0.9306054  | 7/2    | 194  | 1.00000      |
| HL_65924.1  | 2     | 112058 | 3     | 53385 | 0.9598  | 0.3176058  | 14/4   | 195  | 1.00000      |
| HL_49492.1  | 4     | 112056 | 5     | 53383 | 0.9638  | 0.3811177  | 14/4   | 196  | 1.00000      |
| HL_35200.1  | 1569  | 110491 | 808   | 52580 | 0.9661  | 0.9240732  | 6/1    | 197  | 1.00000      |
| HL_39872.2  | 643   | 111417 | 347   | 53041 | 0.9714  | 0.8821556  | 8/2    | 198  | 1.00000      |
| HL_80459.3  | 15085 | 96975  | 7373  | 46015 | 0.9739  | 0.9707987  | 5/1    | 199  | 1.00000      |
| HL_19132.1  | 318   | 111742 | 181   | 53207 | 0.9744  | 0.8365824  | 8/3    | 200  | 1.00000      |
| HL_56775.1  | 605   | 111455 | 329   | 53059 | 0.9751  | 0.8754331  | 7/2    | 201  | 1.00000      |
| HL_16770.1  | 166   | 111894 | 101   | 53287 | 0.9767  | 0.7827382  | 10/2   | 202  | 1.00000      |
| HL_66467.1  | 2367  | 109693 | 1215  | 52173 | 0.9841  | 0.9265949  | 5/1    | 203  | 1.00000      |
| HL_38130.2  | 24    | 112036 | 21    | 53367 | 0.9851  | 0.5443609  | 11/1   | 204  | 1.00000      |
| HL_65802.1  | 241   | 111819 | 144   | 53244 | 0.9857  | 0.7969348  | 11/3   | 205  | 1.00000      |
| HL_78228.1  | 677   | 111383 | 372   | 53016 | 0.9874  | 0.8662406  | 12/2   | 206  | 1.00000      |
| HL_39942.2  | 879   | 111181 | 478   | 52910 | 0.9907  | 0.8751291  | 7/1    | 207  | 1.00000      |
| HL_60203.1  | 161   | 111899 | 103   | 53285 | 0.9913  | 0.7443092  | 5/2    | 208  | 1.00000      |
| HL_86123.2  | 958   | 111102 | 519   | 52869 | 0.9914  | 0.8783773  | 10/2   | 209  | 1.00000      |

Continued on next page

Table G – continued from previous page

| Model       | A     | B      | C     | D     | P-value | Odds ratio | Nuc/Bp | Rank | Adj. p-value |
|-------------|-------|--------|-------|-------|---------|------------|--------|------|--------------|
| HL_41833.2  | 51    | 112009 | 40    | 53348 | 0.9927  | 0.6072537  | 11/4   | 210  | 1.00000      |
| HL_64543.2  | 1488  | 110572 | 793   | 52595 | 0.9950  | 0.8925483  | 9/2    | 211  | 1.00000      |
| HL_39422.1  | 537   | 111523 | 308   | 53080 | 0.9956  | 0.8298483  | 7/1    | 212  | 1.00000      |
| HL_08382.2  | 15585 | 96475  | 7681  | 45707 | 0.9957  | 0.9613123  | 6/1    | 213  | 1.00000      |
| HL_52574.3  | 4511  | 107549 | 2298  | 51090 | 0.9962  | 0.9325092  | 7/1    | 214  | 1.00000      |
| HL_61547.5  | 16828 | 95232  | 8292  | 45096 | 0.9968  | 0.9610274  | 6/1    | 215  | 1.00000      |
| HL_49036.3  | 24351 | 87709  | 11922 | 41466 | 0.9971  | 0.9656693  | 6/2    | 216  | 1.00000      |
| HL_06122.1  | 1678  | 110382 | 897   | 52491 | 0.9975  | 0.8895882  | 7/3    | 217  | 1.00000      |
| HL_47337.1  | 4700  | 107360 | 2402  | 50986 | 0.9979  | 0.9292535  | 5/1    | 218  | 1.00000      |
| HL_48480.1  | 635   | 111425 | 365   | 53023 | 0.9980  | 0.8278877  | 7/1    | 219  | 1.00000      |
| HL_68579.1  | 363   | 111697 | 221   | 53167 | 0.9981  | 0.7818626  | 6/2    | 220  | 1.00000      |
| HL_62228.3  | 6782  | 105278 | 3427  | 49961 | 0.9981  | 0.9391561  | 6/2    | 221  | 1.00000      |
| HL_34440.1  | 2133  | 109927 | 1130  | 52258 | 0.9982  | 0.8973528  | 6/1    | 222  | 1.00000      |
| HL_99633.1  | 530   | 111530 | 314   | 53074 | 0.9990  | 0.803246   | 8/3    | 223  | 1.00000      |
| HL_59610.1  | 1688  | 110372 | 916   | 52472 | 0.9993  | 0.8760917  | 5/1    | 224  | 1.00000      |
| HL_98233.1  | 85    | 111975 | 69    | 53319 | 0.9996  | 0.5865761  | 8/1    | 225  | 1.00000      |
| HL_37962.1  | 237   | 111823 | 159   | 53229 | 0.9996  | 0.7095096  | 8/2    | 226  | 1.00000      |
| HL_49210.1  | 716   | 111344 | 420   | 52968 | 0.9997  | 0.8110014  | 7/2    | 227  | 1.00000      |
| HL_99779.1  | 4649  | 107411 | 2444  | 50944 | 1.0000  | 0.9022039  | 5/1    | 228  | 1.00000      |
| HL_27271.2  | 22948 | 89112  | 11421 | 41967 | 1.0000  | 0.9462652  | 6/1    | 229  | 1.00000      |
| HL_55272.1  | 2318  | 109742 | 1283  | 52105 | 1.0000  | 0.8578252  | 10/4   | 230  | 1.00000      |
| HL_67000.1  | 6568  | 105492 | 3426  | 49962 | 1.0000  | 0.9079623  | 5/2    | 231  | 1.00000      |
| HL_52540.1  | 4859  | 107201 | 2575  | 50813 | 1.0000  | 0.8944338  | 4/2    | 232  | 1.00000      |
| HL_56824.2  | 11825 | 100235 | 6029  | 47359 | 1.0000  | 0.9267017  | 5/1    | 233  | 1.00000      |
| HL_91693.1  | 11389 | 100671 | 5826  | 47562 | 1.0000  | 0.9235744  | 5/1    | 234  | 1.00000      |
| HL_95720.1  | 1057  | 111003 | 639   | 52749 | 1.0000  | 0.786083   | 8/3    | 235  | 1.00000      |
| HL_10116.1  | 0     | 112060 | 0     | 53388 | 1.0000  | 0          | 18/5   | 236  | 1.00000      |
| HL_19221.2  | 6475  | 105585 | 3607  | 49781 | 1.0000  | 0.8463725  | 6/2    | 237  | 1.00000      |
| HL_19399.1  | 0     | 112060 | 0     | 53388 | 1.0000  | 0          | 16/2   | 238  | 1.00000      |
| HL_19452.1  | 0     | 112060 | 2     | 53386 | 1.0000  | 0          | 11/3   | 239  | 1.00000      |
| HL_25124.2  | 4485  | 107575 | 2493  | 50895 | 1.0000  | 0.8511577  | 5/2    | 240  | 1.00000      |
| HL_25197.1  | 0     | 112060 | 1     | 53387 | 1.0000  | 0          | 15/4   | 241  | 1.00000      |
| HL_29831.1  | 7144  | 104916 | 3899  | 49489 | 1.0000  | 0.8642908  | 6/2    | 242  | 1.00000      |
| HL_57843.1  | 3532  | 108528 | 1966  | 51422 | 1.0000  | 0.8512369  | 5/2    | 243  | 1.00000      |
| HL_67042.12 | 14869 | 97191  | 7801  | 45587 | 1.0000  | 0.8940232  | 6/2    | 244  | 1.00000      |
| HL_70420.2  | 0     | 112060 | 0     | 53388 | 1.0000  | 0          | 14/8   | 245  | 1.00000      |
| HL_76036.3  | 12018 | 100042 | 6499  | 46889 | 1.0000  | 0.8667196  | 5/1    | 246  | 1.00000      |
| HL_76766.4  | 8830  | 103230 | 4796  | 48592 | 1.0000  | 0.8666522  | 5/2    | 247  | 1.00000      |
| HL_79038.1  | 10571 | 101489 | 5684  | 47704 | 1.0000  | 0.8741815  | 5/1    | 248  | 1.00000      |
| HL_84353.1  | 9347  | 102713 | 5037  | 48351 | 1.0000  | 0.8735429  | 6/2    | 249  | 1.00000      |
| HL_87136.2  | 1276  | 110784 | 821   | 52567 | 1.0000  | 0.7374463  | 8/1    | 250  | 1.00000      |
| HL_90102.1  | 0     | 112060 | 0     | 53388 | 1.0000  | 0          | 19/3   | 251  | 1.00000      |
| HL_97784.1  | 0     | 112060 | 2     | 53386 | 1.0000  | 0          | 15/1   | 252  | 1.00000      |
| HL_97971.1  | 6645  | 105415 | 3721  | 49667 | 1.0000  | 0.8414104  | 6/1    | 253  | 1.00000      |

Table H: Results of Fisher’s exact test according to scheme shown in Table B for JAR3D HL module predictions from all JAR3D HL models with mean interior edit distance  $\leq 4$  and passed cutoff  $\geq 50$ .

| order | model | A     | B     | C     | D    | p.value  | odds.ratio |
|-------|-------|-------|-------|-------|------|----------|------------|
| H     | all   | 94208 | 17852 | 44755 | 8633 | 0.108449 | 1.017947   |

Table I: False discovery rates (FDR) for individual mRm<sub>IL</sub> models with mean RMDetect score  $\geq Q_{0.75}$  in windows with p-score  $> 0.9$  and  $0.25 \leq$  GC content  $\leq 0.75$  of order H. Status “+” denotes models with adjusted p-value  $\leq 0.05$  and odds ratio  $\geq 1.0$  whereas “\*” denotes models with odds ratio  $\geq 1.0$ . Models assigned with “-” are neither enriched nor occur at higher rates in the original data. Colored rows have an FDR  $\leq \hat{F}_{rnaz}$  and original window count  $\geq 6$ . The table is sorted in ascending order according to the FDR.

| p-score $> 0.9$ , $0.25 \leq$ GC content $\leq 0.75$ |            |            |         |            |       |
|------------------------------------------------------|------------|------------|---------|------------|-------|
| ModelID                                              | # original | # shuffled | FDR (%) | Odds ratio | Stat. |
| $\hat{F}_{rnaz}$                                     | 142 455    | 66 891     | 47.0%   |            |       |
| RF00011_1583_1NBS_177_190_209_219                    | 0          | 0          | 0.000   | 0.000      | -     |
| RF00177_1133_2VHO_380_389_400_408                    | 0          | 0          | 0.000   | 0.000      | -     |
| RF00177_698_2B64_481_491_518_522                     | 0          | 0          | 0.000   | Inf        | *     |
| RF01118_270_2QBC_13_17_35_55                         | 0          | 0          | 0.000   | 0.000      | -     |
| RF00177_351_1I95_804_807_829_846                     | 1          | 0          | 0.000   | Inf        | *     |
| RF00177_437_2QBF_488_495_500_509                     | 0          | 0          | 0.000   | 0.000      | -     |
| RF00177_551_2UXD_494_500_507_515                     | 0          | 0          | 0.000   | 0.000      | -     |
| RF00177_171_1HR0_804_807_829_846                     | 1          | 0          | 0.000   | Inf        | *     |
| RF00177_1470_1XNQ_1103_1111_1121_1128                | 1          | 0          | 0.000   | 0.476      | -     |
| RF00177_1369_2GY9_669_675_686_695                    | 2          | 0          | 0.000   | Inf        | *     |
| RF00177_524_1VOV_400_408_417_424                     | 3          | 0          | 0.000   | Inf        | *     |
| RF00177_857_3BBN_130_136_151_158                     | 12         | 2          | 16.667  | 1.429      | *     |
| RF00177_1012_3FIH_120_126_141_148                    | 12         | 2          | 16.667  | 1.143      | *     |
| RF00177_942_1N36_137_143_158_165                     | 11         | 2          | 18.182  | 1.310      | *     |
| RF00177_243_2QBB_382_389_400_406                     | 5          | 1          | 20.000  | 0.596      | -     |
| RF00177_751_1IBL_660_665_676_684                     | 4          | 1          | 25.000  | 3.335      | *     |
| RF00177_235_2HHH_1380_1383_1471_1475                 | 172        | 47         | 27.326  | 1.746      | +     |
| RF01857_613_1QZW_192_198_207_213                     | 14         | 4          | 28.571  | 1.112      | *     |
| RF00177_831_2V48_435_440_463_469                     | 269        | 86         | 31.970  | 1.312      | +     |
| RF00177_1312_2HGR_59_65_89_93                        | 55         | 18         | 32.727  | 0.907      | -     |
| RF00177_206_2Z4M_419_423_456_461                     | 1507       | 497        | 32.979  | 1.381      | +     |
| RF00177_1124_2VHP_419_427_452_461                    | 6          | 2          | 33.333  | 1.270      | *     |
| RF00177_1_1J5E_482_490_519_521                       | 9          | 3          | 33.333  | 0.681      | -     |
| RF00177_325_1VS5_121_126_141_147                     | 52         | 18         | 34.615  | 0.986      | -     |
| RF00177_1595_1N34_1100_1107_1122_1131                | 8          | 3          | 37.500  | 1.588      | *     |
| RF00177_1_2GYB_490_498_527_529                       | 8          | 3          | 37.500  | 0.953      | -     |
| RF00177_955_2HHH_436_440_463_468                     | 644        | 243        | 37.733  | 1.278      | +     |
| RF00177_874_2F4V_1225_1231_1262_1268                 | 392        | 149        | 38.010  | 1.308      | +     |
| RF00167_327_1Y26_26_29_49_56                         | 324        | 124        | 38.272  | 1.217      | *     |
| RF00177_145_2QBF_1222_1228_1259_1265                 | 398        | 153        | 38.442  | 1.331      | +     |
| RF00001_5_1N8R_75_81_101_106                         | 876        | 353        | 40.297  | 1.135      | *     |
| RF00177_32_1VOX_748_752_768_772                      | 487        | 198        | 40.657  | 1.132      | *     |
| RF00162_600_2GIS_17_21_32_39                         | 637        | 259        | 40.659  | 1.064      | *     |
| RF00177_11_2VHP_752_756_772_776                      | 481        | 196        | 40.748  | 1.107      | *     |
| RF00177_35_2B9M_757_761_777_781                      | 516        | 211        | 40.891  | 1.133      | *     |
| RF00001_1334_2GYC_21_28_52_58                        | 1327       | 547        | 41.221  | 1.128      | *     |
| RF00001_196_2QBE_69_77_95_103                        | 2335       | 965        | 41.328  | 1.097      | *     |
| RF00015_758_2OZB_28_34_42_45                         | 1892       | 791        | 41.808  | 1.070      | *     |
| RF00177_418_1S1H_661_665_676_683                     | 42         | 18         | 42.857  | 1.132      | *     |
| RF00177_231_2GYB_766_770_786_790                     | 519        | 224        | 43.160  | 1.032      | *     |

Continued on next page

Table I – continued from previous page

| p-score > 0.9, 0.25 ≤ GC content ≤ 0.75 |            |            |         |            |       |
|-----------------------------------------|------------|------------|---------|------------|-------|
| ModelID                                 | # original | # shuffled | FDR (%) | Odds ratio | Stat. |
| $\hat{F}_{rnaz}$                        | 142 455    | 66 891     | 47.0%   |            |       |
| RF00177_1166_2UXD_1224_1231_1262_1269   | 221        | 96         | 43.439  | 1.082      | *     |
| RF00177_90_1HNV_1281_1285_1308_1312     | 154        | 67         | 43.506  | 1.170      | *     |
| RF00001_449_3CCQ_32_37_43_48            | 3099       | 1371       | 44.240  | 1.071      | *     |
| RF00177_1114_2VHP_1404_1410_1441_1446   | 857        | 385        | 44.924  | 1.052      | *     |
| RF00177_284_2QBJ_1099_1104_1118_1124    | 225        | 102        | 45.333  | 1.112      | *     |
| RF00001_1060_3BBO_68_77_96_105          | 693        | 318        | 45.887  | 1.094      | *     |
| RF00177_1303_2HHH_138_143_158_164       | 53         | 25         | 47.170  | 1.035      | *     |
| RF00177_192_2QBD_657_661_672_679        | 38         | 18         | 47.368  | 1.202      | *     |
| RF00017_631_2J37_181_187_212_216        | 2396       | 1163       | 48.539  | 1.009      | *     |
| RF00177_1127_2VHO_1404_1411_1440_1446   | 205        | 102        | 49.756  | 1.016      | *     |
| RF00177_324_1VS5_475_484_513_516        | 2          | 1          | 50.000  | 1.429      | *     |
| RF00177_1592_1N36_436_445_457_468       | 2          | 1          | 50.000  | 0.715      | -     |
| RF00017_1608_1L9A_190_194_205_209       | 193        | 97         | 50.259  | 0.970      | -     |
| RF00177_579_2J02_440_446_456_463        | 664        | 343        | 51.657  | 0.888      | -     |
| RF00059_318_2GDI_55_59_72_76            | 4740       | 2558       | 53.966  | 0.862      | -     |
| RF00177_244_3DF3_1278_1282_1305_1309    | 112        | 61         | 54.464  | 0.960      | -     |
| RF00177_432_2QP0_215_220_250_257        | 29         | 18         | 62.069  | 0.802      | -     |
| RF00177_36_2QB9_862_869_880_885         | 12         | 8          | 66.667  | 0.953      | -     |
| RF00177_334_1HNV_233_238_268_275        | 23         | 16         | 69.565  | 0.673      | -     |
| RF00169_236_1CQ5_37_41_52_56            | 75         | 57         | 76.000  | 0.786      | -     |
| RF00177_87_2QAN_541_548_855_857         | 7          | 6          | 85.714  | 0.298      | -     |
| RF00177_495_2B64_859_866_877_882        | 10         | 9          | 90.000  | 0.749      | -     |
| RF00177_1167_2UXD_399_407_418_425       | 1          | 3          | 300.000 | 0.159      | -     |

Table J: False discovery rates (FDR) for individual JAR3D IL modules with mean interior edit distance  $\leq 4$  and passed cutoff  $\geq 50$  in windows with p-score  $> 0.9$  and  $0.25 \leq \text{GC content} \leq 0.75$  of order H. Status “+” denotes models with adjusted p-value  $\leq 0.05$  and odds ratio  $\geq 1.0$  whereas “\*” denotes models with odds ratio  $\geq 1.0$ . Models assigned with “-” are neither enriched nor occur at higher rates in the original data. “Msl” = average 3D sequence length. Colored rows have an  $\text{FDR} \leq \hat{F}_{rnaz}$ , original window count  $\geq 6$ , and  $\text{Msl} \geq 9$ . The table is sorted in ascending order according to FDR.

| p-score > 0.9, 0.25 ≤ GC content ≤ 0.75 |            |            |         |            |       |     |
|-----------------------------------------|------------|------------|---------|------------|-------|-----|
| ModelID                                 | # original | # shuffled | FDR (%) | Odds ratio | Stat. | Msl |
| $\hat{F}_{rnaz}$                        | 142 455    | 66 891     | 47.0%   |            |       |     |
| IL_05513.1                              | 2          | 0          | 0.000   | Inf        | *     | 12  |
| IL_39324.1                              | 0          | 0          | 0.000   | 0.000      | -     | 20  |
| IL_40527.1                              | 0          | 0          | 0.000   | 0.000      | -     | 16  |
| IL_42891.1                              | 1          | 0          | 0.000   | Inf        | *     | 16  |
| IL_46435.1                              | 7          | 0          | 0.000   | Inf        | *     | 13  |
| IL_52610.1                              | 0          | 0          | 0.000   | 0.000      | -     | 37  |
| IL_76095.3                              | 0          | 0          | 0.000   | 0.000      | -     | 20  |

Continued on next page

Table J – continued from previous page

| p-score > 0.9, 0.25 ≤ GC content ≤ 0.75 |            |            |         |            |       |      |
|-----------------------------------------|------------|------------|---------|------------|-------|------|
| ModelID                                 | # original | # shuffled | FDR (%) | Odds ratio | Stat. | Msl  |
| $\hat{F}_{rnaz}$                        | 142 455    | 66 891     | 47.0%   |            |       |      |
| IL_76263.1                              | 0          | 0          | 0.000   | 0.000      | -     | 19   |
| IL_77076.1                              | 0          | 0          | 0.000   | 0.000      | -     | 18   |
| IL_77296.1                              | 0          | 0          | 0.000   | 0.000      | -     | 15   |
| IL_06847.1                              | 6          | 0          | 0.000   | Inf        | *     | 13   |
| IL_88367.1                              | 0          | 0          | 0.000   | 0.000      | -     | 15   |
| IL_89028.6                              | 0          | 0          | 0.000   | 0.000      | -     | 16   |
| IL_90057.1                              | 0          | 0          | 0.000   | 0.000      | -     | 25   |
| IL_94744.1                              | 2          | 0          | 0.000   | Inf        | *     | 17   |
| IL_97842.1                              | 0          | 0          | 0.000   | 0.000      | -     | 16   |
| IL_98655.1                              | 0          | 0          | 0.000   | 0.000      | -     | 16   |
| IL_02359.3                              | 0          | 0          | 0.000   | 0.000      | -     | 17.6 |
| IL_16330.1                              | 0          | 0          | 0.000   | 0.000      | -     | 28   |
| IL_21421.1                              | 0          | 0          | 0.000   | 0.000      | -     | 20   |
| IL_21495.1                              | 1          | 0          | 0.000   | 0.000      | -     | 15   |
| IL_23414.1                              | 0          | 0          | 0.000   | 0.000      | -     | 21   |
| IL_25082.1                              | 2          | 0          | 0.000   | Inf        | *     | 18   |
| IL_25230.3                              | 0          | 0          | 0.000   | 0.000      | -     | 18   |
| IL_27668.1                              | 2          | 0          | 0.000   | Inf        | *     | 12   |
| IL_28572.2                              | 7          | 0          | 0.000   | Inf        | *     | 16   |
| IL_33964.1                              | 0          | 0          | 0.000   | 0.000      | -     | 23   |
| IL_80505.1                              | 10         | 1          | 10.000  | 4.289      | *     | 11   |
| IL_34628.2                              | 84         | 11         | 13.095  | 2.859      | +     | 13   |
| IL_39526.4                              | 7          | 1          | 14.286  | 2.859      | *     | 9    |
| IL_98591.3                              | 7          | 1          | 14.286  | 2.859      | *     | 16   |
| IL_63133.1                              | 57         | 9          | 15.789  | 3.098      | +     | 6    |
| IL_23448.1                              | 91         | 16         | 17.582  | 3.117      | +     | 6    |
| IL_61730.1                              | 28         | 5          | 17.857  | 2.382      | *     | 11   |
| IL_21639.1                              | 50         | 10         | 20.000  | 2.277      | *     | 9    |
| IL_41791.1                              | 99         | 20         | 20.202  | 1.756      | *     | 12   |
| IL_86357.3                              | 82         | 17         | 20.732  | 2.264      | +     | 6    |
| IL_34363.2                              | 23         | 5          | 21.739  | 2.263      | *     | 14   |
| IL_96206.3                              | 320        | 72         | 22.500  | 2.211      | +     | 6    |
| IL_73000.2                              | 277        | 63         | 22.744  | 2.208      | +     | 6.57 |
| IL_54450.1                              | 48         | 11         | 22.917  | 1.776      | *     | 8    |
| IL_57364.1                              | 26         | 6          | 23.077  | 2.382      | *     | 8    |
| IL_28644.1                              | 164        | 38         | 23.171  | 2.196      | +     | 6    |
| IL_06177.1                              | 43         | 10         | 23.256  | 1.906      | *     | 6    |
| IL_58291.4                              | 131        | 31         | 23.664  | 2.307      | +     | 6    |
| IL_91089.1                              | 50         | 12         | 24.000  | 2.859      | +     | 8    |

Continued on next page

Table J – continued from previous page

| p-score > 0.9, 0.25 ≤ GC content ≤ 0.75 |            |            |         |            |       |       |
|-----------------------------------------|------------|------------|---------|------------|-------|-------|
| ModelID                                 | # original | # shuffled | FDR (%) | Odds ratio | Stat. | Msl   |
| $\hat{F}_{rnaz}$                        | 142 455    | 66 891     | 47.0%   |            |       |       |
| IL_69799.1                              | 124        | 30         | 24.194  | 2.193      | +     | 6     |
| IL_43877.1                              | 95         | 23         | 24.211  | 1.803      | +     | 7.5   |
| IL_71942.1                              | 12         | 3          | 25.000  | 1.270      | *     | 10    |
| IL_75415.1                              | 8          | 2          | 25.000  | 0.953      | -     | 10    |
| IL_77014.1                              | 4          | 1          | 25.000  | Inf        | *     | 11    |
| IL_85647.3                              | 16         | 4          | 25.000  | 1.787      | *     | 15.06 |
| IL_31066.3                              | 44         | 11         | 25.000  | 1.906      | *     | 7     |
| IL_73276.5                              | 212        | 54         | 25.472  | 1.875      | +     | 8.18  |
| IL_70173.1                              | 186        | 48         | 25.806  | 1.875      | +     | 7.5   |
| IL_92027.3                              | 170        | 44         | 25.882  | 1.933      | +     | 6.24  |
| IL_92027.3                              | 170        | 44         | 25.882  | 1.933      | +     | 6.24  |
| IL_37406.1                              | 99         | 26         | 26.263  | 1.798      | +     | 8.5   |
| IL_87065.1                              | 148        | 39         | 26.351  | 1.668      | +     | 7     |
| IL_11751.1                              | 45         | 12         | 26.667  | 1.473      | *     | 7     |
| IL_98421.4                              | 123        | 33         | 26.829  | 1.643      | +     | 7     |
| IL_67887.1                              | 231        | 62         | 26.840  | 1.777      | +     | 6.5   |
| IL_58586.2                              | 334        | 90         | 26.946  | 1.790      | +     | 7     |
| IL_98566.1                              | 100        | 27         | 27.000  | 1.525      | *     | 9     |
| IL_28947.2                              | 344        | 93         | 27.035  | 1.828      | +     | 5.45  |
| IL_41153.1                              | 33         | 9          | 27.273  | 1.482      | *     | 8     |
| IL_39980.1                              | 120        | 33         | 27.500  | 1.765      | +     | 8     |
| IL_40845.1                              | 207        | 57         | 27.536  | 1.688      | +     | 8     |
| IL_97217.11                             | 373        | 103        | 27.614  | 1.742      | +     | 5.14  |
| IL_06808.1                              | 101        | 28         | 27.723  | 1.525      | *     | 9     |
| IL_43946.1                              | 18         | 5          | 27.778  | 1.548      | *     | 12    |
| IL_99397.1                              | 18         | 5          | 27.778  | 1.429      | *     | 9     |
| IL_31039.1                              | 68         | 19         | 27.941  | 1.710      | *     | 7     |
| IL_37325.1                              | 50         | 14         | 28.000  | 1.906      | *     | 7     |
| IL_44540.4                              | 221        | 62         | 28.054  | 1.725      | +     | 5.3   |
| IL_39199.4                              | 284        | 80         | 28.169  | 1.722      | +     | 5.28  |
| IL_47875.1                              | 567        | 160        | 28.219  | 1.756      | +     | 7.67  |
| IL_92109.3                              | 576        | 166        | 28.819  | 1.645      | +     | 6.07  |
| IL_46648.6                              | 239        | 69         | 28.870  | 1.661      | +     | 5.62  |
| IL_25300.3                              | 307        | 89         | 28.990  | 1.649      | +     | 5.29  |
| IL_94430.5                              | 386        | 113        | 29.275  | 1.623      | +     | 5.94  |
| IL_56513.1                              | 116        | 34         | 29.310  | 1.459      | *     | 9     |
| IL_50911.1                              | 37         | 11         | 29.730  | 1.800      | *     | 8     |
| IL_56465.4                              | 514        | 153        | 29.767  | 1.539      | +     | 5.74  |
| IL_50521.1                              | 60         | 18         | 30.000  | 1.373      | *     | 15    |

Continued on next page



Table J – continued from previous page

| p-score > 0.9, 0.25 ≤ GC content ≤ 0.75 |            |            |         |            |       |      |
|-----------------------------------------|------------|------------|---------|------------|-------|------|
| ModelID                                 | # original | # shuffled | FDR (%) | Odds ratio | Stat. | Msl  |
| $\hat{F}_{rnaz}$                        | 142 455    | 66 891     | 47.0%   |            |       |      |
| IL_91379.1                              | 10         | 3          | 30.000  | 1.906      | *     | 12   |
| IL_25271.2                              | 30         | 9          | 30.000  | 2.144      | *     | 15   |
| IL_31663.1                              | 113        | 34         | 30.088  | 1.430      | *     | 7.5  |
| IL_15205.1                              | 149        | 45         | 30.201  | 1.430      | *     | 13   |
| IL_68767.1                              | 109        | 33         | 30.275  | 1.702      | +     | 6    |
| IL_63253.1                              | 102        | 31         | 30.392  | 1.735      | +     | 7    |
| IL_09491.1                              | 36         | 11         | 30.556  | 1.477      | *     | 8    |
| IL_82444.1                              | 193        | 59         | 30.570  | 1.405      | *     | 6.59 |
| IL_01080.1                              | 221        | 68         | 30.769  | 1.613      | +     | 8    |
| IL_13069.3                              | 94         | 29         | 30.851  | 1.298      | *     | 8    |
| IL_17212.2                              | 238        | 74         | 31.092  | 1.390      | +     | 6.73 |
| IL_20775.1                              | 67         | 21         | 31.343  | 1.407      | *     | 8    |
| IL_86059.1                              | 118        | 37         | 31.356  | 1.545      | *     | 7    |
| IL_21254.1                              | 51         | 16         | 31.373  | 1.293      | *     | 14   |
| IL_88119.1                              | 206        | 65         | 31.553  | 1.486      | +     | 8    |
| IL_47732.1                              | 22         | 7          | 31.818  | 1.225      | *     | 9    |
| IL_02809.3                              | 287        | 92         | 32.056  | 1.603      | +     | 9.11 |
| IL_41139.1                              | 62         | 20         | 32.258  | 1.354      | *     | 8    |
| IL_18675.1                              | 102        | 33         | 32.353  | 1.553      | *     | 7    |
| IL_17066.1                              | 70         | 23         | 32.857  | 1.347      | *     | 6    |
| IL_31006.1                              | 219        | 72         | 32.877  | 1.333      | *     | 12   |
| IL_80348.3                              | 191        | 63         | 32.984  | 1.480      | +     | 6.33 |
| IL_47174.11                             | 300        | 99         | 33.000  | 1.385      | +     | 6.2  |
| IL_37104.3                              | 229        | 76         | 33.188  | 1.346      | *     | 7.36 |
| IL_37347.1                              | 18         | 6          | 33.333  | 1.334      | *     | 16   |
| IL_86981.1                              | 3          | 1          | 33.333  | 1.429      | *     | 15   |
| IL_95150.6                              | 78         | 26         | 33.333  | 1.596      | *     | 8.33 |
| IL_35043.1                              | 6          | 2          | 33.333  | 1.429      | *     | 11   |
| IL_13777.1                              | 119        | 40         | 33.613  | 1.430      | *     | 5    |
| IL_12147.1                              | 217        | 73         | 33.641  | 1.416      | +     | 6.5  |
| IL_21333.2                              | 287        | 97         | 33.798  | 1.474      | +     | 9.5  |
| IL_42251.1                              | 213        | 72         | 33.803  | 1.416      | +     | 7    |
| IL_16166.4                              | 138        | 47         | 34.058  | 1.377      | *     | 5    |
| IL_71685.1                              | 93         | 32         | 34.409  | 1.175      | *     | 14   |
| IL_57785.5                              | 55         | 19         | 34.545  | 1.345      | *     | 9    |
| IL_11778.1                              | 40         | 14         | 35.000  | 1.283      | *     | 8    |
| IL_69106.1                              | 207        | 73         | 35.266  | 1.292      | *     | 8.5  |
| IL_87394.1                              | 34         | 12         | 35.294  | 1.032      | *     | 10   |
| IL_90459.3                              | 544        | 192        | 35.294  | 1.290      | +     | 7.56 |

Continued on next page

Table J – continued from previous page

| p-score > 0.9, 0.25 ≤ GC content ≤ 0.75 |            |            |         |            |       |       |
|-----------------------------------------|------------|------------|---------|------------|-------|-------|
| ModelID                                 | # original | # shuffled | FDR (%) | Odds ratio | Stat. | Msl   |
| $\hat{F}_{rnaz}$                        | 142 455    | 66 891     | 47.0%   |            |       |       |
| IL_90133.3                              | 161        | 57         | 35.404  | 1.268      | *     | 8     |
| IL_88865.1                              | 31         | 11         | 35.484  | 1.429      | *     | 9     |
| IL_80494.2                              | 596        | 213        | 35.738  | 1.252      | +     | 12.67 |
| IL_13959.4                              | 176        | 63         | 35.795  | 1.311      | *     | 8.23  |
| IL_23262.4                              | 528        | 189        | 35.795  | 1.363      | +     | 11    |
| IL_46721.1                              | 103        | 37         | 35.922  | 1.566      | *     | 11    |
| IL_30381.1                              | 72         | 26         | 36.111  | 1.367      | *     | 8.5   |
| IL_39355.1                              | 412        | 150        | 36.408  | 1.231      | *     | 9     |
| IL_79083.3                              | 793        | 291        | 36.696  | 1.275      | +     | 11    |
| IL_97296.1                              | 241        | 89         | 36.929  | 1.215      | *     | 8.5   |
| IL_63952.1                              | 615        | 228        | 37.073  | 1.253      | +     | 13    |
| IL_06421.1                              | 121        | 45         | 37.190  | 1.105      | *     | 8     |
| IL_65553.8                              | 137        | 51         | 37.226  | 1.342      | *     | 13.3  |
| IL_22909.1                              | 115        | 43         | 37.391  | 1.229      | *     | 9     |
| IL_55649.1                              | 457        | 171        | 37.418  | 1.218      | *     | 9     |
| IL_55938.4                              | 334        | 126        | 37.725  | 1.245      | *     | 7.56  |
| IL_87507.1                              | 254        | 96         | 37.795  | 1.105      | *     | 9.5   |
| IL_43316.1                              | 1002       | 380        | 37.924  | 1.203      | *     | 11    |
| IL_43124.2                              | 195        | 74         | 37.949  | 1.145      | *     | 7.09  |
| IL_47758.2                              | 126        | 48         | 38.095  | 1.166      | *     | 8.5   |
| IL_70401.1                              | 13         | 5          | 38.462  | 1.191      | *     | 11    |
| IL_08926.3                              | 111        | 43         | 38.739  | 1.191      | *     | 5.5   |
| IL_12211.1                              | 152        | 59         | 38.816  | 1.288      | *     | 13.5  |
| IL_83856.1                              | 649        | 252        | 38.829  | 1.255      | +     | 12    |
| IL_64589.1                              | 64         | 25         | 39.062  | 1.293      | *     | 8     |
| IL_87904.5                              | 1373       | 538        | 39.184  | 1.198      | *     | 10    |
| IL_77263.2                              | 362        | 142        | 39.227  | 1.127      | *     | 11    |
| IL_06471.1                              | 598        | 235        | 39.298  | 1.154      | *     | 10    |
| IL_74876.2                              | 1017       | 401        | 39.430  | 1.216      | *     | 10.67 |
| IL_05684.1                              | 256        | 101        | 39.453  | 1.208      | *     | 9     |
| IL_41766.6                              | 375        | 148        | 39.467  | 1.178      | *     | 8.26  |
| IL_00998.1                              | 111        | 44         | 39.640  | 1.249      | *     | 8     |
| IL_85510.1                              | 873        | 348        | 39.863  | 1.128      | *     | 11    |
| IL_82650.1                              | 15         | 6          | 40.000  | 0.794      | -     | 13    |
| IL_37197.1                              | 808        | 324        | 40.099  | 1.164      | *     | 11    |
| IL_26971.1                              | 1019       | 409        | 40.137  | 1.163      | *     | 11    |
| IL_15840.2                              | 868        | 350        | 40.323  | 1.125      | *     | 11    |
| IL_24982.5                              | 1602       | 650        | 40.574  | 1.155      | *     | 10    |
| IL_83920.1                              | 64         | 26         | 40.625  | 1.086      | *     | 7     |

Continued on next page

Table J – continued from previous page

| p-score > 0.9, 0.25 ≤ GC content ≤ 0.75 |            |            |         |            |       |       |
|-----------------------------------------|------------|------------|---------|------------|-------|-------|
| ModelID                                 | # original | # shuffled | FDR (%) | Odds ratio | Stat. | Msl   |
| $\hat{F}_{rnaz}$                        | 142 455    | 66 891     | 47.0%   |            |       |       |
| IL_93568.2                              | 243        | 99         | 40.741  | 1.125      | *     | 12.5  |
| IL_06211.3                              | 153        | 63         | 41.176  | 1.182      | *     | 9.33  |
| IL_97191.1                              | 17         | 7          | 41.176  | 1.112      | *     | 13    |
| IL_57977.1                              | 82         | 34         | 41.463  | 0.953      | -     | 11    |
| IL_80093.1                              | 750        | 311        | 41.467  | 1.143      | *     | 11    |
| IL_70237.3                              | 1101       | 459        | 41.689  | 1.133      | *     | 10    |
| IL_80714.1                              | 561        | 234        | 41.711  | 1.144      | *     | 12    |
| IL_31224.1                              | 366        | 153        | 41.803  | 1.050      | *     | 10    |
| IL_39585.1                              | 1219       | 511        | 41.920  | 1.125      | *     | 12    |
| IL_97509.1                              | 876        | 369        | 42.123  | 1.077      | *     | 10.5  |
| IL_93424.4                              | 747        | 315        | 42.169  | 1.086      | *     | 10.19 |
| IL_22732.1                              | 201        | 85         | 42.289  | 1.069      | *     | 9     |
| IL_87548.1                              | 513        | 217        | 42.300  | 1.108      | *     | 11.5  |
| IL_45794.1                              | 52         | 22         | 42.308  | 0.953      | -     | 14    |
| IL_24546.4                              | 163        | 69         | 42.331  | 1.142      | *     | 10    |
| IL_11302.1                              | 1075       | 457        | 42.512  | 1.040      | *     | 10    |
| IL_09587.1                              | 3336       | 1419       | 42.536  | 1.077      | *     | 11.5  |
| IL_07300.2                              | 148        | 63         | 42.568  | 1.103      | *     | 9.33  |
| IL_05723.1                              | 570        | 243        | 42.632  | 1.145      | *     | 10    |
| IL_79955.2                              | 438        | 187        | 42.694  | 1.127      | *     | 12.67 |
| IL_70299.1                              | 96         | 41         | 42.708  | 1.149      | *     | 14    |
| IL_47444.3                              | 934        | 399        | 42.719  | 1.050      | *     | 12    |
| IL_25380.1                              | 194        | 83         | 42.784  | 1.107      | *     | 8.33  |
| IL_53635.3                              | 119        | 51         | 42.857  | 1.210      | *     | 13    |
| IL_78513.1                              | 28         | 12         | 42.857  | 0.780      | -     | 10    |
| IL_52509.1                              | 629        | 270        | 42.925  | 1.003      | *     | 10    |
| IL_21077.1                              | 204        | 88         | 43.137  | 1.010      | *     | 10    |
| IL_86336.1                              | 361        | 156        | 43.213  | 1.014      | *     | 10    |
| IL_46306.1                              | 1422       | 616        | 43.319  | 1.045      | *     | 10    |
| IL_69536.1                              | 1313       | 569        | 43.336  | 1.103      | *     | 10    |
| IL_75328.1                              | 23         | 10         | 43.478  | 1.361      | *     | 14    |
| IL_09333.1                              | 374        | 164        | 43.850  | 1.060      | *     | 13    |
| IL_06468.1                              | 319        | 140        | 43.887  | 1.057      | *     | 11    |
| IL_45262.4                              | 170        | 75         | 44.118  | 1.026      | *     | 9.25  |
| IL_16415.2                              | 18         | 8          | 44.444  | 0.834      | -     | 15    |
| IL_23639.1                              | 1407       | 626        | 44.492  | 1.039      | *     | 10    |
| IL_91044.1                              | 409        | 182        | 44.499  | 1.046      | *     | 11    |
| IL_54966.1                              | 336        | 150        | 44.643  | 1.026      | *     | 9     |
| IL_09530.1                              | 792        | 354        | 44.697  | 1.035      | *     | 11.5  |

Continued on next page

Table J – continued from previous page

| p-score > 0.9, 0.25 ≤ GC content ≤ 0.75 |            |            |         |            |       |       |
|-----------------------------------------|------------|------------|---------|------------|-------|-------|
| ModelID                                 | # original | # shuffled | FDR (%) | Odds ratio | Stat. | Msl   |
| $\hat{F}_{rnaz}$                        | 142 455    | 66 891     | 47.0%   |            |       |       |
| IL_46034.3                              | 96         | 43         | 44.792  | 0.965      | -     | 9     |
| IL_31555.5                              | 732        | 328        | 44.809  | 1.039      | *     | 9.23  |
| IL_33842.1                              | 29         | 13         | 44.828  | 1.032      | *     | 9     |
| IL_78744.1                              | 24         | 11         | 45.833  | 1.429      | *     | 12    |
| IL_17603.1                              | 408        | 187        | 45.833  | 1.134      | *     | 12    |
| IL_06180.1                              | 1093       | 507        | 46.386  | 1.005      | *     | 10.67 |
| IL_24293.1                              | 84         | 39         | 46.429  | 0.926      | -     | 8.5   |
| IL_52958.1                              | 3150       | 1470       | 46.667  | 1.006      | *     | 10    |
| IL_82188.2                              | 272        | 127        | 46.691  | 0.957      | -     | 14    |
| IL_54470.1                              | 429        | 201        | 46.853  | 0.938      | -     | 9     |
| IL_58454.1                              | 678        | 318        | 46.903  | 1.010      | *     | 10    |
| IL_59529.1                              | 586        | 275        | 46.928  | 1.035      | *     | 11    |
| IL_49493.4                              | 136        | 64         | 47.059  | 0.935      | -     | 13    |
| IL_03110.1                              | 446        | 211        | 47.309  | 0.994      | -     | 13    |
| IL_82563.1                              | 57         | 27         | 47.368  | 0.931      | -     | 10    |
| IL_52173.1                              | 189        | 90         | 47.619  | 0.983      | -     | 9     |
| IL_30067.1                              | 328        | 157        | 47.866  | 1.022      | *     | 10    |
| IL_26868.1                              | 465        | 224        | 48.172  | 0.963      | -     | 11    |
| IL_92321.4                              | 576        | 278        | 48.264  | 0.959      | -     | 12.14 |
| IL_97057.3                              | 826        | 399        | 48.305  | 1.002      | *     | 11.83 |
| IL_48918.3                              | 93         | 45         | 48.387  | 0.940      | -     | 13    |
| IL_46301.1                              | 287        | 139        | 48.432  | 0.957      | -     | 9.43  |
| IL_81398.1                              | 3827       | 1861       | 48.628  | 0.972      | -     | 10    |
| IL_12507.1                              | 92         | 45         | 48.913  | 0.929      | -     | 13    |
| IL_96446.1                              | 145        | 71         | 48.966  | 0.875      | -     | 11    |
| IL_53988.1                              | 118        | 58         | 49.153  | 0.896      | -     | 13    |
| IL_28003.1                              | 65         | 32         | 49.231  | 1.038      | *     | 8.67  |
| IL_62499.7                              | 562        | 278        | 49.466  | 0.909      | -     | 11    |
| IL_98924.1                              | 491        | 243        | 49.491  | 0.882      | -     | 10    |
| IL_49527.1                              | 897        | 445        | 49.610  | 0.976      | -     | 10    |
| IL_03282.1                              | 141        | 70         | 49.645  | 0.909      | -     | 10    |
| IL_87523.1                              | 161        | 80         | 49.689  | 0.938      | -     | 11    |
| IL_38807.3                              | 70         | 35         | 50.000  | 1.044      | *     | 12.75 |
| IL_06306.1                              | 36         | 18         | 50.000  | 1.209      | *     | 14    |
| IL_65137.1                              | 108        | 54         | 50.000  | 0.922      | -     | 13    |
| IL_80652.1                              | 18         | 9          | 50.000  | 1.021      | *     | 14    |
| IL_82601.1                              | 2          | 1          | 50.000  | Inf        | *     | 8     |
| IL_94403.5                              | 2          | 1          | 50.000  | Inf        | *     | 12.75 |
| IL_02835.1                              | 4          | 2          | 50.000  | 1.906      | *     | 13    |

Continued on next page

Table J – continued from previous page

| p-score > 0.9, 0.25 ≤ GC content ≤ 0.75 |            |            |         |            |       |       |
|-----------------------------------------|------------|------------|---------|------------|-------|-------|
| ModelID                                 | # original | # shuffled | FDR (%) | Odds ratio | Stat. | Msl   |
| $\hat{F}_{rnaz}$                        | 142 455    | 66 891     | 47.0%   |            |       |       |
| IL_27640.1                              | 2          | 1          | 50.000  | 0.953      | -     | 15    |
| IL_85805.1                              | 1103       | 555        | 50.317  | 0.956      | -     | 9     |
| IL_66744.1                              | 93         | 47         | 50.538  | 0.860      | -     | 14    |
| IL_30840.2                              | 2790       | 1411       | 50.573  | 0.930      | -     | 11.33 |
| IL_53323.1                              | 1176       | 597        | 50.765  | 0.891      | -     | 10    |
| IL_46990.1                              | 2070       | 1051       | 50.773  | 0.939      | -     | 12.5  |
| IL_40892.1                              | 121        | 62         | 51.240  | 1.061      | *     | 11    |
| IL_83250.1                              | 147        | 76         | 51.701  | 0.998      | -     | 11    |
| IL_72158.3                              | 160        | 83         | 51.875  | 0.865      | -     | 13    |
| IL_37053.1                              | 290        | 151        | 52.069  | 0.920      | -     | 13.67 |
| IL_09882.1                              | 124        | 65         | 52.419  | 1.027      | *     | 12    |
| IL_95652.3                              | 38         | 20         | 52.632  | 0.826      | -     | 14    |
| IL_25181.1                              | 1239       | 673        | 54.318  | 0.891      | -     | 13    |
| IL_49976.1                              | 1249       | 693        | 55.484  | 0.836      | -     | 13    |
| IL_25307.1                              | 66         | 37         | 56.061  | 0.749      | -     | 9     |
| IL_91078.1                              | 14         | 8          | 57.143  | 0.953      | -     | 14    |
| IL_31754.1                              | 7          | 4          | 57.143  | 0.715      | -     | 13    |
| IL_59934.1                              | 94         | 55         | 58.511  | 0.849      | -     | 13    |
| IL_89794.1                              | 29         | 17         | 58.621  | 0.851      | -     | 14    |
| IL_92114.3                              | 75         | 44         | 58.667  | 0.843      | -     | 9     |
| IL_60649.1                              | 51         | 30         | 58.824  | 0.812      | -     | 13    |
| IL_47687.1                              | 283        | 168        | 59.364  | 0.809      | -     | 14    |
| IL_52940.1                              | 268        | 167        | 62.313  | 0.834      | -     | 15.5  |
| IL_44067.4                              | 16         | 10         | 62.500  | 0.774      | -     | 14    |
| IL_97833.1                              | 30         | 19         | 63.333  | 0.916      | -     | 14    |
| IL_54954.1                              | 3          | 2          | 66.667  | 1.429      | *     | 17    |
| IL_76486.1                              | 3          | 2          | 66.667  | 0.715      | -     | 15    |
| IL_31707.1                              | 12         | 8          | 66.667  | 0.635      | -     | 11    |
| IL_94973.1                              | 17         | 12         | 70.588  | 0.520      | -     | 14    |
| IL_68827.1                              | 36         | 27         | 75.000  | 0.538      | -     | 11    |
| IL_05221.1                              | 4          | 3          | 75.000  | 0.476      | -     | 17    |
| IL_17682.1                              | 1          | 1          | 100.000 | 0.000      | -     | 17    |
| IL_90735.1                              | 20         | 21         | 105.000 | 0.603      | -     | 17    |
| IL_27243.1                              | 2          | 3          | 150.000 | 0.238      | -     | 15    |
| IL_57285.1                              | 0          | 1          | Inf     | 0.000      | -     | 13    |
| IL_91904.1                              | 0          | 1          | Inf     | 0.000      | -     | 17    |

Table K: False discovery rates (FDR) for individual JAR3D HL models with mean interior edit distance  $\leq 4$  and passed cutoff  $\geq 50$  in windows with p-score  $> 0.9$  and  $0.25 \leq \text{GC content} \leq 0.75$  of order H. Status “+” denotes models with adjusted p-value  $\leq 0.05$  and odds ratio  $\geq 1.0$  whereas “\*” denotes models with odds ratio  $\geq 1.0$ . Models assigned with “-” are neither enriched nor occur at higher rates in the original data. Colored rows have an FDR  $\leq \hat{F}_{rnaz}$  and original window count  $\geq 6$ . The table is sorted in ascending order according to the FDR.

| <b>p-score <math>&gt; 0.9</math>, <math>0.25 \leq \text{GC content} \leq 0.75</math></b> |            |            |         |            |       |
|------------------------------------------------------------------------------------------|------------|------------|---------|------------|-------|
| ModelID                                                                                  | # original | # shuffled | FDR (%) | Odds ratio | Stat. |
| $\hat{F}_{rnaz}$                                                                         | 142 455    | 66 891     | 47.0%   |            |       |
| HL_45358.1                                                                               | 1          | 0          | 0.000   | Inf        | *     |
| HL_10116.1                                                                               | 0          | 0          | 0.000   | 0.000      | -     |
| HL_70420.2                                                                               | 1          | 0          | 0.000   | 0.000      | -     |
| HL_90102.1                                                                               | 0          | 0          | 0.000   | 0.000      | -     |
| HL_19399.1                                                                               | 0          | 0          | 0.000   | 0.000      | -     |
| HL_24473.3                                                                               | 5          | 0          | 0.000   | Inf        | *     |
| HL_42436.1                                                                               | 2          | 0          | 0.000   | Inf        | *     |
| HL_33451.1                                                                               | 10         | 1          | 10.000  | 3.335      | *     |
| HL_73465.1                                                                               | 36         | 5          | 13.889  | 3.455      | *     |
| HL_44467.1                                                                               | 51         | 11         | 21.569  | 1.776      | *     |
| HL_44390.1                                                                               | 26         | 6          | 23.077  | 1.429      | *     |
| HL_20920.1                                                                               | 12         | 3          | 25.000  | 1.270      | *     |
| HL_25175.1                                                                               | 8          | 2          | 25.000  | 1.906      | *     |
| HL_55202.1                                                                               | 15         | 4          | 26.667  | 2.065      | *     |
| HL_56809.1                                                                               | 120        | 36         | 30.000  | 1.370      | *     |
| HL_87223.1                                                                               | 215        | 73         | 33.953  | 1.082      | *     |
| HL_05361.1                                                                               | 732        | 253        | 34.563  | 1.384      | +     |
| HL_65071.1                                                                               | 1258       | 463        | 36.804  | 1.253      | +     |
| HL_87554.1                                                                               | 2394       | 888        | 37.093  | 1.283      | +     |
| HL_90542.1                                                                               | 1225       | 455        | 37.143  | 1.359      | +     |
| HL_26579.1                                                                               | 859        | 320        | 37.253  | 1.214      | *     |
| HL_66877.1                                                                               | 206        | 78         | 37.864  | 1.232      | *     |
| HL_98833.3                                                                               | 1024       | 388        | 37.891  | 1.128      | *     |
| HL_68435.1                                                                               | 1136       | 437        | 38.468  | 1.167      | *     |
| HL_13707.2                                                                               | 96         | 37         | 38.542  | 1.117      | *     |
| HL_75759.4                                                                               | 7308       | 2838       | 38.834  | 1.208      | *     |
| HL_05113.1                                                                               | 102        | 40         | 39.216  | 1.325      | *     |
| HL_97499.1                                                                               | 2589       | 1018       | 39.320  | 1.205      | *     |
| HL_30008.1                                                                               | 2606       | 1025       | 39.332  | 1.199      | *     |
| HL_08203.1                                                                               | 61         | 24         | 39.344  | 1.225      | *     |
| HL_45018.3                                                                               | 1113       | 438        | 39.353  | 1.167      | *     |

Continued on next page

Table K – continued from previous page

| p-score > 0.9, 0.25 ≤ GC content ≤ 0.75 |            |            |         |            |       |
|-----------------------------------------|------------|------------|---------|------------|-------|
| ModelID                                 | # original | # shuffled | FDR (%) | Odds ratio | S.tat |
| $\hat{F}_{rnaz}$                        | 142 455    | 66 891     | 47.0%   |            |       |
| HL_10378.1                              | 2082       | 821        | 39.433  | 1.234      | *     |
| HL_00721.1                              | 1804       | 713        | 39.523  | 1.145      | *     |
| HL_74559.1                              | 3507       | 1392       | 39.692  | 1.182      | *     |
| HL_35865.1                              | 7475       | 2972       | 39.759  | 1.169      | *     |
| HL_23195.1                              | 5          | 2          | 40.000  | 2.382      | *     |
| HL_17723.4                              | 2326       | 937        | 40.284  | 1.137      | *     |
| HL_06643.3                              | 6967       | 2807       | 40.290  | 1.157      | *     |
| HL_44522.1                              | 218        | 88         | 40.367  | 1.188      | *     |
| HL_17790.1                              | 2837       | 1150       | 40.536  | 1.125      | *     |
| HL_59604.1                              | 2832       | 1149       | 40.572  | 1.158      | *     |
| HL_78420.1                              | 693        | 282        | 40.693  | 1.141      | *     |
| HL_59225.1                              | 2659       | 1084       | 40.767  | 1.137      | *     |
| HL_24711.1                              | 934        | 381        | 40.792  | 1.110      | *     |
| HL_15603.2                              | 110        | 45         | 40.909  | 1.112      | *     |
| HL_42677.2                              | 5809       | 2390       | 41.143  | 1.133      | *     |
| HL_63304.1                              | 17         | 7          | 41.176  | 1.668      | *     |
| HL_17008.1                              | 34         | 14         | 41.176  | 1.382      | *     |
| HL_46489.2                              | 1197       | 493        | 41.186  | 1.130      | *     |
| HL_35619.2                              | 1911       | 788        | 41.235  | 1.137      | *     |
| HL_66880.1                              | 80         | 33         | 41.250  | 1.258      | *     |
| HL_27429.3                              | 295        | 122        | 41.356  | 0.999      | -     |
| HL_01418.1                              | 1951       | 808        | 41.415  | 1.103      | *     |
| HL_06997.2                              | 24         | 10         | 41.667  | 0.953      | -     |
| HL_74505.1                              | 5475       | 2283       | 41.699  | 1.120      | *     |
| HL_72273.1                              | 972        | 406        | 41.770  | 1.149      | *     |
| HL_63941.1                              | 5691       | 2391       | 42.014  | 1.118      | *     |
| HL_41827.1                              | 1548       | 657        | 42.442  | 1.101      | *     |
| HL_24707.1                              | 2190       | 930        | 42.466  | 1.094      | *     |
| HL_20028.1                              | 209        | 89         | 42.584  | 1.103      | *     |
| HL_33640.1                              | 836        | 356        | 42.584  | 1.011      | *     |
| HL_18587.1                              | 1032       | 440        | 42.636  | 1.154      | *     |
| HL_33277.1                              | 2043       | 872        | 42.682  | 1.091      | *     |
| HL_99584.1                              | 1668       | 712        | 42.686  | 1.127      | *     |
| HL_27397.1                              | 459        | 196        | 42.702  | 1.123      | *     |
| HL_75850.1                              | 4867       | 2083       | 42.798  | 1.109      | *     |
| HL_78361.1                              | 800        | 343        | 42.875  | 1.107      | *     |
| HL_99207.1                              | 2250       | 968        | 43.022  | 1.161      | *     |
| HL_00090.1                              | 920        | 397        | 43.152  | 1.161      | *     |
| HL_65347.1                              | 672        | 290        | 43.155  | 1.048      | *     |

Continued on next page

Table K – continued from previous page

| p-score > 0.9, 0.25 ≤ GC content ≤ 0.75 |            |            |         |            |       |
|-----------------------------------------|------------|------------|---------|------------|-------|
| ModelID                                 | # original | # shuffled | FDR (%) | Odds ratio | S.tat |
| $\hat{F}_{rnaz}$                        | 142 455    | 66 891     | 47.0%   |            |       |
| HL_86115.1                              | 5087       | 2202       | 43.287  | 1.093      | *     |
| HL_52116.1                              | 1002       | 434        | 43.313  | 1.065      | *     |
| HL_34027.2                              | 9093       | 3939       | 43.319  | 1.079      | *     |
| HL_03785.1                              | 4699       | 2036       | 43.328  | 1.088      | *     |
| HL_42969.1                              | 30         | 13         | 43.333  | 0.996      | -     |
| HL_57923.1                              | 323        | 140        | 43.344  | 1.080      | *     |
| HL_73972.1                              | 1164       | 505        | 43.385  | 1.073      | *     |
| HL_90579.3                              | 578        | 252        | 43.599  | 1.092      | *     |
| HL_91872.1                              | 588        | 257        | 43.707  | 1.109      | *     |
| HL_48254.1                              | 1727       | 755        | 43.717  | 1.066      | *     |
| HL_53789.1                              | 2725       | 1195       | 43.853  | 1.029      | *     |
| HL_53015.1                              | 724        | 318        | 43.923  | 1.061      | *     |
| HL_94578.1                              | 505        | 222        | 43.960  | 0.993      | -     |
| HL_30731.1                              | 2002       | 885        | 44.206  | 1.051      | *     |
| HL_30128.1                              | 1100       | 490        | 44.545  | 1.089      | *     |
| HL_50312.1                              | 5418       | 2414       | 44.555  | 1.039      | *     |
| HL_94697.1                              | 193        | 86         | 44.560  | 0.946      | -     |
| HL_82288.1                              | 726        | 324        | 44.628  | 1.021      | *     |
| HL_36842.1                              | 2508       | 1123       | 44.777  | 1.070      | *     |
| HL_12706.1                              | 2056       | 923        | 44.893  | 1.015      | *     |
| HL_21675.3                              | 9386       | 4214       | 44.897  | 1.031      | *     |
| HL_93567.1                              | 2345       | 1053       | 44.904  | 1.033      | *     |
| HL_33875.1                              | 844        | 379        | 44.905  | 1.069      | *     |
| HL_96915.1                              | 786        | 353        | 44.911  | 1.031      | *     |
| HL_68081.3                              | 1985       | 892        | 44.937  | 1.022      | *     |
| HL_38138.1                              | 1099       | 494        | 44.950  | 1.089      | *     |
| HL_42345.1                              | 1335       | 601        | 45.019  | 1.078      | *     |
| HL_97270.3                              | 3457       | 1558       | 45.068  | 1.036      | *     |
| HL_74686.1                              | 335        | 151        | 45.075  | 1.062      | *     |
| HL_66174.1                              | 1231       | 556        | 45.167  | 1.042      | *     |
| HL_42077.2                              | 18422      | 8321       | 45.169  | 1.038      | *     |
| HL_75579.2                              | 19690      | 8899       | 45.196  | 1.041      | *     |
| HL_34108.2                              | 12294      | 5559       | 45.217  | 1.032      | *     |
| HL_23182.1                              | 1476       | 668        | 45.257  | 1.061      | *     |
| HL_58601.1                              | 4700       | 2132       | 45.362  | 1.039      | *     |
| HL_57514.2                              | 11499      | 5219       | 45.387  | 1.062      | *     |
| HL_62970.1                              | 304        | 138        | 45.395  | 1.065      | *     |
| HL_18156.2                              | 337        | 153        | 45.401  | 1.104      | *     |
| HL_48116.2                              | 11115      | 5047       | 45.407  | 1.049      | *     |

Continued on next page



Table K – continued from previous page

| p-score > 0.9, 0.25 ≤ GC content ≤ 0.75 |            |            |         |            |       |
|-----------------------------------------|------------|------------|---------|------------|-------|
| ModelID                                 | # original | # shuffled | FDR (%) | Odds ratio | S.tat |
| $\hat{F}_{rnaz}$                        | 142 455    | 66 891     | 47.0%   |            |       |
| HL_74465.5                              | 1109       | 504        | 45.446  | 1.000      | *     |
| HL_93530.1                              | 1234       | 561        | 45.462  | 1.054      | *     |
| HL_29196.1                              | 782        | 356        | 45.524  | 0.961      | -     |
| HL_78507.1                              | 2552       | 1163       | 45.572  | 1.042      | *     |
| HL_57217.1                              | 555        | 253        | 45.586  | 0.999      | -     |
| HL_84888.1                              | 565        | 258        | 45.664  | 1.099      | *     |
| HL_98523.2                              | 5979       | 2731       | 45.677  | 1.053      | *     |
| HL_42094.1                              | 817        | 376        | 46.022  | 1.021      | *     |
| HL_85044.1                              | 26         | 12         | 46.154  | 0.910      | -     |
| HL_19905.3                              | 9824       | 4537       | 46.183  | 1.043      | *     |
| HL_13786.1                              | 3577       | 1652       | 46.184  | 0.983      | -     |
| HL_65249.1                              | 11035      | 5100       | 46.217  | 0.998      | -     |
| HL_48039.2                              | 22713      | 10524      | 46.335  | 1.020      | *     |
| HL_95716.1                              | 7014       | 3269       | 46.607  | 1.036      | *     |
| HL_11509.2                              | 541        | 253        | 46.765  | 0.988      | -     |
| HL_82538.1                              | 26668      | 12472      | 46.768  | 0.992      | -     |
| HL_11376.1                              | 29990      | 14026      | 46.769  | 0.999      | -     |
| HL_62967.1                              | 11945      | 5598       | 46.865  | 1.001      | *     |
| HL_86398.1                              | 98         | 46         | 46.939  | 0.987      | -     |
| HL_62880.1                              | 3920       | 1849       | 47.168  | 0.992      | -     |
| HL_87844.2                              | 2954       | 1399       | 47.360  | 0.975      | -     |
| HL_68697.2                              | 15236      | 7222       | 47.401  | 0.973      | -     |
| HL_76679.1                              | 4542       | 2163       | 47.622  | 0.972      | -     |
| HL_78731.1                              | 1098       | 523        | 47.632  | 1.006      | *     |
| HL_72543.2                              | 384        | 183        | 47.656  | 1.001      | *     |
| HL_93771.1                              | 3562       | 1699       | 47.698  | 1.000      | -     |
| HL_82294.3                              | 3650       | 1741       | 47.699  | 1.018      | *     |
| HL_58083.2                              | 354        | 169        | 47.740  | 0.896      | -     |
| HL_28676.1                              | 1732       | 828        | 47.806  | 0.996      | -     |
| HL_21545.1                              | 2785       | 1334       | 47.899  | 0.991      | -     |
| HL_80459.3                              | 18599      | 8913       | 47.922  | 0.971      | -     |
| HL_50059.1                              | 824        | 395        | 47.937  | 0.980      | -     |
| HL_79902.1                              | 256        | 123        | 48.047  | 1.006      | *     |
| HL_49036.3                              | 29777      | 14309      | 48.054  | 0.966      | -     |
| HL_08382.2                              | 19060      | 9160       | 48.059  | 0.961      | -     |
| HL_55718.1                              | 10309      | 4960       | 48.113  | 0.995      | -     |
| HL_39895.6                              | 7029       | 3382       | 48.115  | 0.973      | -     |
| HL_01926.3                              | 1321       | 636        | 48.145  | 0.989      | -     |
| HL_34440.1                              | 2884       | 1389       | 48.162  | 0.897      | -     |

Continued on next page

Table K – continued from previous page

| p-score > 0.9, 0.25 ≤ GC content ≤ 0.75 |            |            |         |            |       |
|-----------------------------------------|------------|------------|---------|------------|-------|
| ModelID                                 | # original | # shuffled | FDR (%) | Odds ratio | S.tat |
| $\hat{F}_{rna}$                         | 142 455    | 66 891     | 47.0%   |            |       |
| HL_23290.1                              | 1474       | 711        | 48.236  | 0.943      | -     |
| HL_83865.1                              | 6524       | 3147       | 48.237  | 1.000      | *     |
| HL_66467.1                              | 3055       | 1480       | 48.445  | 0.927      | -     |
| HL_39486.1                              | 5420       | 2627       | 48.469  | 0.969      | -     |
| HL_45411.1                              | 885        | 429        | 48.475  | 0.925      | -     |
| HL_19226.1                              | 649        | 315        | 48.536  | 0.958      | -     |
| HL_61547.5                              | 20371      | 9907       | 48.633  | 0.961      | -     |
| HL_77692.1                              | 777        | 378        | 48.649  | 0.914      | -     |
| HL_66948.1                              | 600        | 292        | 48.667  | 1.000      | -     |
| HL_27271.2                              | 28295      | 13779      | 48.698  | 0.946      | -     |
| HL_67761.1                              | 5165       | 2523       | 48.848  | 0.967      | -     |
| HL_95049.1                              | 863        | 422        | 48.899  | 0.931      | -     |
| HL_32644.2                              | 433        | 212        | 48.961  | 0.966      | -     |
| HL_56824.2                              | 14649      | 7184       | 49.041  | 0.927      | -     |
| HL_46570.1                              | 1204       | 591        | 49.086  | 0.965      | -     |
| HL_62228.3                              | 8208       | 4033       | 49.135  | 0.939      | -     |
| HL_91693.1                              | 14009      | 6889       | 49.176  | 0.924      | -     |
| HL_07915.1                              | 679        | 334        | 49.190  | 0.936      | -     |
| HL_58223.1                              | 241        | 119        | 49.378  | 0.899      | -     |
| HL_19528.1                              | 654        | 325        | 49.694  | 0.934      | -     |
| HL_35200.1                              | 1974       | 981        | 49.696  | 0.924      | -     |
| HL_24544.2                              | 2593       | 1289       | 49.711  | 0.992      | -     |
| HL_46175.2                              | 599        | 298        | 49.750  | 0.965      | -     |
| HL_30366.1                              | 337        | 168        | 49.852  | 0.843      | -     |
| HL_11547.2                              | 399        | 199        | 49.875  | 1.015      | *     |
| HL_18781.4                              | 2361       | 1179       | 49.936  | 0.936      | -     |
| HL_47337.1                              | 5527       | 2763       | 49.991  | 0.929      | -     |
| HL_62881.1                              | 626        | 313        | 50.000  | 0.921      | -     |
| HL_64371.2                              | 36         | 18         | 50.000  | 0.741      | -     |
| HL_98577.1                              | 2          | 1          | 50.000  | Inf        | *     |
| HL_91226.3                              | 1757       | 881        | 50.142  | 0.938      | -     |
| HL_68733.1                              | 251        | 126        | 50.199  | 0.962      | -     |
| HL_88311.2                              | 699        | 352        | 50.358  | 0.926      | -     |
| HL_59610.1                              | 2179       | 1098       | 50.390  | 0.876      | -     |
| HL_60200.1                              | 1344       | 681        | 50.670  | 0.961      | -     |
| HL_47784.2                              | 792        | 402        | 50.758  | 0.926      | -     |
| HL_52574.3                              | 5577       | 2834       | 50.816  | 0.933      | -     |
| HL_72498.12                             | 972        | 494        | 50.823  | 0.928      | -     |
| HL_76585.1                              | 598        | 304        | 50.836  | 0.963      | -     |

Continued on next page

Table K – continued from previous page

| p-score > 0.9, 0.25 ≤ GC content ≤ 0.75 |            |            |         |            |       |
|-----------------------------------------|------------|------------|---------|------------|-------|
| ModelID                                 | # original | # shuffled | FDR (%) | Odds ratio | S.tat |
| $\hat{F}_{rna}$                         | 142 455    | 66 891     | 47.0%   |            |       |
| HL_70912.1                              | 777        | 395        | 50.837  | 0.903      | -     |
| HL_67042.12                             | 18345      | 9327       | 50.842  | 0.894      | -     |
| HL_67000.1                              | 7829       | 3988       | 50.939  | 0.908      | -     |
| HL_82243.1                              | 1436       | 732        | 50.975  | 0.931      | -     |
| HL_33402.3                              | 2019       | 1033       | 51.164  | 0.931      | -     |
| HL_84289.1                              | 37         | 19         | 51.351  | 0.897      | -     |
| HL_93263.1                              | 406        | 209        | 51.478  | 1.012      | *     |
| HL_64543.2                              | 1886       | 971        | 51.485  | 0.893      | -     |
| HL_85534.1                              | 402        | 207        | 51.493  | 0.958      | -     |
| HL_84353.1                              | 11504      | 5938       | 51.617  | 0.874      | -     |
| HL_26495.1                              | 455        | 235        | 51.648  | 0.923      | -     |
| HL_04194.1                              | 385        | 199        | 51.688  | 0.927      | -     |
| HL_84768.1                              | 729        | 377        | 51.715  | 0.893      | -     |
| HL_39872.2                              | 810        | 419        | 51.728  | 0.882      | -     |
| HL_88960.1                              | 491        | 254        | 51.731  | 0.955      | -     |
| HL_06122.1                              | 2125       | 1103       | 51.906  | 0.890      | -     |
| HL_52540.1                              | 5754       | 2989       | 51.946  | 0.894      | -     |
| HL_17537.1                              | 221        | 115        | 52.036  | 0.916      | -     |
| HL_23129.1                              | 69         | 36         | 52.174  | 0.838      | -     |
| HL_39942.2                              | 1105       | 577        | 52.217  | 0.875      | -     |
| HL_86123.2                              | 1247       | 654        | 52.446  | 0.878      | -     |
| HL_76766.4                              | 10801      | 5666       | 52.458  | 0.867      | -     |
| HL_38898.1                              | 436        | 229        | 52.523  | 0.859      | -     |
| HL_76036.3                              | 14634      | 7690       | 52.549  | 0.867      | -     |
| HL_79038.1                              | 12725      | 6687       | 52.550  | 0.874      | -     |
| HL_25124.2                              | 5637       | 2977       | 52.812  | 0.851      | -     |
| HL_56775.1                              | 744        | 393        | 52.823  | 0.875      | -     |
| HL_29831.1                              | 8663       | 4586       | 52.938  | 0.864      | -     |
| HL_38897.1                              | 166        | 88         | 53.012  | 0.953      | -     |
| HL_99779.1                              | 5553       | 2949       | 53.106  | 0.902      | -     |
| HL_96994.1                              | 13         | 7          | 53.846  | 0.681      | -     |
| HL_19221.2                              | 8063       | 4344       | 53.876  | 0.846      | -     |
| HL_97971.1                              | 8064       | 4363       | 54.105  | 0.841      | -     |
| HL_39422.1                              | 667        | 366        | 54.873  | 0.830      | -     |
| HL_60203.1                              | 225        | 124        | 55.111  | 0.744      | -     |
| HL_48480.1                              | 788        | 435        | 55.203  | 0.828      | -     |
| HL_24108.1                              | 81         | 45         | 55.556  | 0.980      | -     |
| HL_49210.1                              | 938        | 522        | 55.650  | 0.811      | -     |
| HL_65802.1                              | 312        | 174        | 55.769  | 0.797      | -     |

Continued on next page

Table K – continued from previous page

| p-score > 0.9, 0.25 ≤ GC content ≤ 0.75 |            |            |         |            |       |
|-----------------------------------------|------------|------------|---------|------------|-------|
| ModelID                                 | # original | # shuffled | FDR (%) | Odds ratio | S.tat |
| $\hat{F}_{rna}$                         | 142 455    | 66 891     | 47.0%   |            |       |
| HL_57843.1                              | 4213       | 2356       | 55.922  | 0.851      | -     |
| HL_55272.1                              | 2800       | 1579       | 56.393  | 0.858      | -     |
| HL_78228.1                              | 820        | 465        | 56.707  | 0.866      | -     |
| HL_95720.1                              | 1316       | 764        | 58.055  | 0.786      | -     |
| HL_80492.2                              | 93         | 54         | 58.065  | 0.748      | -     |
| HL_68579.1                              | 467        | 275        | 58.887  | 0.782      | -     |
| HL_54751.2                              | 77         | 46         | 59.740  | 0.881      | -     |
| HL_85018.1                              | 97         | 58         | 59.794  | 0.831      | -     |
| HL_16770.1                              | 214        | 128        | 59.813  | 0.783      | -     |
| HL_69403.1                              | 207        | 125        | 60.386  | 0.822      | -     |
| HL_37962.1                              | 298        | 180        | 60.403  | 0.710      | -     |
| HL_99633.1                              | 646        | 391        | 60.526  | 0.803      | -     |
| HL_19132.1                              | 367        | 229        | 62.398  | 0.837      | -     |
| HL_87136.2                              | 1574       | 990        | 62.897  | 0.737      | -     |
| HL_38130.2                              | 36         | 23         | 63.889  | 0.544      | -     |
| HL_91613.1                              | 15         | 10         | 66.667  | 0.667      | -     |
| HL_41833.2                              | 66         | 45         | 68.182  | 0.607      | -     |
| HL_42553.1                              | 19         | 14         | 73.684  | 0.635      | -     |
| HL_98233.1                              | 122        | 91         | 74.590  | 0.587      | -     |
| HL_65924.1                              | 4          | 3          | 75.000  | 0.318      | -     |
| HL_59182.1                              | 3          | 3          | 100.000 | 0.953      | -     |
| HL_20806.1                              | 1          | 1          | 100.000 | Inf        | *     |
| HL_25195.1                              | 3          | 3          | 100.000 | 0.476      | -     |
| HL_49492.1                              | 4          | 5          | 125.000 | 0.381      | -     |
| HL_97784.1                              | 0          | 3          | Inf     | 0.000      | -     |
| HL_25197.1                              | 0          | 1          | Inf     | 0.000      | -     |
| HL_19452.1                              | 0          | 2          | Inf     | 0.000      | -     |
