# Supplementary material for: RNA 3D Modules in Genome-Wide Predictions of RNA 2D Structure
Source: PubMed Central journal article supplement (PMC4624896; doi:10.1371/journal.pone.0139900), 2015-10-28
Supplement: pone.0139900.s007.pdf [file pone.0139900.s007.pdf]

**Supplementary Information 3**  
**Fisher's exact test results of alternative approaches**  
**L and R.**

Table A: Fisher’s exact test according to the FET scheme (see Supplementary Material S6) for mRm<sub>IL</sub> module predictions for SISSIz and original data of order L. Yellow highlighted rows have a significant p-value after multiple testing correction using the Benjamini-Hochberg procedure at a 5% false discovery rate (adjusted p-value). “Nuc./Pb” denotes the total strand length and the number of paired bases.

| ModelID                               | A    | B      | C    | D     | P-value      | Odds ratio | Nuc./Pb | Rank | Adj. p-value   |
|---------------------------------------|------|--------|------|-------|--------------|------------|---------|------|----------------|
| RF00177_206_2Z4M_419_423_456_461      | 1943 | 107620 | 675  | 52713 | 2.936243e-15 | 1.409915   | 11/10   | 1    | 1.84983309e-13 |
| RF00177_235_2HHH_1380_1383_1471_1475  | 230  | 109333 | 62   | 53326 | 9.001215e-06 | 1.809349   | 9/6     | 2    | 0.00028        |
| RF00177_145_2QBF_1222_1228_1259_1265  | 540  | 109023 | 190  | 53198 | 4.452943e-05 | 1.386827   | 14/10   | 3    | 0.00094        |
| RF00177_955_2HHH_436_440_463_468      | 817  | 108746 | 310  | 53078 | 7.424164e-05 | 1.286305   | 11/7    | 4    | 0.00102        |
| RF00177_874_2F4V_1225_1231_1262_1268  | 534  | 109029 | 190  | 53198 | 8.068326e-05 | 1.371349   | 14/8    | 5    | 0.00102        |
| RF00001_1334_2GYC_21_28_52_58         | 1749 | 107814 | 728  | 52660 | 0.0002       | 1.173433   | 15/7    | 6    | 0.00152        |
| RF00001_196_2QBE_69_77_95_103         | 2941 | 106622 | 1273 | 52115 | 0.0002       | 1.129222   | 21/16   | 7    | 0.00152        |
| RF00001_5_1N8R_75_81_101_106          | 1160 | 108403 | 471  | 52917 | 0.0004       | 1.202217   | 15/12   | 8    | 0.00300        |
| RF00177_831_2V48_435_440_463_469      | 357  | 109206 | 125  | 53263 | 0.0007       | 1.39297    | 13/6    | 9    | 0.00467        |
| RF00001_449_3CCQ_32_37_43_48          | 3830 | 105733 | 1714 | 51674 | 0.0014       | 1.092075   | 12/8    | 10   | 0.00910        |
| RF00015_758_2OZB_28_34_42_45          | 2412 | 107151 | 1058 | 52330 | 0.0020       | 1.113381   | 11/8    | 11   | 0.01135        |
| RF00167_327_1Y26_26_29_49_56          | 428  | 109135 | 168  | 53220 | 0.0090       | 1.24232    | 12/6    | 12   | 0.04731        |
| RF00177_35_2B9M_757_761_777_781       | 692  | 108871 | 287  | 53101 | 0.0111       | 1.176004   | 10/10   | 13   | 0.05357        |
| RF00001_1060_3BBO_68_77_96_105        | 874  | 108689 | 377  | 53011 | 0.0246       | 1.130701   | 23/14   | 14   | 0.11051        |
| RF00177_32_1VOX_748_752_768_772       | 603  | 108960 | 259  | 53129 | 0.0469       | 1.135217   | 10/8    | 15   | 0.19707        |
| RF00177_1114_2VHP_1404_1410_1441_1446 | 1121 | 108442 | 500  | 52888 | 0.0513       | 1.093437   | 13/6    | 16   | 0.20208        |
| RF00177_90_1HNW_1281_1285_1308_1312   | 200  | 109363 | 79   | 53309 | 0.0629       | 1.23402    | 10/10   | 17   | 0.23302        |
| RF00177_11_2VHP_752_756_772_776       | 595  | 108968 | 260  | 53128 | 0.0752       | 1.115748   | 10/6    | 18   | 0.25353        |
| RF00017_631_2J37_181_187_212_216      | 3040 | 106523 | 1415 | 51973 | 0.0765       | 1.04822    | 12/6    | 19   | 0.25353        |
| RF00162_600_2GIS_17_21_32_39          | 772  | 108791 | 345  | 53043 | 0.0948       | 1.091019   | 13/11   | 20   | 0.29857        |
| RF00177_284_2QBJ_1099_1104_1118_1124  | 268  | 109295 | 117  | 53271 | 0.1740       | 1.116445   | 13/9    | 21   | 0.52206        |
| RF00177_1166_2UXD_1224_1231_1262_1269 | 285  | 109278 | 126  | 53262 | 0.1958       | 1.102446   | 16/8    | 22   | 0.55946        |
| RF00177_192_2QBD_657_661_672_679      | 55   | 109508 | 21   | 53367 | 0.2042       | 1.276306   | 13/10   | 23   | 0.55946        |
| RF00177_418_1S1H_661_665_676_683      | 59   | 109504 | 24   | 53364 | 0.2671       | 1.197986   | 13/11   | 24   | 0.63832        |
| RF00177_751_1IBL_660_665_676_684      | 6    | 109557 | 1    | 53387 | 0.2740       | 2.923774   | 15/10   | 25   | 0.63832        |
| RF01857_613_1QZW_192_198_207_213      | 18   | 109545 | 6    | 53382 | 0.2828       | 1.461916   | 14/6    | 26   | 0.63832        |
| RF00177_1127_2VHO_1404_1411_1440_1446 | 283  | 109280 | 129  | 53259 | 0.2836       | 1.069174   | 15/6    | 27   | 0.63832        |
| RF00177_942_1N36_137_143_158_165      | 13   | 109550 | 4    | 53384 | 0.2985       | 1.583729   | 15/8    | 28   | 0.63832        |
| RF00177_857_3BBN_130_136_151_158      | 13   | 109550 | 4    | 53384 | 0.2985       | 1.583729   | 15/6    | 29   | 0.63832        |
| RF00177_524_1VOV_400_408_417_424      | 3    | 109560 | 0    | 53388 | 0.3040       | Inf        | 17/6    | 30   | 0.63832        |
| RF00177_231_2GYB_766_770_786_790      | 640  | 108923 | 302  | 53086 | 0.3360       | 1.032813   | 10/8    | 31   | 0.68279        |
| RF00177_244_3DF3_1278_1282_1305_1309  | 150  | 109413 | 70   | 53318 | 0.4133       | 1.044234   | 10/8    | 32   | 0.79271        |
| RF00177_1012_3FIH_120_126_141_148     | 13   | 109550 | 5    | 53383 | 0.4325       | 1.266921   | 15/10   | 33   | 0.79271        |
| RF00177_1369_2GY9_669_675_686_695     | 2    | 109561 | 0    | 53388 | 0.4521       | Inf        | 17/8    | 34   | 0.79271        |
| RF00177_698_2B64_481_491_518_522      | 2    | 109561 | 0    | 53388 | 0.4521       | Inf        | 16/9    | 35   | 0.79271        |
| RF00177_324_1VS5_475_484_513_516      | 4    | 109559 | 1    | 53387 | 0.4722       | 1.949152   | 14/9    | 36   | 0.79271        |
| RF00177_1124_2VHP_419_427_452_461     | 8    | 109555 | 3    | 53385 | 0.4889       | 1.299487   | 19/8    | 37   | 0.79271        |
| RF00177_1595_1N34_1100_1107_1122_1131 | 8    | 109555 | 3    | 53385 | 0.4889       | 1.299487   | 18/6    | 38   | 0.79271        |
| RF00017_1608_1L9A_190_194_205_209     | 226  | 109337 | 109  | 53279 | 0.4907       | 1.010351   | 10/8    | 39   | 0.79271        |
| RF00177_1303_2HHH_138_143_158_164     | 60   | 109503 | 29   | 53359 | 0.5358       | 1.008175   | 13/10   | 40   | 0.84388        |
| RF00177_325_1VS5_121_126_141_147      | 59   | 109504 | 29   | 53359 | 0.5653       | 0.9913607  | 13/10   | 41   | 0.86867        |
| RF00177_36_2QB9_862_869_880_885       | 14   | 109549 | 7    | 53381 | 0.6225       | 0.9745384  | 14/12   | 42   | 0.91260        |
| RF00177_1312_2HGR_59_65_89_93         | 61   | 109502 | 31   | 53357 | 0.6229       | 0.9588287  | 13/11   | 43   | 0.91260        |
| RF00177_171_1HR0_804_807_829_846      | 1    | 109562 | 0    | 53388 | 0.6724       | Inf        | 22/9    | 44   | 0.91356        |
| RF00177_1133_2VHO_380_389_400_408     | 1    | 109562 | 0    | 53388 | 0.6724       | Inf        | 19/8    | 45   | 0.91356        |
| RF00177_351_1I95_804_807_829_846      | 1    | 109562 | 0    | 53388 | 0.6724       | Inf        | 22/8    | 46   | 0.91356        |
| RF00177_495_2B64_859_866_877_882      | 13   | 109550 | 7    | 53381 | 0.6815       | 0.9049436  | 14/8    | 47   | 0.91356        |
| RF00177_1_2GYB_490_498_527_529        | 9    | 109554 | 5    | 53383 | 0.7062       | 0.8771036  | 12/7    | 48   | 0.92684        |
| RF00177_432_2QP0_215_220_250_257      | 32   | 109531 | 19   | 53369 | 0.7989       | 0.8206494  | 14/11   | 49   | 1.00000        |
| RF00177_1_1J5E_482_490_519_521        | 10   | 109553 | 7    | 53381 | 0.8411       | 0.6960716  | 12/7    | 50   | 1.00000        |
| RF00177_243_2QBB_382_389_400_406      | 5    | 109558 | 4    | 53384 | 0.8638       | 0.6090734  | 15/9    | 51   | 1.00000        |
| RF00177_334_1HNW_233_238_268_275      | 25   | 109538 | 17   | 53371 | 0.8892       | 0.716505   | 14/10   | 52   | 1.00000        |
| RF00177_1592_1N36_436_445_457_468     | 2    | 109561 | 2    | 53386 | 0.8939       | 0.487261   | 22/8    | 53   | 1.00000        |
| RF00169_236_1CQ5_37_41_52_56          | 98   | 109465 | 60   | 53328 | 0.9294       | 0.7957331  | 10/6    | 54   | 1.00000        |
| RF00177_579_2J02_440_446_456_463      | 850  | 108713 | 454  | 52934 | 0.9463       | 0.9116285  | 15/8    | 55   | 1.00000        |
| RF00177_1167_2UXD_399_407_418_425     | 1    | 109562 | 3    | 53385 | 0.9885       | 0.1624236  | 17/6    | 56   | 1.00000        |
| RF00177_87_2QAN_541_548_855_857       | 10   | 109553 | 16   | 53372 | 0.9993       | 0.3044897  | 11/7    | 57   | 1.00000        |
| RF00011_1583_1NBS_177_190_209_219     | 0    | 109563 | 0    | 53388 | 1.0000       | 0          | 25/7    | 58   | 1.00000        |
| RF01118_270_2QBC_13_17_35_55          | 0    | 109563 | 0    | 53388 | 1.0000       | 0          | 26/10   | 59   | 1.00000        |
| RF00177_437_2QBF_488_495_500_509      | 0    | 109563 | 0    | 53388 | 1.0000       | 0          | 18/11   | 60   | 1.00000        |
| RF00177_551_2UXD_494_500_507_515      | 0    | 109563 | 0    | 53388 | 1.0000       | 0          | 16/8    | 61   | 1.00000        |
| RF00177_1470_1XNQ_1103_1111_1121_1128 | 0    | 109563 | 1    | 53387 | 1.0000       | 0          | 17/6    | 62   | 1.00000        |
| RF00059_318_2GDI_55_59_72_76          | 5868 | 103695 | 3210 | 50178 | 1.0000       | 0.8845932  | 10/6    | 63   | 1.00000        |

Table B: Fisher’s exact test following the FET scheme (see Supplementary Material S6) for  $mRm_{IL}$  models for SSSIz and original data of order R. Yellow highlighted rows have a significant p-value after multiple testing correction using the Benjamini-Hochberg procedure at a 5% false discovery rate (adjusted p-value). “Nuc./Pb” denotes the total strand length and the number of paired bases.

| ModelID                               | A    | B      | C    | D     | P-value      | Odds ratio | Nuc./Pb | Rank | Adj. p-value   |
|---------------------------------------|------|--------|------|-------|--------------|------------|---------|------|----------------|
| RF00177_206_2Z4M_419_423_456_461      | 1998 | 108853 | 675  | 52713 | 9.580057e-17 | 1.433402   | 11/10   | 1    | 6.03543591e-15 |
| RF00177_235_2HHH_1380_1383_1471_1475  | 240  | 110611 | 62   | 53326 | 2.603918e-06 | 1.866202   | 9/6     | 2    | 8.2023417e-05  |
| RF00177_955_2HHH_436_440_463_468      | 857  | 109994 | 310  | 53078 | 5.656643e-06 | 1.334064   | 11/7    | 3    | 0.00011        |
| RF00177_145_2QBF_1222_1228_1259_1265  | 564  | 110287 | 190  | 53198 | 6.964733e-06 | 1.431847   | 14/10   | 4    | 0.00011        |
| RF00177_874_2F4V_1225_1231_1262_1268  | 557  | 110294 | 190  | 53198 | 1.460138e-05 | 1.413994   | 14/8    | 5    | 0.00018        |
| RF00001_1334_2GYC_21_28_52_58         | 1784 | 109067 | 728  | 52660 | 6.815661e-05 | 1.183163   | 15/7    | 6    | 0.00072        |
| RF00001_196_2QBE_69_77_95_103         | 2980 | 107871 | 1273 | 52115 | 0.0001       | 1.130948   | 21/16   | 7    | 0.00123        |
| RF00001_5_1N8R_75_81_101_106          | 1167 | 109684 | 471  | 52917 | 0.0006       | 1.195349   | 15/12   | 8    | 0.00435        |
| RF00001_449_3CCQ_32_37_43_48          | 3886 | 106965 | 1714 | 51674 | 0.0010       | 1.095269   | 12/8    | 9    | 0.00709        |
| RF00177_831_2V48_435_440_463_469      | 352  | 110499 | 125  | 53263 | 0.0016       | 1.357407   | 13/6    | 10   | 0.00969        |
| RF00167_327_1Y26_26_29_49_56          | 454  | 110397 | 168  | 53220 | 0.0017       | 1.302807   | 12/6    | 11   | 0.00969        |
| RF00015_758_2QZB_28_34_42_45          | 2423 | 108428 | 1058 | 52330 | 0.0036       | 1.105288   | 11/8    | 12   | 0.01906        |
| RF00177_35_2B9M_757_761_777_781       | 706  | 110145 | 287  | 53101 | 0.0078       | 1.185917   | 10/10   | 13   | 0.03672        |
| RF00177_32_1VOX_748_752_768_772       | 642  | 110209 | 259  | 53129 | 0.0082       | 1.194931   | 10/8    | 14   | 0.03672        |
| RF00177_11_2VHP_752_756_772_776       | 633  | 110218 | 260  | 53128 | 0.0158       | 1.173535   | 10/6    | 15   | 0.06639        |
| RF00001_1060_3BBO_68_77_96_105        | 881  | 109970 | 377  | 53011 | 0.0282       | 1.126481   | 23/14   | 16   | 0.11085        |
| RF00177_90_1HNW_1281_1285_1308_1312   | 210  | 110641 | 79   | 53309 | 0.0333       | 1.280741   | 10/10   | 17   | 0.12344        |
| RF00177_1114_2VHP_1404_1410_1441_1446 | 1140 | 109711 | 500  | 52888 | 0.0415       | 1.099108   | 13/6    | 18   | 0.14519        |
| RF00017_631_2J37_181_187_212_216      | 3078 | 107773 | 1415 | 51973 | 0.0728       | 1.049013   | 12/6    | 19   | 0.24125        |
| RF00177_1166_2UXD_1224_1231_1262_1269 | 304  | 110547 | 126  | 53262 | 0.0847       | 1.162436   | 16/8    | 20   | 0.26668        |
| RF00162_600_2GIS_17_21_32_39          | 779  | 110072 | 345  | 53043 | 0.1017       | 1.088099   | 13/11   | 21   | 0.30502        |
| RF00177_231_2GYB_766_770_786_790      | 680  | 110171 | 302  | 53086 | 0.1265       | 1.08496    | 10/8    | 22   | 0.36217        |
| RF00177_284_2QBJ_1099_1104_1118_1124  | 275  | 110576 | 117  | 53271 | 0.1417       | 1.132333   | 13/9    | 23   | 0.38827        |
| RF00177_192_2QBD_657_661_672_679      | 55   | 110796 | 21   | 53367 | 0.2179       | 1.261476   | 13/10   | 24   | 0.56102        |
| RF00177_1127_2VHO_1404_1411_1440_1446 | 292  | 110559 | 129  | 53259 | 0.2226       | 1.090413   | 15/6    | 25   | 0.56102        |
| RF00177_942_1N36_137_143_158_165      | 14   | 110837 | 4    | 53384 | 0.2542       | 1.68575    | 15/8    | 26   | 0.59320        |
| RF00177_857_3BBN_130_136_151_158      | 14   | 110837 | 4    | 53384 | 0.2542       | 1.68575    | 15/6    | 27   | 0.59320        |
| RF00177_751_1IBL_660_665_676_684      | 6    | 110845 | 1    | 53387 | 0.2789       | 2.889801   | 15/10   | 28   | 0.61637        |
| RF00177_418_1S1H_661_665_676_683      | 59   | 110792 | 24   | 53364 | 0.2837       | 1.184063   | 13/11   | 29   | 0.61637        |
| RF00177_244_3DF3_1278_1282_1305_1309  | 157  | 110694 | 70   | 53318 | 0.3228       | 1.080315   | 10/8    | 30   | 0.67795        |
| RF00177_1012_3FIH_120_126_141_148     | 14   | 110837 | 5    | 53383 | 0.3808       | 1.348615   | 15/10   | 31   | 0.77393        |
| RF01857_613_1QZV_192_198_207_213      | 16   | 110835 | 6    | 53382 | 0.3934       | 1.284313   | 14/6    | 32   | 0.77459        |
| RF00177_1595_1N34_1100_1107_1122_1131 | 9    | 110842 | 3    | 53385 | 0.4170       | 1.444895   | 18/6    | 33   | 0.79124        |
| RF00177_1369_2GY9_669_675_686_695     | 2    | 110849 | 0    | 53388 | 0.4555       | Inf        | 17/8    | 34   | 0.79124        |
| RF00177_524_1VOV_400_408_417_424      | 2    | 110849 | 0    | 53388 | 0.4555       | Inf        | 17/6    | 35   | 0.79124        |
| RF00177_698_2B64_481_491_518_522      | 2    | 110849 | 0    | 53388 | 0.4555       | Inf        | 16/9    | 36   | 0.79124        |
| RF00177_1303_2HHH_138_143_158_164     | 63   | 110788 | 29   | 53359 | 0.4692       | 1.046302   | 13/10   | 37   | 0.79124        |
| RF00177_324_1VS5_475_484_513_516      | 4    | 110847 | 1    | 53387 | 0.4773       | 1.926504   | 14/9    | 38   | 0.79124        |
| RF00177_1124_2VHP_419_427_452_461     | 8    | 110843 | 3    | 53385 | 0.4964       | 1.284293   | 19/8    | 39   | 0.79124        |
| RF00177_1312_2HGR_59_65_89_93         | 66   | 110785 | 31   | 53357 | 0.5024       | 1.02542    | 13/11   | 40   | 0.79124        |
| RF00017_1608_1L9A_190_194_205_209     | 225  | 110626 | 109  | 53279 | 0.5459       | 0.9941568  | 10/8    | 41   | 0.83457        |
| RF00177_325_1VS5_121_126_141_147      | 60   | 110791 | 29   | 53359 | 0.5564       | 0.9964522  | 13/10   | 42   | 0.83457        |
| RF00177_36_2QB9_862_869_880_885       | 14   | 110837 | 7    | 53381 | 0.6322       | 0.9632517  | 14/12   | 43   | 0.90470        |
| RF00177_1_2GYB_490_498_527_529        | 10   | 110841 | 5    | 53383 | 0.6448       | 0.963253   | 12/7    | 44   | 0.90470        |
| RF00177_171_1HR0_804_807_829_846      | 1    | 110850 | 0    | 53388 | 0.6749       | Inf        | 22/9    | 45   | 0.90470        |
| RF00177_1133_2VHO_380_389_400_408     | 1    | 110850 | 0    | 53388 | 0.6749       | Inf        | 19/8    | 46   | 0.90470        |
| RF00177_351_1I95_804_807_829_846      | 1    | 110850 | 0    | 53388 | 0.6749       | Inf        | 22/8    | 47   | 0.90470        |
| RF00177_432_2QP0_215_220_250_257      | 35   | 110816 | 19   | 53369 | 0.7179       | 0.8871643  | 14/11   | 48   | 0.94226        |
| RF00177_495_2B64_859_866_877_882      | 12   | 110839 | 7    | 53381 | 0.7466       | 0.8256315  | 14/8    | 49   | 0.95991        |
| RF00177_1_1J5E_482_490_519_521        | 10   | 110841 | 7    | 53381 | 0.8467       | 0.6879856  | 12/7    | 50   | 1.00000        |
| RF00177_334_1HNW_233_238_268_275      | 27   | 110824 | 17   | 53371 | 0.8482       | 0.7648989  | 14/10   | 51   | 1.00000        |
| RF00177_243_2QBB_382_389_400_406      | 5    | 110846 | 4    | 53384 | 0.8676       | 0.6019973  | 15/9    | 52   | 1.00000        |
| RF00177_1592_1N36_436_445_457_468     | 2    | 110849 | 2    | 53386 | 0.8961       | 0.4816001  | 22/8    | 53   | 1.00000        |
| RF00169_236_1CQ5_37_41_52_56          | 100  | 110751 | 60   | 53328 | 0.9229       | 0.8025432  | 10/6    | 54   | 1.00000        |
| RF00177_579_2J02_440_446_456_463      | 863  | 109988 | 454  | 52934 | 0.9399       | 0.9148414  | 15/8    | 55   | 1.00000        |
| RF00177_1167_2UXD_399_407_418_425     | 1    | 110850 | 3    | 53385 | 0.9888       | 0.1605365  | 17/6    | 56   | 1.00000        |
| RF00177_87_2QAN_541_548_855_857       | 10   | 110841 | 16   | 53372 | 0.9994       | 0.3009515  | 11/7    | 57   | 1.00000        |
| RF00059_318_2GDI_55_59_72_76          | 5955 | 104896 | 3210 | 50178 | 1.0000       | 0.8874299  | 10/6    | 58   | 1.00000        |
| RF00011_1583_1NBS_177_190_209_219     | 0    | 110851 | 0    | 53388 | 1.0000       | 0          | 25/7    | 59   | 1.00000        |
| RF01118_270_2QBC_13_17_35_55          | 0    | 110851 | 0    | 53388 | 1.0000       | 0          | 26/10   | 60   | 1.00000        |
| RF00177_437_2QBF_488_495_500_509      | 0    | 110851 | 0    | 53388 | 1.0000       | 0          | 18/11   | 61   | 1.00000        |
| RF00177_551_2UXD_494_500_507_515      | 0    | 110851 | 0    | 53388 | 1.0000       | 0          | 16/8    | 62   | 1.00000        |
| RF00177_1470_1XNQ_1103_1111_1121_1128 | 0    | 110851 | 1    | 53387 | 1.0000       | 0          | 17/6    | 63   | 1.00000        |

Table C: Results of Fisher’s exact test according to FET scheme (see Supplementary Material S6) for mRm<sub>IL</sub> module predictions of all mRm<sub>IL</sub> models together on SISSIz and original data of order L and R.

| order | model | A     | B     | C     | D     | p.value      | odds.ratio |
|-------|-------|-------|-------|-------|-------|--------------|------------|
| H     | all   | 24956 | 87104 | 11401 | 41987 | 1.312117e-05 | 1.055145   |
| L     | all   | 25000 | 84563 | 11401 | 41987 | 1.312126e-11 | 1.08878    |
| R     | all   | 25263 | 85588 | 11401 | 41987 | 2.817419e-11 | 1.087056   |

Table D: Results of Fisher’s exact test according to FET scheme (see Supplementary Material S6) for JAR3D IL module predictions on SISSIz and original data of order L. Red highlighted rows have a significant p-value after multiple testing correction using the Benjamini-Hochberg procedure at a 5% false discovery rate (adjusted p-value) and average 3D sequence length  $\geq 9$ . “Nuc./Bp” denotes the total strand length and the number of base pairs.

| ModelID     | A    | B      | C   | D     | P-value      | Odds ratio | Nuc./Bp | Rank | Adj. p-value         |
|-------------|------|--------|-----|-------|--------------|------------|---------|------|----------------------|
| IL_47875.1  | 528  | 109035 | 149 | 53239 | 4.223527e-10 | 1.730255   | 4/2     | 1    | 1.165693452e-07      |
| IL_96206.3  | 283  | 109280 | 63  | 53325 | 9.451579e-10 | 2.191967   | 5/4     | 2    | 1.304317902e-07      |
| IL_73000.2  | 246  | 109317 | 54  | 53334 | 7.193293e-09 | 2.222572   | 6/4     | 3    | 6.61782956e-07       |
| IL_92109.3  | 502  | 109061 | 150 | 53238 | 2.729099e-08 | 1.633667   | 4/2     | 4    | 1.88307831e-06       |
| IL_28947.2  | 318  | 109245 | 83  | 53305 | 5.78305e-08  | 1.86945    | 4/2     | 5    | 3.1922436e-06        |
| IL_97217.11 | 330  | 109233 | 92  | 53296 | 4.42249e-07  | 1.75011    | 4/2     | 6    | 2.0343454e-05        |
| IL_56465.4  | 467  | 109096 | 146 | 53242 | 7.53791e-07  | 1.56102    | 5/2     | 7    | 2.97209022857143e-05 |
| IL_58586.2  | 282  | 109281 | 77  | 53311 | 1.45476e-06  | 1.786607   | 6/2     | 8    | 5.018922e-05         |
| IL_39199.4  | 262  | 109301 | 72  | 53316 | 4.093697e-06 | 1.77501    | 5/4     | 9    | 0.00013              |
| IL_94430.5  | 339  | 109224 | 102 | 53286 | 5.694159e-06 | 1.621412   | 5/3     | 10   | 0.00016              |
| IL_23448.1  | 86   | 109477 | 13  | 53375 | 6.542763e-06 | 3.225275   | 6/2     | 11   | 0.00016              |
| IL_25300.3  | 278  | 109285 | 81  | 53307 | 1.385853e-05 | 1.674103   | 4/2     | 12   | 0.00032              |
| IL_58291.4  | 121  | 109442 | 25  | 53363 | 1.661174e-05 | 2.359932   | 6/2     | 13   | 0.00035              |
| IL_73276.5  | 176  | 109387 | 44  | 53344 | 1.848308e-05 | 1.950645   | 7/5     | 14   | 0.00036              |
| IL_28644.1  | 144  | 109419 | 33  | 53355 | 2.0099e-05   | 2.127791   | 5/2     | 15   | 0.00037              |
| IL_67887.1  | 203  | 109360 | 55  | 53333 | 3.310894e-05 | 1.799987   | 5/3     | 16   | 0.00057              |
| IL_70173.1  | 171  | 109392 | 44  | 53344 | 4.483946e-05 | 1.895142   | 6/2     | 17   | 0.00073              |
| IL_44540.4  | 198  | 109365 | 55  | 53333 | 7.403848e-05 | 1.755572   | 5/4     | 18   | 0.00114              |
| IL_69799.1  | 112  | 109451 | 25  | 53363 | 0.0001       | 2.184221   | 5/2     | 19   | 0.00159              |
| IL_92027.3  | 146  | 109417 | 37  | 53351 | 0.0001       | 1.924009   | 6/4     | 20   | 0.00163              |
| IL_46648.6  | 210  | 109353 | 62  | 53326 | 0.0002       | 1.651713   | 5/3     | 21   | 0.00259              |
| IL_87904.5  | 1109 | 108454 | 444 | 52944 | 0.0002       | 1.219298   | 10/5    | 22   | 0.00259              |
| IL_01080.1  | 203  | 109360 | 60  | 53328 | 0.0003       | 1.649834   | 7/2     | 23   | 0.00310              |
| IL_02809.3  | 225  | 109338 | 69  | 53319 | 0.0003       | 1.590168   | 8/4     | 24   | 0.00352              |
| IL_40845.1  | 170  | 109393 | 48  | 53340 | 0.0003       | 1.72691    | 7/4     | 25   | 0.00352              |
| IL_23262.4  | 433  | 109130 | 154 | 53234 | 0.0003       | 1.371574   | 10/3    | 26   | 0.00370              |
| IL_79083.3  | 622  | 108941 | 236 | 53152 | 0.0005       | 1.285847   | 11/4    | 27   | 0.00498              |
| IL_86357.3  | 76   | 109487 | 16  | 53372 | 0.0007       | 2.315487   | 6/3     | 28   | 0.00728              |
| IL_21333.2  | 238  | 109325 | 77  | 53311 | 0.0008       | 1.50724    | 8/4     | 29   | 0.00753              |
| IL_43316.1  | 806  | 108757 | 320 | 53068 | 0.0009       | 1.228994   | 10/4    | 30   | 0.00836              |
| IL_74876.2  | 830  | 108733 | 332 | 53056 | 0.0011       | 1.219841   | 10/4    | 31   | 0.01000              |
| IL_24982.5  | 1301 | 108262 | 545 | 52843 | 0.0014       | 1.165164   | 10/5    | 32   | 0.01221              |
| IL_63133.1  | 48   | 109515 | 8   | 53380 | 0.0015       | 2.924512   | 6/3     | 33   | 0.01221              |
| IL_39980.1  | 102  | 109461 | 27  | 53361 | 0.0021       | 1.841617   | 6/3     | 34   | 0.01696              |

Continued on next page

Table D – continued from previous page

| ModelID     | A    | B      | C    | D     | P-value | Odds ratio | Nuc./Bp | Rank | Adj. p-value |
|-------------|------|--------|------|-------|---------|------------|---------|------|--------------|
| IL_87065.1  | 131  | 109432 | 38   | 53350 | 0.0022  | 1.680647   | 5/3     | 35   | 0.01706      |
| IL_83856.1  | 522  | 109041 | 201  | 53187 | 0.0022  | 1.266705   | 12/6    | 36   | 0.01706      |
| IL_90459.3  | 463  | 109100 | 176  | 53212 | 0.0025  | 1.283029   | 6/3     | 37   | 0.01842      |
| IL_63952.1  | 495  | 109068 | 191  | 53197 | 0.0030  | 1.264001   | 13/4    | 38   | 0.02206      |
| IL_80348.3  | 176  | 109387 | 57   | 53331 | 0.0036  | 1.505396   | 5/2     | 39   | 0.02539      |
| IL_47174.11 | 266  | 109297 | 94   | 53294 | 0.0037  | 1.379845   | 6/3     | 40   | 0.02539      |
| IL_12147.1  | 196  | 109367 | 66   | 53322 | 0.0047  | 1.447876   | 6/3     | 41   | 0.03169      |
| IL_34628.2  | 46   | 109517 | 9    | 53379 | 0.0051  | 2.491159   | 12/6    | 42   | 0.03367      |
| IL_88119.1  | 180  | 109383 | 60   | 53328 | 0.0055  | 1.462601   | 6/3     | 43   | 0.03513      |
| IL_98421.4  | 101  | 109462 | 29   | 53359 | 0.0060  | 1.697721   | 7/2     | 44   | 0.03713      |
| IL_91089.1  | 39   | 109524 | 7    | 53381 | 0.0061  | 2.715446   | 8/2     | 45   | 0.03713      |
| IL_80494.2  | 465  | 109098 | 182  | 53206 | 0.0062  | 1.245986   | 12/5    | 46   | 0.03713      |
| IL_37406.1  | 81   | 109482 | 22   | 53366 | 0.0075  | 1.794662   | 7/2     | 47   | 0.04400      |
| IL_43877.1  | 83   | 109480 | 23   | 53365 | 0.0084  | 1.759019   | 6/2     | 48   | 0.04826      |
| IL_82444.1  | 171  | 109392 | 58   | 53330 | 0.0089  | 1.437319   | 6/3     | 49   | 0.05000      |
| IL_42251.1  | 192  | 109371 | 67   | 53321 | 0.0097  | 1.397098   | 6/3     | 50   | 0.05357      |
| IL_68767.1  | 95   | 109468 | 28   | 53360 | 0.0101  | 1.653838   | 6/2     | 51   | 0.05367      |
| IL_21639.1  | 43   | 109520 | 9    | 53379 | 0.0101  | 2.328632   | 9/3     | 52   | 0.05367      |
| IL_26971.1  | 834  | 108729 | 351  | 53037 | 0.0108  | 1.159012   | 10/3    | 53   | 0.05509      |
| IL_17212.2  | 203  | 109360 | 72   | 53316 | 0.0108  | 1.374579   | 6/3     | 54   | 0.05509      |
| IL_63253.1  | 85   | 109478 | 25   | 53363 | 0.0141  | 1.657261   | 6/2     | 55   | 0.07005      |
| IL_37325.1  | 50   | 109513 | 12   | 53376 | 0.0144  | 2.030801   | 7/4     | 56   | 0.07005      |
| IL_18675.1  | 90   | 109473 | 27   | 53361 | 0.0145  | 1.62478    | 7/2     | 57   | 0.07005      |
| IL_86059.1  | 104  | 109459 | 33   | 53355 | 0.0172  | 1.536179   | 4/2     | 58   | 0.08064      |
| IL_37197.1  | 642  | 108921 | 268  | 53120 | 0.0172  | 1.168265   | 11/4    | 59   | 0.08064      |
| IL_46721.1  | 91   | 109472 | 28   | 53360 | 0.0182  | 1.584145   | 10/3    | 60   | 0.08356      |
| IL_06808.1  | 82   | 109481 | 25   | 53363 | 0.0222  | 1.598726   | 8/4     | 61   | 0.09931      |
| IL_55938.4  | 286  | 109277 | 111  | 53277 | 0.0223  | 1.256148   | 7/4     | 62   | 0.09931      |
| IL_13777.1  | 114  | 109449 | 38   | 53350 | 0.0235  | 1.462322   | 5/2     | 63   | 0.10167      |
| IL_16166.4  | 131  | 109432 | 45   | 53343 | 0.0236  | 1.419036   | 5/2     | 64   | 0.10167      |
| IL_13959.4  | 157  | 109406 | 56   | 53332 | 0.0246  | 1.366679   | 8/4     | 65   | 0.10429      |
| IL_55649.1  | 379  | 109184 | 153  | 53235 | 0.0262  | 1.207752   | 8/3     | 66   | 0.10948      |
| IL_09587.1  | 2631 | 106932 | 1199 | 52189 | 0.0266  | 1.070957   | 11/4    | 67   | 0.10964      |
| IL_31006.1  | 174  | 109389 | 64   | 53324 | 0.0297  | 1.325353   | 11/5    | 68   | 0.12065      |
| IL_70237.3  | 893  | 108670 | 388  | 53000 | 0.0305  | 1.122493   | 10/4    | 69   | 0.12205      |
| IL_39585.1  | 972  | 108591 | 425  | 52963 | 0.0320  | 1.11546    | 10/6    | 70   | 0.12441      |
| IL_57364.1  | 26   | 109537 | 5    | 53383 | 0.0321  | 2.534211   | 8/4     | 71   | 0.12441      |
| IL_15205.1  | 116  | 109447 | 40   | 53348 | 0.0331  | 1.413561   | 12/5    | 72   | 0.12441      |
| IL_37104.3  | 182  | 109381 | 68   | 53320 | 0.0338  | 1.304747   | 6/3     | 73   | 0.12441      |
| IL_41766.6  | 337  | 109226 | 136  | 53252 | 0.0339  | 1.208071   | 8/4     | 74   | 0.12441      |
| IL_15840.2  | 686  | 108877 | 294  | 53094 | 0.0341  | 1.137844   | 11/6    | 75   | 0.12441      |
| IL_31066.3  | 40   | 109523 | 10   | 53378 | 0.0343  | 1.949464   | 5/2     | 76   | 0.12441      |
| IL_90133.3  | 145  | 109418 | 53   | 53335 | 0.0407  | 1.333607   | 7/3     | 77   | 0.14596      |
| IL_95150.6  | 65   | 109498 | 20   | 53368 | 0.0419  | 1.584006   | 7/3     | 78   | 0.14814      |
| IL_06471.1  | 468  | 109095 | 197  | 53191 | 0.0449  | 1.158267   | 10/7    | 79   | 0.15660      |
| IL_69106.1  | 181  | 109382 | 69   | 53319 | 0.0456  | 1.278644   | 7/3     | 80   | 0.15660      |
| IL_39355.1  | 328  | 109235 | 134  | 53254 | 0.0460  | 1.193308   | 8/3     | 81   | 0.15660      |
| IL_06177.1  | 38   | 109525 | 10   | 53378 | 0.0501  | 1.851958   | 6/2     | 82   | 0.16799      |
| IL_05684.1  | 223  | 109340 | 88   | 53300 | 0.0513  | 1.235263   | 8/3     | 83   | 0.16799      |
| IL_61730.1  | 24   | 109539 | 5    | 53383 | 0.0514  | 2.339232   | 11/3    | 84   | 0.16799      |
| IL_31039.1  | 56   | 109507 | 17   | 53371 | 0.0517  | 1.605467   | 7/3     | 85   | 0.16799      |
| IL_31663.1  | 90   | 109473 | 31   | 53357 | 0.0551  | 1.415036   | 7/4     | 86   | 0.17680      |
| IL_98566.1  | 75   | 109488 | 25   | 53363 | 0.0584  | 1.462157   | 8/2     | 87   | 0.18527      |
| IL_80093.1  | 609  | 108954 | 264  | 53124 | 0.0591  | 1.124756   | 10/5    | 88   | 0.18535      |
| IL_69536.1  | 1053 | 108510 | 471  | 52917 | 0.0631  | 1.090264   | 8/3     | 89   | 0.19566      |
| IL_50911.1  | 34   | 109529 | 9    | 53379 | 0.0642  | 1.841095   | 7/3     | 90   | 0.19605      |
| IL_56513.1  | 91   | 109472 | 32   | 53356 | 0.0649  | 1.386046   | 5/2     | 91   | 0.19605      |
| IL_05723.1  | 461  | 109102 | 197  | 53191 | 0.0654  | 1.140872   | 10/5    | 92   | 0.19605      |
| IL_34363.2  | 20   | 109543 | 4    | 53384 | 0.0664  | 2.436656   | 13/9    | 93   | 0.19708      |

Continued on next page

Table D – continued from previous page

| ModelID    | A    | B      | C   | D     | P-value | Odds ratio | Nuc./Bp | Rank | Adj. p-value |
|------------|------|--------|-----|-------|---------|------------|---------|------|--------------|
| IL_54450.1 | 39   | 109524 | 11  | 53377 | 0.0672  | 1.727887   | 8/3     | 94   | 0.19739      |
| IL_20775.1 | 63   | 109500 | 21  | 53367 | 0.0785  | 1.462106   | 7/3     | 95   | 0.22750      |
| IL_41791.1 | 58   | 109505 | 19  | 53369 | 0.0797  | 1.487745   | 11/8    | 96   | 0.22750      |
| IL_85510.1 | 656  | 108907 | 289 | 53099 | 0.0805  | 1.106712   | 6/2     | 97   | 0.22750      |
| IL_80714.1 | 448  | 109115 | 193 | 53195 | 0.0812  | 1.131629   | 12/3    | 98   | 0.22750      |
| IL_97509.1 | 703  | 108860 | 311 | 53077 | 0.0816  | 1.102126   | 10/5    | 99   | 0.22750      |
| IL_17066.1 | 67   | 109496 | 23  | 53365 | 0.0873  | 1.419734   | 6/3     | 100  | 0.24106      |
| IL_12211.1 | 123  | 109440 | 47  | 53341 | 0.0887  | 1.27549    | 12/6    | 101  | 0.24243      |
| IL_06847.1 | 6    | 109557 | 0   | 53388 | 0.0924  | Inf        | 11/4    | 102  | 0.24552      |
| IL_46435.1 | 6    | 109557 | 0   | 53388 | 0.0924  | Inf        | 13/2    | 103  | 0.24552      |
| IL_50521.1 | 52   | 109511 | 17  | 53371 | 0.0929  | 1.490737   | 14/7    | 104  | 0.24552      |
| IL_17603.1 | 334  | 109229 | 142 | 53246 | 0.0934  | 1.146578   | 11/5    | 105  | 0.24552      |
| IL_47444.3 | 728  | 108835 | 326 | 53062 | 0.1072  | 1.088749   | 12/6    | 106  | 0.27729      |
| IL_06211.3 | 132  | 109431 | 52  | 53336 | 0.1096  | 1.237199   | 7/2     | 107  | 0.27729      |
| IL_22909.1 | 100  | 109463 | 38  | 53350 | 0.1105  | 1.282529   | 9/3     | 108  | 0.27729      |
| IL_80505.1 | 9    | 109554 | 1   | 53387 | 0.1109  | 4.386285   | 11/2    | 109  | 0.27729      |
| IL_97296.1 | 199  | 109364 | 82  | 53306 | 0.1111  | 1.182864   | 7/3     | 110  | 0.27729      |
| IL_30381.1 | 65   | 109498 | 23  | 53365 | 0.1115  | 1.377346   | 8/4     | 111  | 0.27729      |
| IL_25271.2 | 23   | 109540 | 6   | 53382 | 0.1151  | 1.868087   | 14/7    | 112  | 0.28361      |
| IL_41139.1 | 55   | 109508 | 19  | 53369 | 0.1186  | 1.410767   | 7/2     | 113  | 0.28969      |
| IL_24546.4 | 133  | 109430 | 53  | 53335 | 0.1217  | 1.223044   | 10/3    | 114  | 0.29467      |
| IL_08926.3 | 103  | 109460 | 40  | 53348 | 0.1281  | 1.254952   | 5/3     | 115  | 0.30742      |
| IL_65553.8 | 98   | 109465 | 38  | 53350 | 0.1335  | 1.256864   | 12/7    | 116  | 0.31763      |
| IL_28572.2 | 5    | 109558 | 0   | 53388 | 0.1374  | Inf        | 15/5    | 117  | 0.32140      |
| IL_77014.1 | 5    | 109558 | 0   | 53388 | 0.1374  | Inf        | 11/5    | 118  | 0.32140      |
| IL_13069.3 | 77   | 109486 | 29  | 53359 | 0.1390  | 1.29397    | 4/2     | 119  | 0.32233      |
| IL_00998.1 | 94   | 109469 | 37  | 53351 | 0.1563  | 1.23813    | 8/4     | 120  | 0.35867      |
| IL_87548.1 | 395  | 109168 | 175 | 53213 | 0.1572  | 1.100221   | 11/6    | 121  | 0.35867      |
| IL_64589.1 | 57   | 109506 | 21  | 53367 | 0.1640  | 1.32283    | 7/2     | 122  | 0.37104      |
| IL_93424.4 | 587  | 108976 | 266 | 53122 | 0.1715  | 1.07572    | 9/4     | 123  | 0.38482      |
| IL_47758.2 | 115  | 109448 | 47  | 53341 | 0.1755  | 1.192467   | 8/4     | 124  | 0.39059      |
| IL_41153.1 | 28   | 109535 | 9   | 53379 | 0.1800  | 1.516114   | 7/3     | 125  | 0.39748      |
| IL_79955.2 | 340  | 109223 | 151 | 53237 | 0.1838  | 1.097489   | 12/6    | 126  | 0.40258      |
| IL_09491.1 | 30   | 109533 | 10  | 53378 | 0.1914  | 1.461967   | 7/2     | 127  | 0.41585      |
| IL_53635.3 | 96   | 109467 | 39  | 53349 | 0.1935  | 1.199616   | 11/5    | 128  | 0.41722      |
| IL_87507.1 | 203  | 109360 | 88  | 53300 | 0.1968  | 1.124293   | 9/4     | 129  | 0.42099      |
| IL_43124.2 | 168  | 109395 | 72  | 53316 | 0.2000  | 1.137192   | 7/4     | 130  | 0.42203      |
| IL_57785.5 | 46   | 109517 | 17  | 53371 | 0.2009  | 1.318702   | 8/4     | 131  | 0.42203      |
| IL_11751.1 | 32   | 109531 | 11  | 53377 | 0.2018  | 1.417674   | 7/2     | 132  | 0.42203      |
| IL_22732.1 | 172  | 109391 | 74  | 53314 | 0.2043  | 1.132801   | 9/5     | 133  | 0.42392      |
| IL_31555.5 | 594  | 108969 | 272 | 53116 | 0.2079  | 1.064485   | 9/4     | 134  | 0.42817      |
| IL_75328.1 | 22   | 109541 | 7   | 53381 | 0.2170  | 1.531558   | 14/4    | 135  | 0.44372      |
| IL_99397.1 | 17   | 109546 | 5   | 53383 | 0.2225  | 1.656853   | 9/4     | 136  | 0.45145      |
| IL_77263.2 | 265  | 109298 | 118 | 53270 | 0.2241  | 1.094544   | 10/5    | 137  | 0.45145      |
| IL_46306.1 | 1116 | 108447 | 522 | 52866 | 0.2272  | 1.042199   | 9/3     | 138  | 0.45448      |
| IL_88865.1 | 26   | 109537 | 9   | 53379 | 0.2429  | 1.407809   | 8/3     | 139  | 0.48229      |
| IL_85647.3 | 14   | 109549 | 4   | 53384 | 0.2469  | 1.705569   | 15/8    | 140  | 0.48589      |
| IL_71685.1 | 73   | 109490 | 30  | 53358 | 0.2499  | 1.185824   | 14/7    | 141  | 0.48589      |
| IL_06306.1 | 35   | 109528 | 13  | 53375 | 0.2500  | 1.312056   | 13/2    | 142  | 0.48589      |
| IL_93568.2 | 187  | 109376 | 83  | 53305 | 0.2613  | 1.098014   | 12/5    | 143  | 0.50437      |
| IL_09333.1 | 303  | 109260 | 138 | 53250 | 0.2728  | 1.070093   | 12/6    | 144  | 0.52157      |
| IL_39526.4 | 6    | 109557 | 1   | 53387 | 0.2740  | 2.923774   | 9/2     | 145  | 0.52157      |
| IL_70299.1 | 80   | 109483 | 34  | 53354 | 0.2875  | 1.146642   | 10/4    | 146  | 0.54341      |
| IL_07300.2 | 123  | 109440 | 54  | 53334 | 0.2902  | 1.110037   | 9/4     | 147  | 0.54485      |
| IL_58454.1 | 576  | 108987 | 269 | 53119 | 0.2956  | 1.043626   | 9/3     | 148  | 0.54832      |
| IL_83920.1 | 60   | 109503 | 25  | 53363 | 0.2970  | 1.169554   | 7/3     | 149  | 0.54832      |
| IL_43946.1 | 13   | 109550 | 4   | 53384 | 0.2985  | 1.583729   | 12/6    | 150  | 0.54832      |
| IL_38807.3 | 62   | 109501 | 26  | 53362 | 0.3016  | 1.162058   | 11/6    | 151  | 0.54832      |
| IL_23639.1 | 1117 | 108446 | 529 | 52859 | 0.3036  | 1.029237   | 9/4     | 152  | 0.54832      |

Continued on next page

Table D – continued from previous page

| ModelID    | A    | B      | C    | D     | P-value | Odds ratio | Nuc./Bp | Rank | Adj. p-value |
|------------|------|--------|------|-------|---------|------------|---------|------|--------------|
| IL_25082.1 | 3    | 109560 | 0    | 53388 | 0.3040  | Inf        | 17/6    | 153  | 0.54832      |
| IL_09530.1 | 643  | 108920 | 302  | 53086 | 0.3116  | 1.037694   | 8/3     | 154  | 0.55842      |
| IL_11778.1 | 33   | 109530 | 13   | 53375 | 0.3160  | 1.236985   | 7/2     | 155  | 0.56265      |
| IL_21254.1 | 35   | 109528 | 14   | 53374 | 0.3233  | 1.218247   | 12/7    | 156  | 0.57194      |
| IL_25380.1 | 157  | 109406 | 71   | 53317 | 0.3281  | 1.077619   | 8/4     | 157  | 0.57673      |
| IL_78744.1 | 19   | 109544 | 7    | 53381 | 0.3431  | 1.322718   | 12/6    | 158  | 0.59932      |
| IL_11302.1 | 812  | 108751 | 386  | 53002 | 0.3565  | 1.025267   | 10/3    | 159  | 0.61880      |
| IL_98591.3 | 5    | 109558 | 1    | 53387 | 0.3625  | 2.43646    | 13/8    | 160  | 0.62535      |
| IL_30067.1 | 268  | 109295 | 125  | 53263 | 0.3650  | 1.04484    | 10/5    | 161  | 0.62563      |
| IL_37347.1 | 14   | 109549 | 5    | 53383 | 0.3717  | 1.364462   | 15/7    | 162  | 0.63329      |
| IL_52173.1 | 171  | 109392 | 79   | 53309 | 0.3754  | 1.054833   | 9/2     | 163  | 0.63557      |
| IL_31224.1 | 273  | 109290 | 128  | 53260 | 0.3816  | 1.039364   | 7/2     | 164  | 0.64221      |
| IL_45262.4 | 141  | 109422 | 65   | 53323 | 0.3867  | 1.057098   | 9/3     | 165  | 0.64495      |
| IL_06468.1 | 235  | 109328 | 110  | 53278 | 0.3879  | 1.041089   | 10/4    | 166  | 0.64495      |
| IL_91379.1 | 7    | 109556 | 2    | 53386 | 0.3913  | 1.705524   | 12/2    | 167  | 0.64671      |
| IL_57977.1 | 67   | 109496 | 30   | 53358 | 0.3954  | 1.088313   | 11/4    | 168  | 0.64959      |
| IL_06421.1 | 96   | 109467 | 44   | 53344 | 0.4065  | 1.063213   | 7/4     | 169  | 0.66383      |
| IL_71942.1 | 9    | 109554 | 3    | 53385 | 0.4095  | 1.461879   | 10/2    | 170  | 0.66487      |
| IL_40892.1 | 95   | 109468 | 44   | 53344 | 0.4294  | 1.052129   | 8/3     | 171  | 0.69300      |
| IL_52509.1 | 492  | 109071 | 236  | 53152 | 0.4383  | 1.015938   | 10/4    | 172  | 0.70340      |
| IL_47732.1 | 17   | 109546 | 7    | 53381 | 0.4473  | 1.183409   | 6/2     | 173  | 0.70554      |
| IL_82601.1 | 2    | 109561 | 0    | 53388 | 0.4521  | Inf        | 8/4     | 174  | 0.70554      |
| IL_94403.5 | 2    | 109561 | 0    | 53388 | 0.4521  | Inf        | 11/3    | 175  | 0.70554      |
| IL_94744.1 | 2    | 109561 | 0    | 53388 | 0.4521  | Inf        | 17/8    | 176  | 0.70554      |
| IL_59529.1 | 470  | 109093 | 226  | 53162 | 0.4525  | 1.013436   | 10/5    | 177  | 0.70554      |
| IL_02835.1 | 4    | 109559 | 1    | 53387 | 0.4722  | 1.949152   | 13/4    | 178  | 0.73219      |
| IL_28003.1 | 60   | 109503 | 28   | 53360 | 0.4752  | 1.044197   | 8/4     | 179  | 0.73270      |
| IL_54966.1 | 272  | 109291 | 131  | 53257 | 0.4797  | 1.011794   | 9/5     | 180  | 0.73543      |
| IL_35043.1 | 6    | 109557 | 2    | 53386 | 0.4823  | 1.461866   | 10/3    | 181  | 0.73543      |
| IL_70401.1 | 10   | 109553 | 4    | 53384 | 0.4939  | 1.218198   | 11/3    | 182  | 0.74899      |
| IL_09882.1 | 94   | 109469 | 45   | 53343 | 0.5012  | 1.017903   | 12/6    | 183  | 0.75184      |
| IL_97191.1 | 14   | 109549 | 6    | 53382 | 0.5012  | 1.136999   | 13/7    | 184  | 0.75184      |
| IL_06180.1 | 875  | 108688 | 426  | 52962 | 0.5073  | 1.000878   | 9/4     | 185  | 0.75678      |
| IL_97057.3 | 659  | 108904 | 321  | 53067 | 0.5130  | 1.000371   | 11/5    | 186  | 0.76121      |
| IL_87523.1 | 130  | 109433 | 63   | 53325 | 0.5198  | 1.005509   | 10/3    | 187  | 0.76725      |
| IL_21077.1 | 154  | 109409 | 75   | 53313 | 0.5297  | 1.000552   | 8/2     | 188  | 0.77700      |
| IL_83250.1 | 109  | 109454 | 53   | 53335 | 0.5321  | 1.002147   | 11/5    | 189  | 0.77700      |
| IL_86336.1 | 272  | 109291 | 133  | 53255 | 0.5366  | 0.9965366  | 9/2     | 190  | 0.77941      |
| IL_46301.1 | 249  | 109314 | 122  | 53266 | 0.5443  | 0.9945207  | 9/3     | 191  | 0.78653      |
| IL_97833.1 | 27   | 109536 | 13   | 53375 | 0.5604  | 1.012054   | 14/8    | 192  | 0.80081      |
| IL_95652.3 | 31   | 109532 | 15   | 53373 | 0.5606  | 1.007052   | 14/7    | 193  | 0.80081      |
| IL_80652.1 | 15   | 109548 | 7    | 53381 | 0.5629  | 1.044179   | 13/6    | 194  | 0.80081      |
| IL_52958.1 | 2521 | 107042 | 1237 | 52151 | 0.5878  | 0.9929122  | 9/2     | 195  | 0.83196      |
| IL_03110.1 | 349  | 109214 | 173  | 53215 | 0.5934  | 0.9829487  | 13/5    | 196  | 0.83550      |
| IL_82563.1 | 44   | 109519 | 22   | 53366 | 0.5963  | 0.9745314  | 10/3    | 197  | 0.83550      |
| IL_54954.1 | 3    | 109560 | 1    | 53387 | 0.6027  | 1.461853   | 16/7    | 198  | 0.84017      |
| IL_91044.1 | 309  | 109254 | 154  | 53234 | 0.6116  | 0.9776475  | 8/3     | 199  | 0.84822      |
| IL_46034.3 | 79   | 109484 | 40   | 53348 | 0.6200  | 0.9623696  | 8/3     | 200  | 0.85558      |
| IL_91078.1 | 12   | 109551 | 6    | 53382 | 0.6286  | 0.9745388  | 12/4    | 201  | 0.86310      |
| IL_45794.1 | 39   | 109524 | 20   | 53368 | 0.6325  | 0.9501816  | 11/5    | 202  | 0.86418      |
| IL_54470.1 | 325  | 109238 | 163  | 53225 | 0.6383  | 0.9714624  | 8/4     | 203  | 0.86789      |
| IL_33842.1 | 23   | 109540 | 12   | 53376 | 0.6514  | 0.9339436  | 7/4     | 204  | 0.87410      |
| IL_87394.1 | 23   | 109540 | 12   | 53376 | 0.6514  | 0.9339436  | 10/2    | 205  | 0.87410      |
| IL_26868.1 | 382  | 109181 | 192  | 53196 | 0.6553  | 0.96935    | 10/5    | 206  | 0.87410      |
| IL_78513.1 | 21   | 109542 | 11   | 53377 | 0.6556  | 0.9302528  | 8/2     | 207  | 0.87410      |
| IL_12507.1 | 77   | 109486 | 40   | 53348 | 0.6686  | 0.9379743  | 11/4    | 208  | 0.87950      |
| IL_05513.1 | 1    | 109562 | 0    | 53388 | 0.6724  | Inf        | 12/3    | 209  | 0.87950      |
| IL_27668.1 | 1    | 109562 | 0    | 53388 | 0.6724  | Inf        | 11/3    | 210  | 0.87950      |
| IL_42891.1 | 1    | 109562 | 0    | 53388 | 0.6724  | Inf        | 14/3    | 211  | 0.87950      |

Continued on next page

Table D – continued from previous page

| ModelID    | A    | B      | C    | D     | P-value | Odds ratio | Nuc./Bp | Rank | Adj. p-value |
|------------|------|--------|------|-------|---------|------------|---------|------|--------------|
| IL_49493.4 | 102  | 109461 | 53   | 53335 | 0.6818  | 0.9377301  | 13/7    | 212  | 0.88138      |
| IL_37053.1 | 231  | 109332 | 118  | 53270 | 0.6842  | 0.9538184  | 12/6    | 213  | 0.88138      |
| IL_82188.2 | 215  | 109348 | 110  | 53278 | 0.6846  | 0.9523206  | 14/3    | 214  | 0.88138      |
| IL_65137.1 | 88   | 109475 | 46   | 53342 | 0.6866  | 0.9321375  | 12/6    | 215  | 0.88138      |
| IL_75415.1 | 4    | 109559 | 2    | 53386 | 0.6916  | 0.9745407  | 10/2    | 216  | 0.88371      |
| IL_49527.1 | 720  | 108843 | 362  | 53026 | 0.6994  | 0.9690047  | 10/4    | 217  | 0.88957      |
| IL_48918.3 | 69   | 109494 | 37   | 53351 | 0.7195  | 0.9086598  | 12/6    | 218  | 0.90711      |
| IL_03282.1 | 104  | 109459 | 55   | 53333 | 0.7198  | 0.9213324  | 10/5    | 219  | 0.90711      |
| IL_89794.1 | 25   | 109538 | 14   | 53374 | 0.7257  | 0.8701239  | 11/7    | 220  | 0.91042      |
| IL_24293.1 | 66   | 109497 | 36   | 53352 | 0.7444  | 0.89329    | 8/3     | 221  | 0.92616      |
| IL_27640.1 | 2    | 109561 | 1    | 53387 | 0.7483  | 0.9745412  | 15/4    | 222  | 0.92616      |
| IL_86981.1 | 2    | 109561 | 1    | 53387 | 0.7483  | 0.9745412  | 15/8    | 223  | 0.92616      |
| IL_82650.1 | 10   | 109553 | 6    | 53382 | 0.7535  | 0.8121377  | 13/5    | 224  | 0.92844      |
| IL_53988.1 | 92   | 109471 | 50   | 53338 | 0.7631  | 0.8965155  | 12/5    | 225  | 0.93601      |
| IL_16415.2 | 13   | 109550 | 8    | 53380 | 0.7775  | 0.7918313  | 14/7    | 226  | 0.94957      |
| IL_59934.1 | 83   | 109480 | 46   | 53342 | 0.7878  | 0.8791404  | 12/5    | 227  | 0.95405      |
| IL_72158.3 | 119  | 109444 | 65   | 53323 | 0.7946  | 0.8919876  | 12/6    | 228  | 0.95405      |
| IL_66744.1 | 73   | 109490 | 41   | 53347 | 0.7973  | 0.8675189  | 13/3    | 229  | 0.95405      |
| IL_31754.1 | 6    | 109557 | 4    | 53384 | 0.7984  | 0.7308838  | 13/7    | 230  | 0.95405      |
| IL_76486.1 | 3    | 109560 | 2    | 53386 | 0.7985  | 0.7308912  | 15/8    | 231  | 0.95405      |
| IL_31707.1 | 9    | 109554 | 6    | 53382 | 0.8105  | 0.7308765  | 11/4    | 232  | 0.96419      |
| IL_44067.4 | 12   | 109551 | 8    | 53380 | 0.8243  | 0.7308691  | 14/6    | 233  | 0.97245      |
| IL_92321.4 | 445  | 109118 | 233  | 53155 | 0.8245  | 0.9303635  | 12/6    | 234  | 0.97245      |
| IL_96446.1 | 109  | 109454 | 61   | 53327 | 0.8289  | 0.8705953  | 10/3    | 235  | 0.97348      |
| IL_85805.1 | 890  | 108673 | 458  | 52930 | 0.8370  | 0.9464665  | 8/2     | 236  | 0.97643      |
| IL_92114.3 | 67   | 109496 | 39   | 53349 | 0.8385  | 0.8370388  | 9/4     | 237  | 0.97643      |
| IL_25307.1 | 59   | 109504 | 35   | 53353 | 0.8492  | 0.8213382  | 9/3     | 238  | 0.98320      |
| IL_81398.1 | 3058 | 106505 | 1538 | 51850 | 0.8514  | 0.9679943  | 10/4    | 239  | 0.98320      |
| IL_60649.1 | 42   | 109521 | 27   | 53361 | 0.8941  | 0.7579321  | 11/5    | 240  | 1.00000      |
| IL_62499.7 | 446  | 109117 | 242  | 53146 | 0.9173  | 0.8976353  | 7/4     | 241  | 1.00000      |
| IL_46990.1 | 1687 | 107876 | 870  | 52518 | 0.9175  | 0.9440167  | 10/2    | 242  | 1.00000      |
| IL_98924.1 | 391  | 109172 | 215  | 53173 | 0.9285  | 0.8857705  | 9/3     | 243  | 1.00000      |
| IL_52940.1 | 226  | 109337 | 129  | 53259 | 0.9314  | 0.8533953  | 14/6    | 244  | 1.00000      |
| IL_47687.1 | 230  | 109333 | 133  | 53255 | 0.9475  | 0.8423491  | 13/6    | 245  | 1.00000      |
| IL_90735.1 | 18   | 109545 | 15   | 53373 | 0.9561  | 0.5846575  | 16/3    | 246  | 1.00000      |
| IL_05221.1 | 2    | 109561 | 3    | 53385 | 0.9575  | 0.3248442  | 15/11   | 247  | 1.00000      |
| IL_94973.1 | 12   | 109551 | 11   | 53377 | 0.9577  | 0.5315074  | 14/6    | 248  | 1.00000      |
| IL_27243.1 | 1    | 109562 | 2    | 53386 | 0.9648  | 0.2436375  | 14/7    | 249  | 1.00000      |
| IL_25181.1 | 1001 | 108562 | 540  | 52848 | 0.9735  | 0.9023875  | 13/5    | 250  | 1.00000      |
| IL_30840.2 | 2233 | 107330 | 1171 | 52217 | 0.9807  | 0.9277342  | 11/5    | 251  | 1.00000      |
| IL_53323.1 | 969  | 108594 | 528  | 52860 | 0.9819  | 0.8933337  | 10/3    | 252  | 1.00000      |
| IL_68827.1 | 24   | 109539 | 23   | 53365 | 0.9929  | 0.5083444  | 11/4    | 253  | 1.00000      |
| IL_49976.1 | 1024 | 108539 | 589  | 52799 | 0.9994  | 0.8457285  | 8/5     | 254  | 1.00000      |
| IL_02359.3 | 0    | 109563 | 0    | 53388 | 1.0000  | 0          | 16/9    | 255  | 1.00000      |
| IL_16330.1 | 0    | 109563 | 0    | 53388 | 1.0000  | 0          | 25/5    | 256  | 1.00000      |
| IL_17682.1 | 0    | 109563 | 1    | 53387 | 1.0000  | 0          | 17/8    | 257  | 1.00000      |
| IL_21421.1 | 0    | 109563 | 0    | 53388 | 1.0000  | 0          | 20/7    | 258  | 1.00000      |
| IL_21495.1 | 0    | 109563 | 0    | 53388 | 1.0000  | 0          | 14/5    | 259  | 1.00000      |
| IL_23414.1 | 0    | 109563 | 0    | 53388 | 1.0000  | 0          | 21/5    | 260  | 1.00000      |
| IL_25230.3 | 0    | 109563 | 0    | 53388 | 1.0000  | 0          | 18/8    | 261  | 1.00000      |
| IL_33964.1 | 0    | 109563 | 0    | 53388 | 1.0000  | 0          | 20/6    | 262  | 1.00000      |
| IL_39324.1 | 0    | 109563 | 0    | 53388 | 1.0000  | 0          | 18/10   | 263  | 1.00000      |
| IL_40527.1 | 0    | 109563 | 0    | 53388 | 1.0000  | 0          | 15/5    | 264  | 1.00000      |
| IL_52610.1 | 0    | 109563 | 0    | 53388 | 1.0000  | 0          | 36/9    | 265  | 1.00000      |
| IL_57285.1 | 0    | 109563 | 0    | 53388 | 1.0000  | 0          | 13/4    | 266  | 1.00000      |
| IL_76095.3 | 0    | 109563 | 0    | 53388 | 1.0000  | 0          | 18/8    | 267  | 1.00000      |
| IL_76263.1 | 0    | 109563 | 0    | 53388 | 1.0000  | 0          | 17/3    | 268  | 1.00000      |
| IL_77076.1 | 0    | 109563 | 0    | 53388 | 1.0000  | 0          | 18/8    | 269  | 1.00000      |
| IL_77296.1 | 0    | 109563 | 0    | 53388 | 1.0000  | 0          | 14/2    | 270  | 1.00000      |

Continued on next page



Table D – continued from previous page

| ModellID   | A | B      | C | D     | P-value | Odds ratio | Nuc./Bp | Rank | Adj. p-value |
|------------|---|--------|---|-------|---------|------------|---------|------|--------------|
| IL_88367.1 | 0 | 109563 | 0 | 53388 | 1.0000  | 0          | 15/7    | 271  | 1.00000      |
| IL_89028.6 | 0 | 109563 | 0 | 53388 | 1.0000  | 0          | 13/5    | 272  | 1.00000      |
| IL_90057.1 | 0 | 109563 | 0 | 53388 | 1.0000  | 0          | 23/17   | 273  | 1.00000      |
| IL_91904.1 | 0 | 109563 | 0 | 53388 | 1.0000  | 0          | 13/4    | 274  | 1.00000      |
| IL_97842.1 | 0 | 109563 | 0 | 53388 | 1.0000  | 0          | 16/5    | 275  | 1.00000      |
| IL_98655.1 | 0 | 109563 | 0 | 53388 | 1.0000  | 0          | 13/5    | 276  | 1.00000      |

Table E: Results of Fisher’s exact test according to FET scheme (see Supplementary Material S6) for JAR3D IL module predictions on SISSIZ and original data of order R. Red highlighted rows have a significant p-value after multiple testing correction using the Benjamini-Hochberg procedure at a 5% false discovery rate (adjusted p-value  $\leq 0.05$ ) and average 3D sequence length  $\geq 9$ . “Nuc./Bp” denotes the total strand length and the number of base pairs.

| ModellID    | A    | B      | C   | D     | P-value      | Odds ratio | Nuc./Bp | Rank | Adj. p-value         |
|-------------|------|--------|-----|-------|--------------|------------|---------|------|----------------------|
| IL_47875.1  | 546  | 110251 | 149 | 53239 | 6.283474e-11 | 1.769507   | 4/2     | 1    | 1.734238824e-08      |
| IL_96206.3  | 295  | 110502 | 63  | 53325 | 1.524187e-10 | 2.259645   | 5/4     | 2    | 2.10337806e-08       |
| IL_73000.2  | 254  | 110543 | 54  | 53334 | 2.369698e-09 | 2.269399   | 6/4     | 3    | 1.76879223e-07       |
| IL_92109.3  | 524  | 110273 | 150 | 53238 | 2.563467e-09 | 1.686519   | 4/2     | 4    | 1.76879223e-07       |
| IL_28947.2  | 329  | 110468 | 83  | 53305 | 1.563343e-08 | 1.912703   | 4/2     | 5    | 8.62965336e-07       |
| IL_97217.11 | 345  | 110452 | 92  | 53296 | 7.166728e-08 | 1.809467   | 4/2     | 6    | 3.29669488e-06       |
| IL_58586.2  | 296  | 110501 | 77  | 53311 | 2.405906e-07 | 1.854599   | 6/2     | 7    | 9.48614365714286e-06 |
| IL_56465.4  | 479  | 110318 | 146 | 53242 | 3.019554e-07 | 1.583396   | 5/2     | 8    | 1.04174613e-05       |
| IL_94430.5  | 353  | 110444 | 102 | 53286 | 1.310732e-06 | 1.669722   | 5/3     | 9    | 4.01957813333333e-05 |
| IL_39199.4  | 269  | 110528 | 72  | 53316 | 2.073315e-06 | 1.802202   | 5/4     | 10   | 5.7223494e-05        |
| IL_28644.1  | 156  | 110641 | 33  | 53355 | 2.423588e-06 | 2.279647   | 5/2     | 11   | 6.08100261818182e-05 |
| IL_23448.1  | 89   | 110708 | 13  | 53375 | 3.739168e-06 | 3.300605   | 6/2     | 12   | 8.6000864e-05        |
| IL_25300.3  | 289  | 110508 | 81  | 53307 | 4.178941e-06 | 1.721084   | 4/2     | 13   | 8.8722132e-05        |
| IL_58291.4  | 125  | 110672 | 25  | 53363 | 9.152472e-06 | 2.410851   | 6/2     | 14   | 0.00018              |
| IL_73276.5  | 180  | 110617 | 44  | 53344 | 1.249924e-05 | 1.972794   | 7/5     | 15   | 0.00022              |
| IL_67887.1  | 211  | 110586 | 55  | 53333 | 1.256306e-05 | 1.85018    | 5/3     | 16   | 0.00022              |
| IL_87904.5  | 1161 | 109636 | 444 | 52944 | 1.337971e-05 | 1.262695   | 10/5    | 17   | 0.00022              |
| IL_70173.1  | 178  | 110619 | 44  | 53344 | 1.78963e-05  | 1.950839   | 6/2     | 18   | 0.00027              |
| IL_44540.4  | 207  | 110590 | 55  | 53333 | 2.436051e-05 | 1.81504    | 5/4     | 19   | 0.00034              |
| IL_23262.4  | 463  | 110334 | 154 | 53234 | 2.46736e-05  | 1.450571   | 10/3    | 20   | 0.00034              |
| IL_92027.3  | 154  | 110643 | 37  | 53351 | 3.658246e-05 | 2.006947   | 6/4     | 21   | 0.00048              |
| IL_69799.1  | 118  | 110679 | 25  | 53363 | 4.048887e-05 | 2.2757     | 5/2     | 22   | 0.00051              |
| IL_46648.6  | 222  | 110575 | 62  | 53326 | 4.643344e-05 | 1.7268     | 5/3     | 23   | 0.00056              |
| IL_79083.3  | 654  | 110143 | 236 | 53152 | 5.695096e-05 | 1.337336   | 11/4    | 24   | 0.00065              |
| IL_74876.2  | 876  | 109921 | 332 | 53056 | 8.219327e-05 | 1.273516   | 10/4    | 25   | 0.00091              |
| IL_24982.5  | 1362 | 109435 | 545 | 52843 | 0.0001       | 1.206711   | 10/5    | 26   | 0.00112              |
| IL_43316.1  | 840  | 109957 | 320 | 53068 | 0.0002       | 1.266848   | 10/4    | 27   | 0.00154              |
| IL_01080.1  | 208  | 110589 | 60  | 53328 | 0.0002       | 1.671684   | 7/2     | 28   | 0.00168              |
| IL_02809.3  | 231  | 110566 | 69  | 53319 | 0.0002       | 1.614441   | 8/4     | 29   | 0.00178              |
| IL_40845.1  | 172  | 110625 | 48  | 53340 | 0.0003       | 1.727768   | 7/4     | 30   | 0.00284              |
| IL_86357.3  | 79   | 110718 | 16  | 53372 | 0.0005       | 2.380128   | 6/3     | 31   | 0.00385              |
| IL_63133.1  | 53   | 110744 | 8   | 53380 | 0.0005       | 3.193292   | 6/3     | 32   | 0.00385              |
| IL_83856.1  | 547  | 110250 | 201 | 53187 | 0.0005       | 1.312904   | 12/6    | 33   | 0.00385              |
| IL_21333.2  | 243  | 110554 | 77  | 53311 | 0.0006       | 1.521797   | 8/4     | 34   | 0.00472              |
| IL_63952.1  | 517  | 110280 | 191 | 53197 | 0.0008       | 1.30576    | 13/4    | 35   | 0.00625              |
| IL_90459.3  | 478  | 110319 | 176 | 53212 | 0.0011       | 1.310056   | 6/3     | 36   | 0.00823              |
| IL_80494.2  | 491  | 110306 | 182 | 53206 | 0.0012       | 1.301331   | 12/5    | 37   | 0.00884              |
| IL_80348.3  | 186  | 110611 | 57  | 53331 | 0.0012       | 1.573325   | 5/2     | 38   | 0.00901              |

Continued on next page

Table E – continued from previous page

| ModelID     | A    | B      | C    | D     | P-value | Odds ratio | Nuc./Bp | Rank | Adj. p-value |
|-------------|------|--------|------|-------|---------|------------|---------|------|--------------|
| IL_87065.1  | 136  | 110661 | 38   | 53350 | 0.0013  | 1.725416   | 5/3     | 39   | 0.00901      |
| IL_34628.2  | 52   | 110745 | 9    | 53379 | 0.0014  | 2.784867   | 12/6    | 40   | 0.00954      |
| IL_47174.11 | 277  | 110520 | 94   | 53294 | 0.0016  | 1.420992   | 6/3     | 41   | 0.01049      |
| IL_39585.1  | 1037 | 109760 | 425  | 52963 | 0.0024  | 1.177369   | 10/6    | 42   | 0.01568      |
| IL_26971.1  | 868  | 109929 | 351  | 53037 | 0.0027  | 1.193088   | 10/3    | 43   | 0.01747      |
| IL_39980.1  | 100  | 110697 | 27   | 53361 | 0.0035  | 1.785348   | 6/3     | 44   | 0.02194      |
| IL_12147.1  | 200  | 110597 | 66   | 53322 | 0.0038  | 1.460993   | 6/3     | 45   | 0.02267      |
| IL_88119.1  | 185  | 110612 | 60   | 53328 | 0.0038  | 1.486526   | 6/3     | 46   | 0.02267      |
| IL_09587.1  | 2726 | 108071 | 1199 | 52189 | 0.0039  | 1.097931   | 11/4    | 47   | 0.02291      |
| IL_42251.1  | 201  | 110596 | 67   | 53321 | 0.0045  | 1.44637    | 6/3     | 48   | 0.02575      |
| IL_98421.4  | 103  | 110694 | 29   | 53359 | 0.0051  | 1.71207    | 7/2     | 49   | 0.02869      |
| IL_17212.2  | 212  | 110585 | 72   | 53316 | 0.0052  | 1.419605   | 6/3     | 50   | 0.02869      |
| IL_68767.1  | 100  | 110697 | 28   | 53360 | 0.0054  | 1.721554   | 6/2     | 51   | 0.02930      |
| IL_43877.1  | 86   | 110711 | 23   | 53365 | 0.0059  | 1.802332   | 6/2     | 52   | 0.03089      |
| IL_69536.1  | 1122 | 109675 | 471  | 52917 | 0.0059  | 1.149359   | 8/3     | 53   | 0.03089      |
| IL_63253.1  | 91   | 110706 | 25   | 53363 | 0.0063  | 1.754563   | 6/2     | 54   | 0.03168      |
| IL_70237.3  | 936  | 109861 | 388  | 53000 | 0.0063  | 1.163782   | 10/4    | 55   | 0.03168      |
| IL_91089.1  | 39   | 110758 | 7    | 53381 | 0.0068  | 2.685193   | 8/2     | 56   | 0.03329      |
| IL_82444.1  | 175  | 110622 | 58   | 53330 | 0.0069  | 1.454585   | 6/3     | 57   | 0.03338      |
| IL_37406.1  | 82   | 110715 | 22   | 53366 | 0.0073  | 1.796585   | 7/2     | 58   | 0.03473      |
| IL_80093.1  | 653  | 110144 | 264  | 53124 | 0.0082  | 1.192978   | 10/5    | 59   | 0.03818      |
| IL_46721.1  | 97   | 110700 | 28   | 53360 | 0.0086  | 1.669862   | 10/3    | 60   | 0.03972      |
| IL_21639.1  | 44   | 110753 | 9    | 53379 | 0.0089  | 2.356259   | 9/3     | 61   | 0.04041      |
| IL_55649.1  | 397  | 110400 | 153  | 53235 | 0.0097  | 1.251166   | 8/3     | 62   | 0.04336      |
| IL_86059.1  | 108  | 110689 | 33   | 53355 | 0.0116  | 1.577536   | 4/2     | 63   | 0.04982      |
| IL_55938.4  | 297  | 110500 | 111  | 53277 | 0.0117  | 1.290013   | 7/4     | 64   | 0.04982      |
| IL_31006.1  | 185  | 110612 | 64   | 53324 | 0.0117  | 1.393536   | 11/5    | 65   | 0.04982      |
| IL_39355.1  | 350  | 110447 | 134  | 53254 | 0.0123  | 1.259356   | 8/3     | 66   | 0.05084      |
| IL_37197.1  | 655  | 110142 | 268  | 53120 | 0.0123  | 1.178707   | 11/4    | 67   | 0.05084      |
| IL_37104.3  | 193  | 110604 | 68   | 53320 | 0.0140  | 1.368286   | 6/3     | 68   | 0.05606      |
| IL_41791.1  | 70   | 110727 | 19   | 53369 | 0.0140  | 1.775736   | 11/8    | 69   | 0.05606      |
| IL_18675.1  | 91   | 110706 | 27   | 53361 | 0.0144  | 1.624535   | 7/2     | 70   | 0.05657      |
| IL_13777.1  | 119  | 110678 | 38   | 53350 | 0.0146  | 1.509508   | 5/2     | 71   | 0.05657      |
| IL_16166.4  | 136  | 110661 | 45   | 53343 | 0.0154  | 1.456828   | 5/2     | 72   | 0.05919      |
| IL_37325.1  | 50   | 110747 | 12   | 53376 | 0.0159  | 2.008173   | 7/4     | 73   | 0.06005      |
| IL_69106.1  | 193  | 110604 | 69   | 53319 | 0.0178  | 1.348438   | 7/3     | 74   | 0.06656      |
| IL_15840.2  | 706  | 110091 | 294  | 53094 | 0.0183  | 1.158102   | 11/6    | 75   | 0.06728      |
| IL_06808.1  | 84   | 110713 | 25   | 53363 | 0.0188  | 1.619495   | 8/4     | 76   | 0.06728      |
| IL_06471.1  | 488  | 110309 | 197  | 53191 | 0.0188  | 1.194466   | 10/7    | 77   | 0.06728      |
| IL_13959.4  | 160  | 110637 | 56   | 53332 | 0.0214  | 1.377297   | 8/4     | 78   | 0.07570      |
| IL_05723.1  | 485  | 110312 | 197  | 53191 | 0.0226  | 1.187093   | 10/5    | 79   | 0.07894      |
| IL_98566.1  | 82   | 110715 | 25   | 53363 | 0.0251  | 1.580907   | 8/2     | 80   | 0.08533      |
| IL_41766.6  | 345  | 110452 | 136  | 53252 | 0.0251  | 1.223019   | 8/4     | 81   | 0.08533      |
| IL_95150.6  | 69   | 110728 | 20   | 53368 | 0.0254  | 1.662805   | 7/3     | 82   | 0.08533      |
| IL_97509.1  | 733  | 110064 | 311  | 53077 | 0.0311  | 1.136584   | 10/5    | 83   | 0.10357      |
| IL_05684.1  | 231  | 110566 | 88   | 53300 | 0.0329  | 1.265381   | 8/3     | 84   | 0.10758      |
| IL_85510.1  | 683  | 110114 | 289  | 53099 | 0.0333  | 1.139629   | 6/2     | 85   | 0.10758      |
| IL_15205.1  | 117  | 110680 | 40   | 53348 | 0.0340  | 1.40987    | 12/5    | 86   | 0.10758      |
| IL_57364.1  | 26   | 110771 | 5    | 53383 | 0.0341  | 2.50598    | 8/4     | 87   | 0.10758      |
| IL_80714.1  | 469  | 110328 | 193  | 53195 | 0.0343  | 1.171643   | 12/3    | 88   | 0.10758      |
| IL_31039.1  | 59   | 110738 | 17   | 53371 | 0.0356  | 1.672671   | 7/3     | 89   | 0.11032      |
| IL_06177.1  | 40   | 110757 | 10   | 53378 | 0.0371  | 1.927744   | 6/2     | 90   | 0.11245      |
| IL_31066.3  | 40   | 110757 | 10   | 53378 | 0.0371  | 1.927744   | 5/2     | 91   | 0.11245      |
| IL_31663.1  | 94   | 110703 | 31   | 53357 | 0.0380  | 1.461495   | 7/4     | 92   | 0.11407      |
| IL_17603.1  | 352  | 110445 | 142  | 53246 | 0.0395  | 1.195056   | 11/5    | 93   | 0.11717      |
| IL_90133.3  | 146  | 110651 | 53   | 53335 | 0.0431  | 1.327846   | 7/3     | 94   | 0.12646      |
| IL_93424.4  | 626  | 110171 | 266  | 53122 | 0.0449  | 1.134741   | 9/4     | 95   | 0.13054      |
| IL_54450.1  | 41   | 110756 | 11   | 53377 | 0.0509  | 1.796291   | 8/3     | 96   | 0.14594      |
| IL_56513.1  | 94   | 110703 | 32   | 53356 | 0.0513  | 1.415811   | 5/2     | 97   | 0.14594      |

Continued on next page

Table E – continued from previous page

| ModelID    | A    | B      | C    | D     | P-value | Odds ratio | Nuc./Bp | Rank | Adj. p-value |
|------------|------|--------|------|-------|---------|------------|---------|------|--------------|
| IL_61730.1 | 24   | 110773 | 5    | 53383 | 0.0544  | 2.313174   | 11/3    | 98   | 0.15308      |
| IL_12211.1 | 129  | 110668 | 47   | 53341 | 0.0568  | 1.322956   | 12/6    | 99   | 0.15841      |
| IL_06847.1 | 7    | 110790 | 0    | 53388 | 0.0637  | Inf        | 11/4    | 100  | 0.17589      |
| IL_25271.2 | 26   | 110771 | 6    | 53382 | 0.0657  | 2.088281   | 14/7    | 101  | 0.17795      |
| IL_20775.1 | 65   | 110732 | 21   | 53367 | 0.0658  | 1.491738   | 7/3     | 102  | 0.17795      |
| IL_97296.1 | 208  | 110589 | 82   | 53306 | 0.0681  | 1.222656   | 7/3     | 103  | 0.18251      |
| IL_87548.1 | 414  | 110383 | 175  | 53213 | 0.0782  | 1.140446   | 11/6    | 104  | 0.20514      |
| IL_46306.1 | 1168 | 109629 | 522  | 52866 | 0.0786  | 1.079003   | 9/3     | 105  | 0.20514      |
| IL_23639.1 | 1183 | 109614 | 529  | 52859 | 0.0788  | 1.078403   | 9/4     | 106  | 0.20514      |
| IL_79955.2 | 360  | 110437 | 151  | 53237 | 0.0819  | 1.149267   | 12/6    | 107  | 0.20980      |
| IL_50911.1 | 33   | 110764 | 9    | 53379 | 0.0821  | 1.767021   | 7/3     | 108  | 0.20980      |
| IL_34363.2 | 19   | 110778 | 4    | 53384 | 0.0880  | 2.289018   | 13/9    | 109  | 0.22186      |
| IL_52958.1 | 2689 | 108108 | 1237 | 52151 | 0.0884  | 1.048638   | 9/2     | 110  | 0.22186      |
| IL_46435.1 | 6    | 110791 | 0    | 53388 | 0.0944  | Inf        | 13/2    | 111  | 0.23299      |
| IL_17066.1 | 67   | 110730 | 23   | 53365 | 0.0954  | 1.403923   | 6/3     | 112  | 0.23299      |
| IL_30381.1 | 67   | 110730 | 23   | 53365 | 0.0954  | 1.403923   | 8/4     | 113  | 0.23299      |
| IL_00998.1 | 100  | 110697 | 37   | 53351 | 0.0978  | 1.302631   | 8/4     | 114  | 0.23686      |
| IL_13069.3 | 81   | 110716 | 29   | 53359 | 0.0994  | 1.346159   | 4/2     | 115  | 0.23853      |
| IL_65553.8 | 102  | 110695 | 38   | 53350 | 0.1011  | 1.293618   | 12/7    | 116  | 0.24065      |
| IL_22909.1 | 101  | 110696 | 38   | 53350 | 0.1114  | 1.280928   | 9/3     | 117  | 0.25993      |
| IL_47444.3 | 735  | 110062 | 326  | 53062 | 0.1115  | 1.086963   | 12/6    | 118  | 0.25993      |
| IL_41139.1 | 56   | 110741 | 19   | 53369 | 0.1126  | 1.420424   | 7/2     | 119  | 0.25993      |
| IL_06211.3 | 133  | 110664 | 52   | 53336 | 0.1137  | 1.232685   | 7/2     | 120  | 0.25993      |
| IL_80505.1 | 9    | 110788 | 1    | 53387 | 0.1140  | 4.337415   | 11/2    | 121  | 0.25993      |
| IL_58454.1 | 610  | 110187 | 269  | 53119 | 0.1189  | 1.093191   | 9/3     | 122  | 0.26909      |
| IL_93568.2 | 202  | 110595 | 83   | 53305 | 0.1222  | 1.173007   | 12/5    | 123  | 0.27431      |
| IL_08926.3 | 104  | 110693 | 40   | 53348 | 0.1295  | 1.253023   | 5/3     | 124  | 0.28643      |
| IL_47758.2 | 120  | 110677 | 47   | 53341 | 0.1298  | 1.230487   | 8/4     | 125  | 0.28643      |
| IL_50521.1 | 50   | 110747 | 17   | 53371 | 0.1308  | 1.417418   | 14/7    | 126  | 0.28643      |
| IL_53635.3 | 101  | 110696 | 39   | 53349 | 0.1380  | 1.248071   | 11/5    | 127  | 0.29651      |
| IL_28572.2 | 5    | 110792 | 0    | 53388 | 0.1399  | Inf        | 15/5    | 128  | 0.29651      |
| IL_64589.1 | 59   | 110738 | 21   | 53367 | 0.1400  | 1.354004   | 7/2     | 129  | 0.29651      |
| IL_87507.1 | 211  | 110586 | 88   | 53300 | 0.1402  | 1.155641   | 9/4     | 130  | 0.29651      |
| IL_31555.5 | 612  | 110185 | 272  | 53116 | 0.1407  | 1.084637   | 9/4     | 131  | 0.29651      |
| IL_57785.5 | 49   | 110748 | 17   | 53371 | 0.1485  | 1.389068   | 8/4     | 132  | 0.31052      |
| IL_43124.2 | 174  | 110623 | 72   | 53316 | 0.1537  | 1.164727   | 7/4     | 133  | 0.31886      |
| IL_59529.1 | 509  | 110288 | 226  | 53162 | 0.1620  | 1.085629   | 10/5    | 134  | 0.33362      |
| IL_77263.2 | 274  | 110523 | 118  | 53270 | 0.1666  | 1.119171   | 10/5    | 135  | 0.34066      |
| IL_24546.4 | 130  | 110667 | 53   | 53335 | 0.1717  | 1.182104   | 10/3    | 136  | 0.34531      |
| IL_09333.1 | 317  | 110480 | 138  | 53250 | 0.1719  | 1.10717    | 12/6    | 137  | 0.34531      |
| IL_09491.1 | 31   | 110766 | 10   | 53378 | 0.1731  | 1.493883   | 7/2     | 138  | 0.34531      |
| IL_11302.1 | 850  | 109947 | 386  | 53002 | 0.1739  | 1.061549   | 10/3    | 139  | 0.34531      |
| IL_11751.1 | 33   | 110764 | 11   | 53377 | 0.1841  | 1.445695   | 7/2     | 140  | 0.36287      |
| IL_41153.1 | 28   | 110769 | 9    | 53379 | 0.1884  | 1.499225   | 7/3     | 141  | 0.36881      |
| IL_09530.1 | 667  | 110130 | 302  | 53086 | 0.1935  | 1.064615   | 8/3     | 142  | 0.37618      |
| IL_22732.1 | 174  | 110623 | 74   | 53314 | 0.2031  | 1.13321    | 9/5     | 143  | 0.39191      |
| IL_77014.1 | 4    | 110793 | 0    | 53388 | 0.2074  | Inf        | 11/5    | 144  | 0.39617      |
| IL_25380.1 | 167  | 110630 | 71   | 53317 | 0.2081  | 1.133569   | 8/4     | 145  | 0.39617      |
| IL_06180.1 | 927  | 109870 | 426  | 52962 | 0.2169  | 1.048951   | 9/4     | 146  | 0.40998      |
| IL_71685.1 | 75   | 110722 | 30   | 53358 | 0.2255  | 1.204753   | 14/7    | 147  | 0.42339      |
| IL_97057.3 | 700  | 110097 | 321  | 53067 | 0.2415  | 1.051094   | 11/5    | 148  | 0.45030      |
| IL_70299.1 | 83   | 110714 | 34   | 53354 | 0.2439  | 1.176409   | 10/4    | 149  | 0.45185      |
| IL_91379.1 | 9    | 110788 | 2    | 53386 | 0.2520  | 2.168429   | 12/2    | 150  | 0.46377      |
| IL_85647.3 | 14   | 110783 | 4    | 53384 | 0.2539  | 1.686571   | 15/8    | 151  | 0.46412      |
| IL_06306.1 | 35   | 110762 | 13   | 53375 | 0.2616  | 1.297342   | 13/2    | 152  | 0.47372      |
| IL_75328.1 | 21   | 110776 | 7    | 53381 | 0.2637  | 1.445647   | 14/4    | 153  | 0.47372      |
| IL_06421.1 | 104  | 110693 | 44   | 53344 | 0.2643  | 1.139051   | 7/4     | 154  | 0.47372      |
| IL_21254.1 | 37   | 110760 | 14   | 53374 | 0.2705  | 1.273521   | 12/7    | 155  | 0.48158      |
| IL_99397.1 | 16   | 110781 | 5    | 53383 | 0.2744  | 1.542008   | 9/4     | 156  | 0.48414      |

Continued on next page

Table E – continued from previous page

| ModelID    | A    | B      | C    | D     | P-value | Odds ratio | Nuc./Bp | Rank | Adj. p-value |
|------------|------|--------|------|-------|---------|------------|---------|------|--------------|
| IL_06468.1 | 246  | 110551 | 110  | 53278 | 0.2771  | 1.077772   | 10/4    | 157  | 0.48414      |
| IL_39526.4 | 6    | 110791 | 1    | 53387 | 0.2787  | 2.89121    | 9/2     | 158  | 0.48414      |
| IL_30067.1 | 278  | 110519 | 125  | 53263 | 0.2789  | 1.071822   | 10/5    | 159  | 0.48414      |
| IL_91044.1 | 339  | 110458 | 154  | 53234 | 0.2893  | 1.06089    | 8/3     | 160  | 0.49691      |
| IL_88865.1 | 25   | 110772 | 9    | 53379 | 0.2899  | 1.3386     | 8/3     | 161  | 0.49691      |
| IL_11778.1 | 34   | 110763 | 13   | 53375 | 0.2940  | 1.260276   | 7/2     | 162  | 0.50089      |
| IL_43946.1 | 13   | 110784 | 4    | 53384 | 0.3060  | 1.566088   | 12/6    | 163  | 0.51539      |
| IL_78744.1 | 20   | 110777 | 7    | 53381 | 0.3062  | 1.376821   | 12/6    | 164  | 0.51539      |
| IL_45262.4 | 147  | 110650 | 65   | 53323 | 0.3094  | 1.089848   | 9/3     | 165  | 0.51754      |
| IL_83920.1 | 60   | 110737 | 25   | 53363 | 0.3139  | 1.156524   | 7/3     | 166  | 0.51976      |
| IL_07300.2 | 123  | 110674 | 54   | 53334 | 0.3145  | 1.097662   | 9/4     | 167  | 0.51976      |
| IL_38807.3 | 61   | 110736 | 26   | 53362 | 0.3452  | 1.130569   | 11/6    | 168  | 0.56719      |
| IL_09882.1 | 101  | 110696 | 45   | 53343 | 0.3670  | 1.081567   | 12/6    | 169  | 0.59662      |
| IL_98591.3 | 5    | 110792 | 1    | 53387 | 0.3675  | 2.409323   | 13/8    | 170  | 0.59662      |
| IL_37347.1 | 14   | 110783 | 5    | 53383 | 0.3804  | 1.349272   | 15/7    | 171  | 0.60938      |
| IL_31224.1 | 276  | 110521 | 128  | 53260 | 0.3823  | 1.03908    | 7/2     | 172  | 0.60938      |
| IL_52509.1 | 503  | 110294 | 236  | 53152 | 0.3840  | 1.027151   | 10/4    | 173  | 0.60938      |
| IL_81398.1 | 3222 | 107575 | 1538 | 51850 | 0.3856  | 1.009733   | 10/4    | 174  | 0.60938      |
| IL_54966.1 | 282  | 110515 | 131  | 53257 | 0.3865  | 1.03735    | 9/5     | 175  | 0.60938      |
| IL_57977.1 | 68   | 110729 | 30   | 53358 | 0.3886  | 1.092257   | 11/4    | 176  | 0.60938      |
| IL_47732.1 | 18   | 110779 | 7    | 53381 | 0.4036  | 1.239062   | 6/2     | 177  | 0.62935      |
| IL_52173.1 | 171  | 110626 | 79   | 53309 | 0.4072  | 1.043062   | 9/2     | 178  | 0.63143      |
| IL_28003.1 | 62   | 110735 | 28   | 53360 | 0.4367  | 1.066999   | 8/4     | 179  | 0.67339      |
| IL_46301.1 | 259  | 110538 | 122  | 53266 | 0.4420  | 1.023024   | 9/3     | 180  | 0.67773      |
| IL_25082.1 | 2    | 110795 | 0    | 53388 | 0.4554  | Inf        | 17/6    | 181  | 0.68309      |
| IL_82601.1 | 2    | 110795 | 0    | 53388 | 0.4554  | Inf        | 8/4     | 182  | 0.68309      |
| IL_94403.5 | 2    | 110795 | 0    | 53388 | 0.4554  | Inf        | 11/3    | 183  | 0.68309      |
| IL_94744.1 | 2    | 110795 | 0    | 53388 | 0.4554  | Inf        | 17/8    | 184  | 0.68309      |
| IL_86336.1 | 280  | 110517 | 133  | 53255 | 0.4691  | 1.014474   | 9/2     | 185  | 0.69802      |
| IL_21077.1 | 159  | 110638 | 75   | 53313 | 0.4704  | 1.021577   | 8/2     | 186  | 0.69802      |
| IL_02835.1 | 4    | 110793 | 1    | 53387 | 0.4771  | 1.927443   | 13/4    | 187  | 0.70052      |
| IL_40892.1 | 94   | 110703 | 44   | 53344 | 0.4772  | 1.02947    | 8/3     | 188  | 0.70052      |
| IL_03110.1 | 362  | 110435 | 173  | 53215 | 0.4850  | 1.008302   | 13/5    | 189  | 0.70820      |
| IL_35043.1 | 6    | 110791 | 2    | 53386 | 0.4884  | 1.445586   | 10/3    | 190  | 0.70947      |
| IL_83250.1 | 112  | 110685 | 53   | 53335 | 0.4937  | 1.018288   | 11/5    | 191  | 0.71307      |
| IL_71942.1 | 8    | 110789 | 3    | 53385 | 0.4960  | 1.284918   | 10/2    | 192  | 0.71307      |
| IL_70401.1 | 10   | 110787 | 4    | 53384 | 0.5019  | 1.204633   | 11/3    | 193  | 0.71420      |
| IL_26868.1 | 400  | 110397 | 192  | 53196 | 0.5020  | 1.003877   | 10/5    | 194  | 0.71420      |
| IL_97191.1 | 14   | 110783 | 6    | 53382 | 0.5107  | 1.124336   | 13/7    | 195  | 0.72287      |
| IL_97833.1 | 28   | 110769 | 13   | 53375 | 0.5301  | 1.037831   | 14/8    | 196  | 0.74645      |
| IL_45794.1 | 42   | 110755 | 20   | 53368 | 0.5429  | 1.011903   | 11/5    | 197  | 0.76058      |
| IL_49493.4 | 109  | 110688 | 53   | 53335 | 0.5586  | 0.9909743  | 13/7    | 198  | 0.77872      |
| IL_49527.1 | 745  | 110052 | 362  | 53026 | 0.5663  | 0.9916048  | 10/4    | 199  | 0.77918      |
| IL_46034.3 | 82   | 110715 | 40   | 53348 | 0.5680  | 0.987792   | 8/3     | 200  | 0.77918      |
| IL_80652.1 | 15   | 110782 | 7    | 53381 | 0.5727  | 1.032519   | 13/6    | 201  | 0.77918      |
| IL_33842.1 | 25   | 110772 | 12   | 53376 | 0.5731  | 1.003864   | 7/4     | 202  | 0.77918      |
| IL_87394.1 | 25   | 110772 | 12   | 53376 | 0.5731  | 1.003864   | 10/2    | 203  | 0.77918      |
| IL_87523.1 | 128  | 110669 | 63   | 53325 | 0.5885  | 0.9789664  | 10/3    | 204  | 0.79622      |
| IL_85805.1 | 939  | 109858 | 458  | 52930 | 0.5972  | 0.987798   | 8/2     | 205  | 0.80406      |
| IL_54954.1 | 3    | 110794 | 1    | 53387 | 0.6071  | 1.445574   | 16/7    | 206  | 0.81334      |
| IL_82563.1 | 44   | 110753 | 22   | 53366 | 0.6129  | 0.9637125  | 10/3    | 207  | 0.81334      |
| IL_95652.3 | 30   | 110767 | 15   | 53373 | 0.6152  | 0.963717   | 14/7    | 208  | 0.81334      |
| IL_24293.1 | 72   | 110725 | 36   | 53352 | 0.6159  | 0.9637033  | 8/3     | 209  | 0.81334      |
| IL_37053.1 | 238  | 110559 | 118  | 53270 | 0.6241  | 0.9717888  | 12/6    | 210  | 0.82020      |
| IL_54470.1 | 329  | 110468 | 163  | 53225 | 0.6345  | 0.9724704  | 8/4     | 211  | 0.82867      |
| IL_91078.1 | 12   | 110785 | 6    | 53382 | 0.6372  | 0.963723   | 12/4    | 212  | 0.82867      |
| IL_48918.3 | 73   | 110724 | 37   | 53351 | 0.6416  | 0.9506537  | 12/6    | 213  | 0.82867      |
| IL_65137.1 | 91   | 110706 | 46   | 53342 | 0.6425  | 0.9531956  | 12/6    | 214  | 0.82867      |
| IL_92321.4 | 470  | 110327 | 233  | 53155 | 0.6553  | 0.9718353  | 12/6    | 215  | 0.84124      |

Continued on next page

Table E – continued from previous page

| ModelID    | A    | B      | C    | D     | P-value | Odds ratio | Nuc./Bp | Rank | Adj. p-value |
|------------|------|--------|------|-------|---------|------------|---------|------|--------------|
| IL_53988.1 | 98   | 110699 | 50   | 53338 | 0.6646  | 0.9443862  | 12/5    | 216  | 0.84661      |
| IL_12507.1 | 78   | 110719 | 40   | 53348 | 0.6657  | 0.9395745  | 11/4    | 217  | 0.84661      |
| IL_05513.1 | 1    | 110796 | 0    | 53388 | 0.6748  | Inf        | 12/3    | 218  | 0.84661      |
| IL_27668.1 | 1    | 110796 | 0    | 53388 | 0.6748  | Inf        | 11/3    | 219  | 0.84661      |
| IL_42891.1 | 1    | 110796 | 0    | 53388 | 0.6748  | Inf        | 14/3    | 220  | 0.84661      |
| IL_16415.2 | 15   | 110782 | 8    | 53380 | 0.6823  | 0.9034678  | 14/7    | 221  | 0.85131      |
| IL_03282.1 | 107  | 110690 | 55   | 53333 | 0.6847  | 0.9373664  | 10/5    | 222  | 0.85131      |
| IL_82188.2 | 217  | 110580 | 110  | 53278 | 0.6907  | 0.9504708  | 14/3    | 223  | 0.85485      |
| IL_75415.1 | 4    | 110793 | 2    | 53386 | 0.6964  | 0.9637256  | 10/2    | 224  | 0.85808      |
| IL_72158.3 | 126  | 110671 | 65   | 53323 | 0.7022  | 0.9339824  | 12/6    | 225  | 0.86135      |
| IL_78513.1 | 20   | 110777 | 11   | 53377 | 0.7120  | 0.8760839  | 8/2     | 226  | 0.86955      |
| IL_92114.3 | 73   | 110724 | 39   | 53349 | 0.7352  | 0.9018719  | 9/4     | 227  | 0.89181      |
| IL_89794.1 | 25   | 110772 | 14   | 53374 | 0.7367  | 0.8604327  | 11/7    | 228  | 0.89181      |
| IL_46990.1 | 1759 | 109038 | 870  | 52518 | 0.7445  | 0.9737936  | 10/2    | 229  | 0.89731      |
| IL_27640.1 | 2    | 110795 | 1    | 53387 | 0.7516  | 0.9637262  | 15/4    | 230  | 0.89797      |
| IL_86981.1 | 2    | 110795 | 1    | 53387 | 0.7516  | 0.9637262  | 15/8    | 231  | 0.89797      |
| IL_82650.1 | 10   | 110787 | 6    | 53382 | 0.7603  | 0.8030946  | 13/5    | 232  | 0.90453      |
| IL_59934.1 | 84   | 110713 | 46   | 53342 | 0.7869  | 0.8798237  | 12/5    | 233  | 0.93218      |
| IL_76486.1 | 3    | 110794 | 2    | 53386 | 0.8021  | 0.7227533  | 15/8    | 234  | 0.94344      |
| IL_31754.1 | 6    | 110791 | 4    | 53384 | 0.8033  | 0.7227458  | 13/7    | 235  | 0.94344      |
| IL_96446.1 | 111  | 110686 | 61   | 53327 | 0.8183  | 0.8767007  | 10/3    | 236  | 0.95701      |
| IL_44067.4 | 12   | 110785 | 8    | 53380 | 0.8305  | 0.7227308  | 14/6    | 237  | 0.96322      |
| IL_66744.1 | 72   | 110725 | 41   | 53347 | 0.8306  | 0.8460958  | 13/3    | 238  | 0.96322      |
| IL_98924.1 | 412  | 110385 | 215  | 53173 | 0.8395  | 0.9230835  | 9/3     | 239  | 0.96950      |
| IL_60649.1 | 45   | 110752 | 27   | 53361 | 0.8481  | 0.8030324  | 11/5    | 240  | 0.97529      |
| IL_62499.7 | 463  | 110334 | 242  | 53146 | 0.8571  | 0.9215694  | 7/4     | 241  | 0.98159      |
| IL_25307.1 | 59   | 110738 | 35   | 53353 | 0.8610  | 0.8121884  | 9/3     | 242  | 0.98198      |
| IL_31707.1 | 8    | 110789 | 6    | 53382 | 0.8658  | 0.6424372  | 11/4    | 243  | 0.98339      |
| IL_30840.2 | 2333 | 108464 | 1171 | 52217 | 0.8789  | 0.959153   | 11/5    | 244  | 0.99420      |
| IL_53323.1 | 1024 | 109773 | 528  | 52860 | 0.9025  | 0.9338958  | 10/3    | 245  | 1.00000      |
| IL_05221.1 | 3    | 110794 | 3    | 53385 | 0.9077  | 0.4818301  | 15/11   | 246  | 1.00000      |
| IL_52940.1 | 229  | 110568 | 129  | 53259 | 0.9294  | 0.8550962  | 14/6    | 247  | 1.00000      |
| IL_47687.1 | 236  | 110561 | 133  | 53255 | 0.9327  | 0.8547212  | 13/6    | 248  | 1.00000      |
| IL_94973.1 | 13   | 110784 | 11   | 53377 | 0.9432  | 0.5694015  | 14/6    | 249  | 1.00000      |
| IL_25181.1 | 1027 | 109770 | 540  | 52848 | 0.9528  | 0.9156363  | 13/5    | 250  | 1.00000      |
| IL_90735.1 | 18   | 110779 | 15   | 53373 | 0.9590  | 0.5781455  | 16/3    | 251  | 1.00000      |
| IL_27243.1 | 1    | 110796 | 2    | 53386 | 0.9656  | 0.240924   | 14/7    | 252  | 1.00000      |
| IL_68827.1 | 26   | 110771 | 23   | 53365 | 0.9879  | 0.5445731  | 11/4    | 253  | 1.00000      |
| IL_49976.1 | 1049 | 109748 | 589  | 52799 | 0.9986  | 0.8568302  | 8/5     | 254  | 1.00000      |
| IL_02359.3 | 0    | 110797 | 0    | 53388 | 1.0000  | 0          | 16/9    | 255  | 1.00000      |
| IL_16330.1 | 0    | 110797 | 0    | 53388 | 1.0000  | 0          | 25/5    | 256  | 1.00000      |
| IL_17682.1 | 0    | 110797 | 1    | 53387 | 1.0000  | 0          | 17/8    | 257  | 1.00000      |
| IL_21421.1 | 0    | 110797 | 0    | 53388 | 1.0000  | 0          | 20/7    | 258  | 1.00000      |
| IL_21495.1 | 0    | 110797 | 0    | 53388 | 1.0000  | 0          | 14/5    | 259  | 1.00000      |
| IL_23414.1 | 0    | 110797 | 0    | 53388 | 1.0000  | 0          | 21/5    | 260  | 1.00000      |
| IL_25230.3 | 0    | 110797 | 0    | 53388 | 1.0000  | 0          | 18/8    | 261  | 1.00000      |
| IL_33964.1 | 0    | 110797 | 0    | 53388 | 1.0000  | 0          | 20/6    | 262  | 1.00000      |
| IL_39324.1 | 0    | 110797 | 0    | 53388 | 1.0000  | 0          | 18/10   | 263  | 1.00000      |
| IL_40527.1 | 0    | 110797 | 0    | 53388 | 1.0000  | 0          | 15/5    | 264  | 1.00000      |
| IL_52610.1 | 0    | 110797 | 0    | 53388 | 1.0000  | 0          | 36/9    | 265  | 1.00000      |
| IL_57285.1 | 0    | 110797 | 0    | 53388 | 1.0000  | 0          | 13/4    | 266  | 1.00000      |
| IL_76095.3 | 0    | 110797 | 0    | 53388 | 1.0000  | 0          | 18/8    | 267  | 1.00000      |
| IL_76263.1 | 0    | 110797 | 0    | 53388 | 1.0000  | 0          | 17/3    | 268  | 1.00000      |
| IL_77076.1 | 0    | 110797 | 0    | 53388 | 1.0000  | 0          | 18/8    | 269  | 1.00000      |
| IL_77296.1 | 0    | 110797 | 0    | 53388 | 1.0000  | 0          | 14/2    | 270  | 1.00000      |
| IL_88367.1 | 0    | 110797 | 0    | 53388 | 1.0000  | 0          | 15/7    | 271  | 1.00000      |
| IL_89028.6 | 0    | 110797 | 0    | 53388 | 1.0000  | 0          | 13/5    | 272  | 1.00000      |
| IL_90057.1 | 0    | 110797 | 0    | 53388 | 1.0000  | 0          | 23/17   | 273  | 1.00000      |
| IL_91904.1 | 0    | 110797 | 0    | 53388 | 1.0000  | 0          | 13/4    | 274  | 1.00000      |

Continued on next page

Table E – continued from previous page

| ModelID    | A | B      | C | D     | P-value | Odds ratio | Nuc./Bp | Rank | Adj. p-value |
|------------|---|--------|---|-------|---------|------------|---------|------|--------------|
| IL_97842.1 | 0 | 110797 | 0 | 53388 | 1.0000  | 0          | 16/5    | 275  | 1.00000      |
| IL_98655.1 | 0 | 110797 | 0 | 53388 | 1.0000  | 0          | 13/5    | 276  | 1.00000      |

Table F: Results of Fisher’s exact test according to FET scheme (see Supplementary Material S6) for JAR3D IL module predictions of all JAR3D IL models together with mean interior edit distance  $\leq 4$ , passed cutoff  $\geq 50$ , and average 3D sequence length  $\geq 9$ .

| Order | Model | A     | B     | C    | D     | P-value      | Odds ratio |
|-------|-------|-------|-------|------|-------|--------------|------------|
| H     | all   | 20309 | 88776 | 9324 | 43117 | 2.311515e-05 | 1.057894   |
| L     | all   | 19944 | 86698 | 9324 | 43117 | 4.032838e-06 | 1.063783   |
| R     | all   | 20488 | 87348 | 9324 | 43117 | 1.861548e-09 | 1.084674   |

Table G: Results of Fisher’s exact test according to FET scheme (see Supplementary Material S6) for JAR3D HL module predictions for SISSIz and original data of order L. Brown highlighted rows have a significant p-value after multiple testing correction using the Benjamini-Hochberg procedure at a 5% false discovery rate (adjusted p-value). “Nuc./Bp” denotes the total strand length and the number of base pairs.

| ModelID    | A     | B      | C    | D     | P-value      | Odds ratio | Nuc./Bp | Rank | Adj. p-value      |
|------------|-------|--------|------|-------|--------------|------------|---------|------|-------------------|
| HL_75759.4 | 5604  | 103959 | 2287 | 51101 | 7.009408e-14 | 1.204449   | 3/1     | 1    | 1.773380224e-11   |
| HL_35865.1 | 5818  | 103745 | 2436 | 50952 | 4.03886e-11  | 1.17296    | 5/1     | 2    | 5.1091579e-09     |
| HL_87554.1 | 1844  | 107719 | 705  | 52683 | 1.124556e-08 | 1.279282   | 5/1     | 3    | 8.607559675e-07   |
| HL_06643.3 | 5252  | 104311 | 2233 | 51155 | 1.360879e-08 | 1.153423   | 5/2     | 4    | 8.607559675e-07   |
| HL_90542.1 | 999   | 108564 | 358  | 53030 | 1.780895e-07 | 1.363093   | 7/2     | 5    | 9.0113287e-06     |
| HL_74559.1 | 2744  | 106819 | 1138 | 52250 | 1.601183e-06 | 1.179432   | 4/1     | 6    | 6.75165498333e-05 |
| HL_97499.1 | 2020  | 107543 | 823  | 52565 | 5.523972e-06 | 1.199659   | 4/1     | 7    | 0.00020           |
| HL_42677.2 | 4451  | 105112 | 1935 | 51453 | 8.935428e-06 | 1.125983   | 3/1     | 8    | 0.00028           |
| HL_30008.1 | 1970  | 107593 | 807  | 52581 | 1.257518e-05 | 1.192971   | 5/1     | 9    | 0.00035           |
| HL_10378.1 | 1670  | 107893 | 674  | 52714 | 1.414211e-05 | 1.210542   | 4/1     | 10   | 0.00036           |
| HL_05361.1 | 550   | 109013 | 192  | 53196 | 2.633234e-05 | 1.397866   | 6/2     | 11   | 0.00061           |
| HL_63941.1 | 4344  | 105219 | 1903 | 51485 | 3.761264e-05 | 1.116953   | 4/1     | 12   | 0.00076           |
| HL_74505.1 | 4075  | 105488 | 1779 | 51609 | 3.911024e-05 | 1.120653   | 4/1     | 13   | 0.00076           |
| HL_59604.1 | 2217  | 107346 | 940  | 52448 | 0.0001       | 1.152329   | 3/1     | 14   | 0.00266           |
| HL_65071.1 | 933   | 108630 | 366  | 53022 | 0.0002       | 1.244212   | 4/1     | 15   | 0.00326           |
| HL_75850.1 | 3866  | 105697 | 1705 | 51683 | 0.0002       | 1.108716   | 5/1     | 16   | 0.00373           |
| HL_99207.1 | 1816  | 107747 | 764  | 52624 | 0.0003       | 1.160904   | 7/3     | 17   | 0.00428           |
| HL_34027.2 | 7001  | 102562 | 3180 | 50208 | 0.0003       | 1.07776    | 6/1     | 18   | 0.00483           |
| HL_59225.1 | 1953  | 107610 | 838  | 52550 | 0.0009       | 1.138085   | 5/1     | 19   | 0.01250           |
| HL_57514.2 | 9121  | 100442 | 4207 | 49181 | 0.0011       | 1.061583   | 4/1     | 20   | 0.01337           |
| HL_17790.1 | 2113  | 107450 | 916  | 52472 | 0.0014       | 1.126477   | 3/1     | 21   | 0.01715           |
| HL_35619.2 | 1451  | 108112 | 615  | 52773 | 0.0018       | 1.151664   | 5/2     | 22   | 0.01914           |
| HL_86115.1 | 3996  | 105567 | 1795 | 51593 | 0.0018       | 1.087993   | 4/2     | 23   | 0.01914           |
| HL_17723.4 | 1735  | 107828 | 745  | 52643 | 0.0018       | 1.13697    | 7/1     | 24   | 0.01914           |
| HL_03785.1 | 3736  | 105827 | 1675 | 51713 | 0.0020       | 1.089918   | 5/1     | 25   | 0.02021           |
| HL_26579.1 | 656   | 108907 | 262  | 53126 | 0.0032       | 1.221361   | 5/2     | 26   | 0.03118           |
| HL_75579.2 | 15795 | 93768  | 7437 | 45951 | 0.0043       | 1.040791   | 3/1     | 27   | 0.03986           |

Continued on next page

Table G – continued from previous page

| ModelID    | A     | B      | C    | D     | P-value | Odds ratio | Nuc./Bp | Rank | Adj. p-value |
|------------|-------|--------|------|-------|---------|------------|---------|------|--------------|
| HL_68435.1 | 831   | 108732 | 343  | 53045 | 0.0048  | 1.181919   | 7/2     | 28   | 0.04351      |
| HL_45018.3 | 862   | 108701 | 358  | 53030 | 0.0055  | 1.174645   | 10/4    | 29   | 0.04789      |
| HL_73465.1 | 28    | 109535 | 4    | 53384 | 0.0083  | 3.411463   | 11/2    | 30   | 0.07018      |
| HL_01418.1 | 1536  | 108027 | 671  | 52717 | 0.0089  | 1.117081   | 5/1     | 31   | 0.07304      |
| HL_00721.1 | 1277  | 108286 | 552  | 52836 | 0.0093  | 1.128773   | 2/1     | 32   | 0.07321      |
| HL_42077.2 | 14710 | 94853  | 6949 | 46439 | 0.0112  | 1.03639    | 5/2     | 33   | 0.08590      |
| HL_00090.1 | 744   | 108819 | 311  | 53077 | 0.0118  | 1.166834   | 11/1    | 34   | 0.08776      |
| HL_18587.1 | 824   | 108739 | 348  | 53040 | 0.0128  | 1.154946   | 8/2     | 35   | 0.09277      |
| HL_24707.1 | 1691  | 107872 | 748  | 52640 | 0.0136  | 1.103183   | 4/2     | 36   | 0.09368      |
| HL_98523.2 | 4894  | 104669 | 2257 | 51131 | 0.0137  | 1.059254   | 6/1     | 37   | 0.09368      |
| HL_46489.2 | 940   | 108623 | 403  | 52985 | 0.0160  | 1.13776    | 9/2     | 38   | 0.10667      |
| HL_99584.1 | 1284  | 108279 | 563  | 52825 | 0.0185  | 1.112628   | 4/1     | 39   | 0.12003      |
| HL_72273.1 | 736   | 108827 | 312  | 53076 | 0.0202  | 1.150484   | 6/2     | 40   | 0.12762      |
| HL_48116.2 | 8582  | 100981 | 4028 | 49360 | 0.0209  | 1.041443   | 6/1     | 41   | 0.12866      |
| HL_33277.1 | 1573  | 107990 | 701  | 52687 | 0.0246  | 1.094786   | 7/1     | 42   | 0.14837      |
| HL_98833.3 | 738   | 108825 | 317  | 53071 | 0.0313  | 1.135331   | 8/2     | 43   | 0.18404      |
| HL_19905.3 | 7800  | 101763 | 3670 | 49718 | 0.0354  | 1.038372   | 4/1     | 44   | 0.20364      |
| HL_48039.2 | 18163 | 91400  | 8664 | 44724 | 0.0376  | 1.025803   | 4/1     | 45   | 0.21165      |
| HL_50312.1 | 4273  | 105290 | 1991 | 51397 | 0.0473  | 1.047643   | 6/1     | 46   | 0.26022      |
| HL_36842.1 | 1981  | 107582 | 904  | 52484 | 0.0512  | 1.069062   | 8/2     | 47   | 0.26135      |
| HL_78420.1 | 546   | 109017 | 234  | 53154 | 0.0529  | 1.137667   | 9/1     | 48   | 0.26135      |
| HL_66877.1 | 170   | 109393 | 65   | 53323 | 0.0534  | 1.274809   | 11/4    | 49   | 0.26135      |
| HL_24711.1 | 713   | 108850 | 311  | 53077 | 0.0538  | 1.117905   | 7/2     | 50   | 0.26135      |
| HL_73972.1 | 950   | 108613 | 421  | 52967 | 0.0542  | 1.100433   | 6/3     | 51   | 0.26135      |
| HL_41827.1 | 1121  | 108442 | 501  | 52887 | 0.0553  | 1.091234   | 7/2     | 52   | 0.26135      |
| HL_21675.3 | 7352  | 102211 | 3470 | 49918 | 0.0554  | 1.034752   | 5/2     | 53   | 0.26135      |
| HL_34108.2 | 9524  | 100039 | 4515 | 48873 | 0.0566  | 1.030533   | 4/1     | 54   | 0.26135      |
| HL_95716.1 | 5768  | 103795 | 2711 | 50677 | 0.0568  | 1.038797   | 5/1     | 55   | 0.26135      |
| HL_78361.1 | 639   | 108924 | 279  | 53109 | 0.0662  | 1.116707   | 8/2     | 56   | 0.29892      |
| HL_78507.1 | 2103  | 107460 | 968  | 52420 | 0.0716  | 1.059775   | 5/1     | 57   | 0.31766      |
| HL_27397.1 | 370   | 109193 | 157  | 53231 | 0.0785  | 1.148863   | 7/2     | 58   | 0.34203      |
| HL_44467.1 | 38    | 109525 | 11   | 53377 | 0.0798  | 1.683567   | 8/1     | 59   | 0.34203      |
| HL_30128.1 | 915   | 108648 | 411  | 52977 | 0.0884  | 1.085535   | 9/2     | 60   | 0.37282      |
| HL_38138.1 | 820   | 108743 | 367  | 53021 | 0.0916  | 1.089415   | 6/1     | 61   | 0.37987      |
| HL_48254.1 | 1365  | 108198 | 625  | 52763 | 0.1012  | 1.065031   | 9/2     | 62   | 0.41304      |
| HL_05113.1 | 86    | 109477 | 32   | 53356 | 0.1122  | 1.309857   | 7/1     | 63   | 0.44363      |
| HL_56809.1 | 86    | 109477 | 32   | 53356 | 0.1122  | 1.309857   | 4/1     | 64   | 0.44363      |
| HL_42345.1 | 1066  | 108497 | 487  | 52901 | 0.1232  | 1.067269   | 7/1     | 65   | 0.47972      |
| HL_58601.1 | 3688  | 105875 | 1739 | 51649 | 0.1282  | 1.034571   | 5/2     | 66   | 0.49160      |
| HL_23182.1 | 1162  | 108401 | 534  | 52854 | 0.1354  | 1.060984   | 8/2     | 67   | 0.51119      |
| HL_55202.1 | 14    | 109549 | 3    | 53385 | 0.1410  | 2.274131   | 13/2    | 68   | 0.51752      |
| HL_30731.1 | 1573  | 107990 | 730  | 52658 | 0.1411  | 1.050718   | 4/1     | 69   | 0.51752      |
| HL_33451.1 | 8     | 109555 | 1    | 53387 | 0.1512  | 3.898066   | 11/1    | 70   | 0.54663      |
| HL_97270.3 | 2701  | 106862 | 1271 | 52117 | 0.1534  | 1.03642    | 7/2     | 71   | 0.54666      |
| HL_52116.1 | 753   | 108810 | 344  | 53044 | 0.1680  | 1.067096   | 7/2     | 72   | 0.59017      |
| HL_44522.1 | 163   | 109400 | 69   | 53319 | 0.1814  | 1.151329   | 5/2     | 73   | 0.62872      |
| HL_53015.1 | 544   | 109019 | 248  | 53140 | 0.2026  | 1.069217   | 8/3     | 74   | 0.65451      |
| HL_90579.3 | 440   | 109123 | 199  | 53189 | 0.2030  | 1.077716   | 10/2    | 75   | 0.65451      |
| HL_33875.1 | 675   | 108888 | 310  | 53078 | 0.2031  | 1.061393   | 11/3    | 76   | 0.65451      |
| HL_66174.1 | 980   | 108583 | 455  | 52933 | 0.2042  | 1.049975   | 9/4     | 77   | 0.65451      |
| HL_08203.1 | 55    | 109508 | 21   | 53367 | 0.2042  | 1.276306   | 9/4     | 78   | 0.65451      |
| HL_24473.3 | 4     | 109559 | 0    | 53388 | 0.2044  | Inf        | 13/4    | 79   | 0.65451      |
| HL_57923.1 | 247   | 109316 | 109  | 53279 | 0.2106  | 1.104438   | 7/2     | 80   | 0.66587      |
| HL_93530.1 | 1008  | 108555 | 470  | 52918 | 0.2225  | 1.045481   | 7/1     | 81   | 0.69508      |
| HL_84888.1 | 439   | 109124 | 200  | 53188 | 0.2279  | 1.069861   | 9/3     | 82   | 0.70311      |
| HL_91872.1 | 449   | 109114 | 205  | 53183 | 0.2327  | 1.06754    | 9/3     | 83   | 0.70624      |
| HL_93567.1 | 1763  | 107800 | 833  | 52555 | 0.2367  | 1.031788   | 7/1     | 84   | 0.70624      |
| HL_53789.1 | 2048  | 107515 | 970  | 52418 | 0.2373  | 1.029366   | 6/1     | 85   | 0.70624      |
| HL_63304.1 | 14    | 109549 | 4    | 53384 | 0.2469  | 1.705569   | 15/1    | 86   | 0.72629      |

Continued on next page

Table G – continued from previous page

| ModelID    | A     | B      | C     | D     | P-value | Odds ratio | Nuc./Bp | Rank | Adj. p-value |
|------------|-------|--------|-------|-------|---------|------------|---------|------|--------------|
| HL_17008.1 | 28    | 109535 | 10    | 53378 | 0.2540  | 1.364508   | 10/2    | 87   | 0.72961      |
| HL_20028.1 | 166   | 109397 | 73    | 53315 | 0.2553  | 1.108224   | 8/1     | 88   | 0.72961      |
| HL_82294.3 | 2977  | 106586 | 1420  | 51968 | 0.2567  | 1.022178   | 7/2     | 89   | 0.72961      |
| HL_18156.2 | 253   | 109310 | 114   | 53274 | 0.2626  | 1.081609   | 7/2     | 90   | 0.73819      |
| HL_42094.1 | 636   | 108927 | 296   | 53092 | 0.2686  | 1.04727    | 5/2     | 91   | 0.74667      |
| HL_74686.1 | 249   | 109314 | 114   | 53274 | 0.3117  | 1.06447    | 10/2    | 92   | 0.85055      |
| HL_25175.1 | 8     | 109555 | 2     | 53386 | 0.3127  | 1.949187   | 16/4    | 93   | 0.85055      |
| HL_33640.1 | 609   | 108954 | 287   | 53101 | 0.3339  | 1.034152   | 8/1     | 94   | 0.89877      |
| HL_74465.5 | 863   | 108700 | 411   | 52977 | 0.3629  | 1.023375   | 9/1     | 95   | 0.95886      |
| HL_13707.2 | 66    | 109497 | 29    | 53359 | 0.3654  | 1.109046   | 8/3     | 96   | 0.95886      |
| HL_62970.1 | 238   | 109325 | 111   | 53277 | 0.3750  | 1.044898   | 13/4    | 97   | 0.95886      |
| HL_66880.1 | 57    | 109506 | 25    | 53363 | 0.3787  | 1.111054   | 11/1    | 98   | 0.95886      |
| HL_68081.3 | 1533  | 108030 | 736   | 52652 | 0.3789  | 1.015161   | 8/2     | 99   | 0.95886      |
| HL_27429.3 | 221   | 109342 | 103   | 53285 | 0.3790  | 1.045617   | 9/1     | 100  | 0.95886      |
| HL_82288.1 | 574   | 108989 | 273   | 53115 | 0.3859  | 1.02469    | 6/1     | 101  | 0.96660      |
| HL_65347.1 | 513   | 109050 | 245   | 53143 | 0.4143  | 1.020417   | 10/3    | 102  | 1.00000      |
| HL_57217.1 | 434   | 109129 | 207   | 53181 | 0.4179  | 1.021745   | 8/2     | 103  | 1.00000      |
| HL_78731.1 | 843   | 108720 | 405   | 52983 | 0.4201  | 1.014385   | 9/1     | 104  | 1.00000      |
| HL_87223.1 | 135   | 109428 | 63    | 53325 | 0.4210  | 1.044228   | 7/1     | 105  | 1.00000      |
| HL_44390.1 | 13    | 109550 | 5     | 53383 | 0.4325  | 1.266921   | 11/3    | 106  | 1.00000      |
| HL_96915.1 | 602   | 108961 | 289   | 53099 | 0.4328  | 1.01512    | 9/2     | 107  | 1.00000      |
| HL_11547.2 | 306   | 109257 | 146   | 53242 | 0.4388  | 1.021363   | 8/1     | 108  | 1.00000      |
| HL_42436.1 | 2     | 109561 | 0     | 53388 | 0.4521  | Inf        | 15/3    | 109  | 1.00000      |
| HL_15603.2 | 77    | 109486 | 36    | 53352 | 0.4629  | 1.042264   | 12/1    | 110  | 1.00000      |
| HL_23195.1 | 4     | 109559 | 1     | 53387 | 0.4722  | 1.949152   | 17/3    | 111  | 1.00000      |
| HL_94578.1 | 365   | 109198 | 176   | 53212 | 0.4747  | 1.010594   | 6/3     | 112  | 1.00000      |
| HL_66948.1 | 482   | 109081 | 233   | 53155 | 0.4777  | 1.008062   | 7/2     | 113  | 1.00000      |
| HL_12706.1 | 1593  | 107970 | 774   | 52614 | 0.4833  | 1.002936   | 4/2     | 114  | 1.00000      |
| HL_20920.1 | 8     | 109555 | 3     | 53385 | 0.4889  | 1.299487   | 11/3    | 115  | 1.00000      |
| HL_72543.2 | 308   | 109255 | 149   | 53239 | 0.4932  | 1.007288   | 10/3    | 116  | 1.00000      |
| HL_62967.1 | 9344  | 100219 | 4554  | 48834 | 0.5084  | 0.9997828  | 5/3     | 117  | 1.00000      |
| HL_42969.1 | 24    | 109539 | 11    | 53377 | 0.5131  | 1.063172   | 10/1    | 118  | 1.00000      |
| HL_83865.1 | 5284  | 104279 | 2576  | 50812 | 0.5134  | 0.9995082  | 6/1     | 119  | 1.00000      |
| HL_28676.1 | 1317  | 108246 | 643   | 52745 | 0.5270  | 0.9980315  | 6/1     | 120  | 1.00000      |
| HL_01926.3 | 1067  | 108496 | 521   | 52867 | 0.5273  | 0.9979244  | 8/3     | 121  | 1.00000      |
| HL_76585.1 | 475   | 109088 | 232   | 53156 | 0.5295  | 0.9976563  | 9/2     | 122  | 1.00000      |
| HL_19226.1 | 524   | 109039 | 256   | 53132 | 0.5306  | 0.9973914  | 5/1     | 123  | 1.00000      |
| HL_11376.1 | 23882 | 85681  | 11647 | 41741 | 0.5361  | 0.9989297  | 5/1     | 124  | 1.00000      |
| HL_24544.2 | 2126  | 107437 | 1039  | 52349 | 0.5396  | 0.9970162  | 8/3     | 125  | 1.00000      |
| HL_65249.1 | 8634  | 100929 | 4214  | 49174 | 0.5400  | 0.9982448  | 6/2     | 126  | 1.00000      |
| HL_93263.1 | 328   | 109235 | 161   | 53227 | 0.5516  | 0.9927003  | 2/1     | 127  | 1.00000      |
| HL_21545.1 | 2149  | 107414 | 1056  | 52332 | 0.5974  | 0.9914662  | 6/1     | 128  | 1.00000      |
| HL_06997.2 | 16    | 109547 | 8     | 53380 | 0.6177  | 0.9745379  | 12/2    | 129  | 1.00000      |
| HL_93771.1 | 2734  | 106829 | 1347  | 52041 | 0.6383  | 0.9887479  | 6/1     | 130  | 1.00000      |
| HL_86398.1 | 82    | 109481 | 42    | 53346 | 0.6436  | 0.9513231  | 11/3    | 131  | 1.00000      |
| HL_46175.2 | 484   | 109079 | 242   | 53146 | 0.6449  | 0.9744286  | 10/2    | 132  | 1.00000      |
| HL_11509.2 | 407   | 109156 | 204   | 53184 | 0.6469  | 0.9720451  | 10/3    | 133  | 1.00000      |
| HL_55718.1 | 8095  | 101468 | 3973  | 49415 | 0.6542  | 0.9922638  | 3/1     | 134  | 1.00000      |
| HL_85044.1 | 21    | 109542 | 11    | 53377 | 0.6556  | 0.9302528  | 11/2    | 135  | 1.00000      |
| HL_17537.1 | 181   | 109382 | 92    | 53296 | 0.6556  | 0.9586119  | 8/1     | 136  | 1.00000      |
| HL_79902.1 | 195   | 109368 | 99    | 53289 | 0.6558  | 0.9597349  | 8/3     | 137  | 1.00000      |
| HL_88960.1 | 402   | 109161 | 202   | 53186 | 0.6571  | 0.969597   | 8/2     | 138  | 1.00000      |
| HL_62880.1 | 2961  | 106602 | 1461  | 51927 | 0.6607  | 0.9872195  | 6/1     | 139  | 1.00000      |
| HL_85534.1 | 335   | 109228 | 169   | 53219 | 0.6628  | 0.9658319  | 7/3     | 140  | 1.00000      |
| HL_20806.1 | 1     | 109562 | 0     | 53388 | 0.6724  | Inf        | 11/2    | 141  | 1.00000      |
| HL_98577.1 | 1     | 109562 | 0     | 53388 | 0.6724  | Inf        | 13/2    | 142  | 1.00000      |
| HL_26495.1 | 375   | 109188 | 190   | 53198 | 0.6871  | 0.9616226  | 8/1     | 143  | 1.00000      |
| HL_94697.1 | 139   | 109424 | 72    | 53316 | 0.6917  | 0.9406496  | 11/2    | 144  | 1.00000      |
| HL_50059.1 | 620   | 108943 | 312   | 53076 | 0.6926  | 0.9681637  | 7/4     | 145  | 1.00000      |

Continued on next page



Table G – continued from previous page

| ModelID     | A     | B      | C     | D     | P-value | Odds ratio | Nuc./Bp | Rank | Adj. p-value |
|-------------|-------|--------|-------|-------|---------|------------|---------|------|--------------|
| HL_13786.1  | 2675  | 106888 | 1325  | 52063 | 0.6957  | 0.9833411  | 5/1     | 146  | 1.00000      |
| HL_38897.1  | 113   | 109450 | 59    | 53329 | 0.6979  | 0.9332003  | 7/1     | 147  | 1.00000      |
| HL_58083.2  | 263   | 109300 | 135   | 53253 | 0.7088  | 0.949175   | 9/2     | 148  | 1.00000      |
| HL_60200.1  | 1089  | 108474 | 546   | 52842 | 0.7174  | 0.9715771  | 8/2     | 149  | 1.00000      |
| HL_95049.1  | 687   | 108876 | 348   | 53040 | 0.7346  | 0.9617354  | 8/1     | 150  | 1.00000      |
| HL_68733.1  | 191   | 109372 | 100   | 53288 | 0.7418  | 0.9305881  | 8/1     | 151  | 1.00000      |
| HL_46570.1  | 937   | 108626 | 473   | 52915 | 0.7452  | 0.9650137  | 8/1     | 152  | 1.00000      |
| HL_59182.1  | 2     | 109561 | 1     | 53387 | 0.7483  | 0.9745412  | 15/2    | 153  | 1.00000      |
| HL_32644.2  | 342   | 109221 | 177   | 53211 | 0.7585  | 0.9413447  | 10/3    | 154  | 1.00000      |
| HL_24108.1  | 63    | 109500 | 35    | 53353 | 0.7691  | 0.877043   | 8/2     | 155  | 1.00000      |
| HL_54751.2  | 59    | 109504 | 33    | 53355 | 0.7738  | 0.8711387  | 11/2    | 156  | 1.00000      |
| HL_29196.1  | 570   | 108993 | 293   | 53095 | 0.7834  | 0.9476821  | 6/1     | 157  | 1.00000      |
| HL_58223.1  | 166   | 109397 | 89    | 53299 | 0.7875  | 0.908727   | 5/1     | 158  | 1.00000      |
| HL_96994.1  | 11    | 109552 | 7     | 53381 | 0.7923  | 0.7657342  | 11/1    | 159  | 1.00000      |
| HL_82538.1  | 21233 | 88330  | 10437 | 42951 | 0.7936  | 0.9892345  | 5/1     | 160  | 1.00000      |
| HL_19528.1  | 504   | 109059 | 261   | 53127 | 0.7995  | 0.9406854  | 9/3     | 161  | 1.00000      |
| HL_23129.1  | 50    | 109513 | 29    | 53359 | 0.8080  | 0.8400808  | 9/2     | 162  | 1.00000      |
| HL_07915.1  | 554   | 109009 | 287   | 53101 | 0.8111  | 0.9403051  | 6/1     | 163  | 1.00000      |
| HL_87844.2  | 2332  | 107231 | 1172  | 52216 | 0.8135  | 0.9689421  | 6/2     | 164  | 1.00000      |
| HL_04194.1  | 322   | 109241 | 170   | 53218 | 0.8149  | 0.9227434  | 7/3     | 165  | 1.00000      |
| HL_85018.1  | 83    | 109480 | 47    | 53341 | 0.8210  | 0.8604222  | 10/1    | 166  | 1.00000      |
| HL_84289.1  | 27    | 109536 | 17    | 53371 | 0.8393  | 0.7738897  | 11/2    | 167  | 1.00000      |
| HL_62881.1  | 494   | 109069 | 260   | 53128 | 0.8524  | 0.9255007  | 10/4    | 168  | 1.00000      |
| HL_76679.1  | 3499  | 106064 | 1758  | 51630 | 0.8598  | 0.9688864  | 5/2     | 169  | 1.00000      |
| HL_72498.12 | 791   | 108772 | 411   | 52977 | 0.8622  | 0.9373582  | 7/2     | 170  | 1.00000      |
| HL_77692.1  | 598   | 108965 | 314   | 53074 | 0.8665  | 0.927614   | 10/4    | 171  | 1.00000      |
| HL_45411.1  | 677   | 108886 | 354   | 53034 | 0.8668  | 0.9314694  | 8/2     | 172  | 1.00000      |
| HL_67761.1  | 4056  | 105507 | 2039  | 51349 | 0.8818  | 0.9681542  | 6/1     | 173  | 1.00000      |
| HL_64371.2  | 27    | 109536 | 18    | 53370 | 0.8825  | 0.7308323  | 12/2    | 174  | 1.00000      |
| HL_88311.2  | 541   | 109022 | 287   | 53101 | 0.8854  | 0.9181322  | 7/3     | 175  | 1.00000      |
| HL_82243.1  | 1189  | 108374 | 616   | 52772 | 0.8971  | 0.9398969  | 9/1     | 176  | 1.00000      |
| HL_39486.1  | 4127  | 105436 | 2079  | 51309 | 0.8986  | 0.9660417  | 7/1     | 177  | 1.00000      |
| HL_39895.6  | 5389  | 104174 | 2704  | 50684 | 0.9008  | 0.9696169  | 5/2     | 178  | 1.00000      |
| HL_80492.2  | 68    | 109495 | 42    | 53346 | 0.9042  | 0.7888252  | 8/4     | 179  | 1.00000      |
| HL_25195.1  | 3     | 109560 | 3     | 53385 | 0.9054  | 0.4872563  | 12/2    | 180  | 1.00000      |
| HL_30366.1  | 257   | 109306 | 144   | 53244 | 0.9181  | 0.8693638  | 11/5    | 181  | 1.00000      |
| HL_69403.1  | 176   | 109387 | 102   | 53286 | 0.9269  | 0.8405565  | 9/3     | 182  | 1.00000      |
| HL_65802.1  | 255   | 109308 | 144   | 53244 | 0.9285  | 0.8625837  | 11/3    | 183  | 1.00000      |
| HL_35200.1  | 1558  | 108005 | 808   | 52580 | 0.9289  | 0.9387143  | 6/1     | 184  | 1.00000      |
| HL_42553.1  | 15    | 109548 | 12    | 53376 | 0.9302  | 0.6090377  | 10/3    | 185  | 1.00000      |
| HL_70912.1  | 586   | 108977 | 316   | 53072 | 0.9316  | 0.9031151  | 7/1     | 186  | 1.00000      |
| HL_91226.3  | 1384  | 108179 | 722   | 52666 | 0.9352  | 0.9332265  | 8/1     | 187  | 1.00000      |
| HL_38898.1  | 329   | 109234 | 184   | 53204 | 0.9383  | 0.8709007  | 8/1     | 188  | 1.00000      |
| HL_39872.2  | 644   | 108919 | 347   | 53041 | 0.9387  | 0.9037876  | 8/2     | 189  | 1.00000      |
| HL_84768.1  | 502   | 109061 | 274   | 53114 | 0.9391  | 0.8922679  | 4/1     | 190  | 1.00000      |
| HL_18781.4  | 1872  | 107691 | 969   | 52419 | 0.9403  | 0.9403553  | 8/2     | 191  | 1.00000      |
| HL_80459.3  | 14823 | 94740  | 7373  | 46015 | 0.9405  | 0.9764514  | 5/1     | 192  | 1.00000      |
| HL_47784.2  | 604   | 108959 | 327   | 53061 | 0.9416  | 0.8995052  | 11/2    | 193  | 1.00000      |
| HL_23290.1  | 1127  | 108436 | 594   | 52794 | 0.9427  | 0.9237397  | 7/1     | 194  | 1.00000      |
| HL_68697.2  | 12017 | 97546  | 5997  | 47391 | 0.9460  | 0.9735069  | 6/1     | 195  | 1.00000      |
| HL_91613.1  | 11    | 109552 | 10    | 53378 | 0.9505  | 0.5359408  | 10/3    | 196  | 1.00000      |
| HL_33402.3  | 1587  | 107976 | 830   | 52558 | 0.9537  | 0.9307034  | 7/2     | 197  | 1.00000      |
| HL_65924.1  | 2     | 109561 | 3     | 53385 | 0.9575  | 0.3248442  | 14/4    | 198  | 1.00000      |
| HL_56775.1  | 595   | 108968 | 329   | 53059 | 0.9694  | 0.8806118  | 7/2     | 199  | 1.00000      |
| HL_16770.1  | 164   | 109399 | 101   | 53287 | 0.9716  | 0.7909402  | 10/2    | 200  | 1.00000      |
| HL_39942.2  | 881   | 108682 | 478   | 52910 | 0.9726  | 0.8972851  | 7/1     | 201  | 1.00000      |
| HL_38130.2  | 25    | 109538 | 21    | 53367 | 0.9761  | 0.5799887  | 11/1    | 202  | 1.00000      |
| HL_19132.1  | 309   | 109254 | 181   | 53207 | 0.9775  | 0.8314178  | 8/3     | 203  | 1.00000      |
| HL_78228.1  | 666   | 108897 | 372   | 53016 | 0.9837  | 0.8716184  | 12/2    | 204  | 1.00000      |

Continued on next page

Table G – continued from previous page

| ModelID     | A     | B      | C     | D     | P-value | Odds ratio | Nuc./Bp | Rank | Adj. p-value |
|-------------|-------|--------|-------|-------|---------|------------|---------|------|--------------|
| HL_60203.1  | 162   | 109401 | 103   | 53285 | 0.9846  | 0.7660876  | 5/2     | 205  | 1.00000      |
| HL_39422.1  | 541   | 109022 | 308   | 53080 | 0.9864  | 0.8552022  | 7/1     | 206  | 1.00000      |
| HL_66467.1  | 2305  | 107258 | 1215  | 52173 | 0.9878  | 0.9228091  | 5/1     | 207  | 1.00000      |
| HL_41833.2  | 51    | 109512 | 40    | 53348 | 0.9904  | 0.621097   | 11/4    | 208  | 1.00000      |
| HL_48480.1  | 640   | 108923 | 365   | 53023 | 0.9923  | 0.8535667  | 7/1     | 209  | 1.00000      |
| HL_49492.1  | 2     | 109561 | 5     | 53383 | 0.9938  | 0.1949056  | 14/4    | 210  | 1.00000      |
| HL_64543.2  | 1458  | 108105 | 793   | 52595 | 0.9941  | 0.8945105  | 9/2     | 211  | 1.00000      |
| HL_86123.2  | 927   | 108636 | 519   | 52869 | 0.9947  | 0.8692485  | 10/2    | 212  | 1.00000      |
| HL_08382.2  | 15222 | 94341  | 7681  | 45707 | 0.9965  | 0.9601591  | 6/1     | 213  | 1.00000      |
| HL_49036.3  | 23814 | 85749  | 11922 | 41466 | 0.9968  | 0.9659612  | 6/2     | 214  | 1.00000      |
| HL_52574.3  | 4400  | 105163 | 2298  | 51090 | 0.9971  | 0.9302002  | 7/1     | 215  | 1.00000      |
| HL_37962.1  | 246   | 109317 | 159   | 53229 | 0.9975  | 0.7533249  | 8/2     | 216  | 1.00000      |
| HL_61547.5  | 16430 | 93133  | 8292  | 45096 | 0.9977  | 0.959443   | 6/1     | 217  | 1.00000      |
| HL_47337.1  | 4597  | 104966 | 2402  | 50986 | 0.9977  | 0.9296183  | 5/1     | 218  | 1.00000      |
| HL_06122.1  | 1626  | 107937 | 897   | 52491 | 0.9987  | 0.8815479  | 7/3     | 219  | 1.00000      |
| HL_98233.1  | 86    | 109477 | 69    | 53319 | 0.9991  | 0.6070172  | 8/1     | 220  | 1.00000      |
| HL_68579.1  | 346   | 109217 | 221   | 53167 | 0.9992  | 0.7621725  | 6/2     | 221  | 1.00000      |
| HL_99633.1  | 514   | 109049 | 314   | 53074 | 0.9992  | 0.7967206  | 8/3     | 222  | 1.00000      |
| HL_34440.1  | 2062  | 107501 | 1130  | 52258 | 0.9993  | 0.8870608  | 6/1     | 223  | 1.00000      |
| HL_59610.1  | 1643  | 107920 | 916   | 52472 | 0.9995  | 0.872111   | 5/1     | 224  | 1.00000      |
| HL_49210.1  | 702   | 108861 | 420   | 52968 | 0.9996  | 0.8132785  | 7/2     | 225  | 1.00000      |
| HL_62228.3  | 6568  | 102995 | 3427  | 49961 | 0.9996  | 0.929683   | 6/2     | 226  | 1.00000      |
| HL_99779.1  | 4567  | 104996 | 2444  | 50944 | 0.9999  | 0.9066755  | 5/1     | 227  | 1.00000      |
| HL_27271.2  | 22446 | 87117  | 11421 | 41967 | 1.0000  | 0.9467607  | 6/1     | 228  | 1.00000      |
| HL_55272.1  | 2268  | 107295 | 1283  | 52105 | 1.0000  | 0.8584628  | 10/4    | 229  | 1.00000      |
| HL_67000.1  | 6416  | 103147 | 3426  | 49962 | 1.0000  | 0.9071141  | 5/2     | 230  | 1.00000      |
| HL_56824.2  | 11571 | 97992  | 6029  | 47359 | 1.0000  | 0.9275523  | 5/1     | 231  | 1.00000      |
| HL_95720.1  | 1039  | 108524 | 639   | 52749 | 1.0000  | 0.7903445  | 8/3     | 232  | 1.00000      |
| HL_52540.1  | 4722  | 104841 | 2575  | 50813 | 1.0000  | 0.8887819  | 4/2     | 233  | 1.00000      |
| HL_91693.1  | 11115 | 98448  | 5826  | 47562 | 1.0000  | 0.9217078  | 5/1     | 234  | 1.00000      |
| HL_10116.1  | 0     | 109563 | 0     | 53388 | 1.0000  | 0          | 18/5    | 235  | 1.00000      |
| HL_19221.2  | 6314  | 103249 | 3607  | 49781 | 1.0000  | 0.8440003  | 6/2     | 236  | 1.00000      |
| HL_19399.1  | 0     | 109563 | 0     | 53388 | 1.0000  | 0          | 16/2    | 237  | 1.00000      |
| HL_19452.1  | 0     | 109563 | 2     | 53386 | 1.0000  | 0          | 11/3    | 238  | 1.00000      |
| HL_25124.2  | 4382  | 105181 | 2493  | 50895 | 1.0000  | 0.8505381  | 5/2     | 239  | 1.00000      |
| HL_25197.1  | 0     | 109563 | 1     | 53387 | 1.0000  | 0          | 15/4    | 240  | 1.00000      |
| HL_29831.1  | 6972  | 102591 | 3899  | 49489 | 1.0000  | 0.8625975  | 6/2     | 241  | 1.00000      |
| HL_45358.1  | 0     | 109563 | 0     | 53388 | 1.0000  | 0          | 13/2    | 242  | 1.00000      |
| HL_57843.1  | 3467  | 106096 | 1966  | 51422 | 1.0000  | 0.8547237  | 5/2     | 243  | 1.00000      |
| HL_67042.12 | 14496 | 95067  | 7801  | 45587 | 1.0000  | 0.8910694  | 6/2     | 244  | 1.00000      |
| HL_70420.2  | 0     | 109563 | 0     | 53388 | 1.0000  | 0          | 14/8    | 245  | 1.00000      |
| HL_76036.3  | 11702 | 97861  | 6499  | 46889 | 1.0000  | 0.8627389  | 5/1     | 246  | 1.00000      |
| HL_76766.4  | 8628  | 100935 | 4796  | 48592 | 1.0000  | 0.8660805  | 5/2     | 247  | 1.00000      |
| HL_79038.1  | 10292 | 99271  | 5684  | 47704 | 1.0000  | 0.8701258  | 5/1     | 248  | 1.00000      |
| HL_84353.1  | 9138  | 100425 | 5037  | 48351 | 1.0000  | 0.8734671  | 6/2     | 249  | 1.00000      |
| HL_87136.2  | 1242  | 108321 | 821   | 52567 | 1.0000  | 0.7341161  | 8/1     | 250  | 1.00000      |
| HL_90102.1  | 0     | 109563 | 0     | 53388 | 1.0000  | 0          | 19/3    | 251  | 1.00000      |
| HL_97784.1  | 0     | 109563 | 2     | 53386 | 1.0000  | 0          | 15/1    | 252  | 1.00000      |
| HL_97971.1  | 6475  | 103088 | 3721  | 49667 | 1.0000  | 0.8383916  | 6/1     | 253  | 1.00000      |

Table H: Results of Fisher’s exact test according to FET scheme (see Supplementary Material S6) for JAR3D HL module predictions for SISSIz and original data of order R. Brown highlighted rows have a significant p-value after multiple testing correction using the Benjamini-Hochberg procedure at a 5% false discovery rate (adjusted p-value). “Nuc./Bp” denotes the total strand length and the number of base pairs.

| ModelID    | A     | B      | C     | D     | P-value      | Odds ratio | Nuc./Bp | Rank | Adj. p-value         |
|------------|-------|--------|-------|-------|--------------|------------|---------|------|----------------------|
| HL_75759.4 | 5824  | 104977 | 2287  | 51101 | 3.771924e-18 | 1.239581   | 3/1     | 1    | 9.54296772e-16       |
| HL_35865.1 | 5987  | 104814 | 2436  | 50952 | 1.55991e-13  | 1.194715   | 5/1     | 2    | 1.97328615e-11       |
| HL_06643.3 | 5399  | 105402 | 2233  | 51155 | 1.891175e-10 | 1.173429   | 5/2     | 3    | 1.59489091667e-08    |
| HL_87554.1 | 1906  | 108895 | 705   | 52683 | 4.169671e-10 | 1.308007   | 5/1     | 4    | 2.6373169075e-08     |
| HL_42677.2 | 4647  | 106154 | 1935  | 51453 | 1.48667e-08  | 1.164019   | 3/1     | 5    | 7.5225502e-07        |
| HL_74559.1 | 2845  | 107956 | 1138  | 52250 | 2.970469e-08 | 1.209957   | 4/1     | 6    | 1.25254776167e-06    |
| HL_90542.1 | 1016  | 109785 | 358   | 53030 | 9.929761e-08 | 1.370871   | 7/2     | 7    | 3.58889933285714e-06 |
| HL_97499.1 | 2104  | 108697 | 823   | 52565 | 1.183941e-07 | 1.236269   | 4/1     | 8    | 3.7442134125e-06     |
| HL_30008.1 | 2054  | 108747 | 807   | 52581 | 2.835842e-07 | 1.230629   | 5/1     | 9    | 7.97186695555e-06    |
| HL_10378.1 | 1731  | 109070 | 674   | 52714 | 9.084284e-07 | 1.241211   | 4/1     | 10   | 2.298323852e-05      |
| HL_63941.1 | 4471  | 106330 | 1903  | 51485 | 1.717646e-06 | 1.137593   | 4/1     | 11   | 3.9505858e-05        |
| HL_75579.2 | 16365 | 94436  | 7437  | 45951 | 2.927149e-06 | 1.070728   | 3/1     | 12   | 6.17140580833e-05    |
| HL_75850.1 | 4014  | 106787 | 1705  | 51683 | 4.125485e-06 | 1.139406   | 5/1     | 13   | 8.0288285e-05        |
| HL_59604.1 | 2304  | 108497 | 940   | 52448 | 6.254898e-06 | 1.184838   | 3/1     | 14   | 0.00011              |
| HL_74505.1 | 4164  | 106637 | 1779  | 51609 | 7.052144e-06 | 1.132789   | 4/1     | 15   | 0.00012              |
| HL_34027.2 | 7211  | 103590 | 3180  | 50208 | 8.167672e-06 | 1.099075   | 6/1     | 16   | 0.00012              |
| HL_57514.2 | 9424  | 101377 | 4207  | 49181 | 8.206241e-06 | 1.086736   | 4/1     | 17   | 0.00012              |
| HL_05361.1 | 566   | 110235 | 192   | 53196 | 9.273833e-06 | 1.422578   | 6/2     | 18   | 0.00013              |
| HL_65071.1 | 975   | 109826 | 366   | 53022 | 1.8207e-05   | 1.286049   | 4/1     | 19   | 0.00024              |
| HL_86115.1 | 4160  | 106641 | 1795  | 51593 | 3.270497e-05 | 1.121225   | 4/2     | 20   | 0.00041              |
| HL_42077.2 | 15215 | 95586  | 6949  | 46439 | 3.471757e-05 | 1.063753   | 5/2     | 21   | 0.00042              |
| HL_03785.1 | 3876  | 106925 | 1675  | 51713 | 7.347684e-05 | 1.119146   | 5/1     | 22   | 0.00084              |
| HL_17790.1 | 2200  | 108601 | 916   | 52472 | 8.366967e-05 | 1.160422   | 3/1     | 23   | 0.00092              |
| HL_99207.1 | 1852  | 108949 | 764   | 52624 | 0.0001       | 1.170854   | 7/3     | 24   | 0.00136              |
| HL_59225.1 | 1998  | 108803 | 838   | 52550 | 0.0003       | 1.15154    | 5/1     | 25   | 0.00331              |
| HL_48039.2 | 18707 | 92094  | 8664  | 44724 | 0.0004       | 1.048569   | 4/1     | 26   | 0.00416              |
| HL_48116.2 | 8869  | 101932 | 4028  | 49360 | 0.0006       | 1.066232   | 6/1     | 27   | 0.00555              |
| HL_19905.3 | 8091  | 102710 | 3670  | 49718 | 0.0008       | 1.067183   | 4/1     | 28   | 0.00738              |
| HL_26579.1 | 682   | 110119 | 262   | 53126 | 0.0009       | 1.255784   | 5/2     | 29   | 0.00748              |
| HL_00721.1 | 1336  | 109465 | 552   | 52836 | 0.0011       | 1.168199   | 2/1     | 30   | 0.00936              |
| HL_35619.2 | 1475  | 109326 | 615   | 52773 | 0.0012       | 1.157713   | 5/2     | 31   | 0.00982              |
| HL_17723.4 | 1761  | 109040 | 745   | 52643 | 0.0013       | 1.141181   | 7/1     | 32   | 0.01065              |
| HL_01418.1 | 1593  | 109208 | 671   | 52717 | 0.0016       | 1.146003   | 5/1     | 33   | 0.01250              |
| HL_68435.1 | 852   | 109949 | 343   | 53045 | 0.0024       | 1.198371   | 7/2     | 34   | 0.01747              |
| HL_99584.1 | 1345  | 109456 | 563   | 52825 | 0.0024       | 1.152948   | 4/1     | 35   | 0.01747              |
| HL_45018.3 | 874   | 109927 | 358   | 53030 | 0.0048       | 1.177714   | 10/4    | 36   | 0.03360              |
| HL_34108.2 | 9796  | 101005 | 4515  | 48873 | 0.0049       | 1.049829   | 4/1     | 37   | 0.03372              |
| HL_98523.2 | 4991  | 105810 | 2257  | 51131 | 0.0053       | 1.0686     | 6/1     | 38   | 0.03547              |
| HL_21675.3 | 7572  | 103229 | 3470  | 49918 | 0.0057       | 1.055208   | 5/2     | 39   | 0.03713              |
| HL_95716.1 | 5951  | 104850 | 2711  | 50677 | 0.0065       | 1.060973   | 5/1     | 40   | 0.04129              |
| HL_18587.1 | 842   | 109959 | 348   | 53040 | 0.0081       | 1.16708    | 8/2     | 41   | 0.04981              |
| HL_73465.1 | 28    | 110773 | 4     | 53384 | 0.0090       | 3.373325   | 11/2    | 42   | 0.05338              |
| HL_00090.1 | 757   | 110044 | 311   | 53077 | 0.0091       | 1.174005   | 11/1    | 43   | 0.05338              |
| HL_24707.1 | 1714  | 109087 | 748   | 52640 | 0.0117       | 1.105733   | 4/2     | 44   | 0.06728              |
| HL_72273.1 | 753   | 110048 | 312   | 53076 | 0.0127       | 1.163997   | 6/2     | 45   | 0.07061              |
| HL_11376.1 | 24714 | 86087  | 11647 | 41741 | 0.0128       | 1.028858   | 5/1     | 46   | 0.07061              |
| HL_46489.2 | 951   | 109850 | 403   | 52985 | 0.0156       | 1.138217   | 9/2     | 47   | 0.08393              |
| HL_50312.1 | 4368  | 106433 | 1991  | 51397 | 0.0185       | 1.059434   | 6/1     | 48   | 0.09752              |
| HL_33277.1 | 1597  | 109204 | 701   | 52687 | 0.0197       | 1.099133   | 7/1     | 49   | 0.10196              |
| HL_98833.3 | 746   | 110055 | 317   | 53071 | 0.0315       | 1.134812   | 8/2     | 50   | 0.15958              |

Continued on next page

Table H – continued from previous page

| ModelID    | A     | B      | C     | D     | P-value | Odds ratio | Nuc./Bp | Rank | Adj. p-value |
|------------|-------|--------|-------|-------|---------|------------|---------|------|--------------|
| HL_24711.1 | 732   | 110069 | 311   | 53077 | 0.0327  | 1.134982   | 7/2     | 51   | 0.16077      |
| HL_58601.1 | 3804  | 106997 | 1739  | 51649 | 0.0330  | 1.055923   | 5/2     | 52   | 0.16077      |
| HL_44467.1 | 41    | 110760 | 11    | 53377 | 0.0509  | 1.796226   | 8/1     | 53   | 0.24304      |
| HL_78420.1 | 552   | 110249 | 234   | 53154 | 0.0530  | 1.137317   | 9/1     | 54   | 0.24842      |
| HL_30731.1 | 1627  | 109174 | 730   | 52658 | 0.0554  | 1.075001   | 4/1     | 55   | 0.25308      |
| HL_41827.1 | 1133  | 109668 | 501   | 52887 | 0.0562  | 1.090586   | 7/2     | 56   | 0.25308      |
| HL_36842.1 | 1999  | 108802 | 904   | 52484 | 0.0570  | 1.066679   | 8/2     | 57   | 0.25308      |
| HL_53789.1 | 2136  | 108665 | 970   | 52418 | 0.0632  | 1.062233   | 6/1     | 58   | 0.27556      |
| HL_73972.1 | 955   | 109846 | 421   | 52967 | 0.0665  | 1.093808   | 6/3     | 59   | 0.28512      |
| HL_78507.1 | 2128  | 108673 | 968   | 52420 | 0.0691  | 1.060403   | 5/1     | 60   | 0.29149      |
| HL_42345.1 | 1095  | 109706 | 487   | 52901 | 0.0729  | 1.084221   | 7/1     | 61   | 0.30228      |
| HL_27397.1 | 374   | 110427 | 157   | 53231 | 0.0789  | 1.148306   | 7/2     | 62   | 0.31490      |
| HL_30128.1 | 928   | 109873 | 411   | 52977 | 0.0803  | 1.088683   | 9/2     | 63   | 0.31490      |
| HL_56809.1 | 90    | 110711 | 32    | 53356 | 0.0810  | 1.355489   | 4/1     | 64   | 0.31490      |
| HL_48254.1 | 1388  | 109413 | 625   | 52763 | 0.0817  | 1.07095    | 9/2     | 65   | 0.31490      |
| HL_78361.1 | 641   | 110160 | 279   | 53109 | 0.0821  | 1.107634   | 8/2     | 66   | 0.31490      |
| HL_38138.1 | 831   | 109970 | 367   | 53021 | 0.0857  | 1.09171    | 6/1     | 67   | 0.32357      |
| HL_66877.1 | 166   | 110635 | 65    | 53323 | 0.0871  | 1.230854   | 11/4    | 68   | 0.32421      |
| HL_82538.1 | 21968 | 88833  | 10437 | 42951 | 0.0941  | 1.017687   | 5/1     | 69   | 0.34518      |
| HL_97270.3 | 2756  | 108045 | 1271  | 52117 | 0.0980  | 1.045943   | 7/2     | 70   | 0.35416      |
| HL_05113.1 | 88    | 110713 | 32    | 53356 | 0.1004  | 1.325353   | 7/1     | 71   | 0.35792      |
| HL_23182.1 | 1185  | 109616 | 534   | 52854 | 0.1025  | 1.069992   | 8/2     | 72   | 0.36010      |
| HL_62967.1 | 9659  | 101142 | 4554  | 48834 | 0.1045  | 1.024071   | 5/3     | 73   | 0.36219      |
| HL_84888.1 | 462   | 110339 | 200   | 53188 | 0.1094  | 1.113511   | 9/3     | 74   | 0.37420      |
| HL_91872.1 | 471   | 110330 | 205   | 53183 | 0.1191  | 1.107502   | 9/3     | 75   | 0.40191      |
| HL_44522.1 | 169   | 110632 | 69    | 53319 | 0.1369  | 1.180411   | 5/2     | 76   | 0.45589      |
| HL_93567.1 | 1808  | 108993 | 833   | 52555 | 0.1451  | 1.046571   | 7/1     | 77   | 0.47310      |
| HL_55202.1 | 14    | 110787 | 3     | 53385 | 0.1459  | 2.248719   | 13/2    | 78   | 0.47310      |
| HL_93530.1 | 1035  | 109766 | 470   | 52918 | 0.1484  | 1.061641   | 7/1     | 79   | 0.47457      |
| HL_52116.1 | 765   | 110036 | 344   | 53044 | 0.1501  | 1.072022   | 7/2     | 80   | 0.47457      |
| HL_55718.1 | 8396  | 102405 | 3973  | 49415 | 0.1669  | 1.019745   | 3/1     | 81   | 0.51589      |
| HL_65249.1 | 8900  | 101901 | 4214  | 49174 | 0.1672  | 1.019184   | 6/2     | 82   | 0.51589      |
| HL_66174.1 | 998   | 109803 | 455   | 52933 | 0.1701  | 1.05738    | 9/4     | 83   | 0.51849      |
| HL_83865.1 | 5466  | 105335 | 2576  | 50812 | 0.1740  | 1.02357    | 6/1     | 84   | 0.52408      |
| HL_53015.1 | 553   | 110248 | 248   | 53140 | 0.1832  | 1.07479    | 8/3     | 85   | 0.54538      |
| HL_08203.1 | 56    | 110745 | 21    | 53367 | 0.1957  | 1.284995   | 9/4     | 86   | 0.56254      |
| HL_57923.1 | 251   | 110550 | 109   | 53279 | 0.1978  | 1.109795   | 7/2     | 87   | 0.56254      |
| HL_33875.1 | 683   | 110118 | 310   | 53078 | 0.2003  | 1.061976   | 11/3    | 88   | 0.56254      |
| HL_82294.3 | 3028  | 107773 | 1420  | 51968 | 0.2012  | 1.028238   | 7/2     | 89   | 0.56254      |
| HL_12706.1 | 1667  | 109134 | 774   | 52614 | 0.2016  | 1.038316   | 4/2     | 90   | 0.56254      |
| HL_90579.3 | 445   | 110356 | 199   | 53189 | 0.2023  | 1.077785   | 10/2    | 91   | 0.56254      |
| HL_24473.3 | 4     | 110797 | 0     | 53388 | 0.2074  | Inf        | 13/4    | 92   | 0.56804      |
| HL_33451.1 | 7     | 110794 | 1     | 53387 | 0.2088  | 3.372874   | 11/1    | 93   | 0.56804      |
| HL_66880.1 | 64    | 110737 | 25    | 53363 | 0.2198  | 1.233608   | 11/1    | 94   | 0.59149      |
| HL_17008.1 | 29    | 110772 | 10    | 53378 | 0.2309  | 1.39745    | 10/2    | 95   | 0.61487      |
| HL_18156.2 | 257   | 110544 | 114   | 53274 | 0.2491  | 1.086444   | 7/2     | 96   | 0.65559      |
| HL_20028.1 | 168   | 110633 | 73    | 53315 | 0.2531  | 1.109046   | 8/1     | 97   | 0.65559      |
| HL_63304.1 | 14    | 110787 | 4     | 53384 | 0.2539  | 1.68651    | 15/1    | 98   | 0.65559      |
| HL_74686.1 | 255   | 110546 | 114   | 53274 | 0.2722  | 1.07797    | 10/2    | 99   | 0.69572      |
| HL_13707.2 | 70    | 110731 | 29    | 53359 | 0.2847  | 1.163145   | 8/3     | 100  | 0.71353      |
| HL_74465.5 | 884   | 109917 | 411   | 52977 | 0.2848  | 1.036632   | 9/1     | 101  | 0.71353      |
| HL_42094.1 | 639   | 110162 | 296   | 53092 | 0.3001  | 1.040403   | 5/2     | 102  | 0.74447      |
| HL_68081.3 | 1562  | 109239 | 736   | 52652 | 0.3160  | 1.022935   | 8/2     | 103  | 0.76771      |
| HL_62970.1 | 245   | 110556 | 111   | 53277 | 0.3166  | 1.063653   | 13/4    | 104  | 0.76771      |
| HL_25175.1 | 8     | 110793 | 2     | 53386 | 0.3186  | 1.927407   | 16/4    | 105  | 0.76771      |
| HL_33640.1 | 617   | 110184 | 287   | 53101 | 0.3243  | 1.036044   | 8/1     | 106  | 0.77406      |
| HL_78731.1 | 863   | 109938 | 405   | 52983 | 0.3421  | 1.026963   | 9/1     | 107  | 0.80896      |
| HL_65347.1 | 526   | 110275 | 245   | 53143 | 0.3457  | 1.034613   | 10/3    | 108  | 0.80985      |
| HL_66948.1 | 499   | 110302 | 233   | 53155 | 0.3619  | 1.03203    | 7/2     | 109  | 0.83508      |

Continued on next page

Table H – continued from previous page

| ModelID    | A     | B      | C     | D     | P-value | Odds ratio | Nuc./Bp | Rank | Adj. p-value |
|------------|-------|--------|-------|-------|---------|------------|---------|------|--------------|
| HL_82288.1 | 583   | 110218 | 273   | 53115 | 0.3631  | 1.029159   | 6/1     | 110  | 0.83508      |
| HL_23195.1 | 5     | 110796 | 1     | 53387 | 0.3675  | 2.409236   | 17/3    | 111  | 0.83763      |
| HL_44390.1 | 14    | 110787 | 5     | 53383 | 0.3805  | 1.349223   | 11/3    | 112  | 0.85296      |
| HL_93771.1 | 2825  | 107976 | 1347  | 52041 | 0.3813  | 1.010809   | 6/1     | 113  | 0.85296      |
| HL_15603.2 | 81    | 110720 | 36    | 53352 | 0.3843  | 1.084192   | 12/1    | 114  | 0.85296      |
| HL_11547.2 | 312   | 110489 | 146   | 53242 | 0.4065  | 1.029792   | 8/1     | 115  | 0.89423      |
| HL_87223.1 | 137   | 110664 | 63    | 53325 | 0.4118  | 1.047862   | 7/1     | 116  | 0.89807      |
| HL_27429.3 | 221   | 110580 | 103   | 53285 | 0.4156  | 1.033885   | 9/1     | 117  | 0.89859      |
| HL_94578.1 | 373   | 110428 | 176   | 53212 | 0.4291  | 1.021252   | 6/3     | 118  | 0.92003      |
| HL_57217.1 | 437   | 110364 | 207   | 53181 | 0.4381  | 1.017289   | 8/2     | 119  | 0.92758      |
| HL_96915.1 | 608   | 110193 | 289   | 53099 | 0.4400  | 1.013773   | 9/2     | 120  | 0.92758      |
| HL_13786.1 | 2764  | 108037 | 1325  | 52063 | 0.4458  | 1.005261   | 5/1     | 121  | 0.93209      |
| HL_42436.1 | 2     | 110799 | 0     | 53388 | 0.4554  | Inf        | 15/3    | 122  | 0.94441      |
| HL_28676.1 | 1341  | 109460 | 643   | 52745 | 0.4699  | 1.004949   | 6/1     | 123  | 0.95848      |
| HL_21545.1 | 2199  | 108602 | 1056  | 52332 | 0.4722  | 1.003439   | 6/1     | 124  | 0.95848      |
| HL_72543.2 | 313   | 110488 | 149   | 53239 | 0.4736  | 1.01222    | 10/3    | 125  | 0.95848      |
| HL_42969.1 | 25    | 110776 | 11    | 53377 | 0.4792  | 1.095102   | 10/1    | 126  | 0.96224      |
| HL_20920.1 | 8     | 110793 | 3     | 53385 | 0.4961  | 1.284872   | 11/3    | 127  | 0.98823      |
| HL_62880.1 | 3033  | 107768 | 1461  | 51927 | 0.5036  | 1.000272   | 6/1     | 128  | 0.99535      |
| HL_01926.3 | 1081  | 109720 | 521   | 52867 | 0.5138  | 0.9997379  | 8/3     | 129  | 1.00000      |
| HL_24544.2 | 2152  | 108649 | 1039  | 52349 | 0.5299  | 0.9979514  | 8/3     | 130  | 1.00000      |
| HL_68697.2 | 12432 | 98369  | 5997  | 47391 | 0.5342  | 0.9987218  | 6/1     | 131  | 1.00000      |
| HL_93263.1 | 331   | 110470 | 161   | 53227 | 0.5604  | 0.9905804  | 2/1     | 132  | 1.00000      |
| HL_88960.1 | 414   | 110387 | 202   | 53186 | 0.5771  | 0.9874749  | 8/2     | 133  | 1.00000      |
| HL_67761.1 | 4210  | 106591 | 2039  | 51349 | 0.5830  | 0.9946629  | 6/1     | 134  | 1.00000      |
| HL_50059.1 | 639   | 110162 | 312   | 53076 | 0.5913  | 0.9867566  | 7/4     | 135  | 1.00000      |
| HL_19226.1 | 522   | 110279 | 256   | 53132 | 0.6081  | 0.9824022  | 5/1     | 136  | 1.00000      |
| HL_76679.1 | 3619  | 107182 | 1758  | 51630 | 0.6181  | 0.9916284  | 5/2     | 137  | 1.00000      |
| HL_86398.1 | 84    | 110717 | 42    | 53346 | 0.6183  | 0.9636644  | 11/3    | 138  | 1.00000      |
| HL_11509.2 | 414   | 110387 | 204   | 53184 | 0.6217  | 0.9777458  | 10/3    | 139  | 1.00000      |
| HL_38897.1 | 118   | 110683 | 59    | 53329 | 0.6258  | 0.9636532  | 7/1     | 140  | 1.00000      |
| HL_85534.1 | 342   | 110459 | 169   | 53219 | 0.6259  | 0.9749803  | 7/3     | 141  | 1.00000      |
| HL_76585.1 | 470   | 110331 | 232   | 53156 | 0.6354  | 0.9760143  | 9/2     | 142  | 1.00000      |
| HL_46175.2 | 490   | 110311 | 242   | 53146 | 0.6400  | 0.9754919  | 10/2    | 143  | 1.00000      |
| HL_87844.2 | 2401  | 108400 | 1172  | 52216 | 0.6510  | 0.9868163  | 6/2     | 144  | 1.00000      |
| HL_79902.1 | 197   | 110604 | 99    | 53289 | 0.6590  | 0.9587398  | 8/3     | 145  | 1.00000      |
| HL_85044.1 | 21    | 110780 | 11    | 53377 | 0.6667  | 0.9198577  | 11/2    | 146  | 1.00000      |
| HL_20806.1 | 1     | 110800 | 0     | 53388 | 0.6748  | Inf        | 11/2    | 147  | 1.00000      |
| HL_98577.1 | 1     | 110800 | 0     | 53388 | 0.6748  | Inf        | 13/2    | 148  | 1.00000      |
| HL_06997.2 | 15    | 110786 | 8     | 53380 | 0.6823  | 0.9034351  | 12/2    | 149  | 1.00000      |
| HL_46570.1 | 957   | 109844 | 473   | 52915 | 0.6863  | 0.9746392  | 8/1     | 150  | 1.00000      |
| HL_24108.1 | 67    | 110734 | 35    | 53353 | 0.6923  | 0.9223288  | 8/2     | 151  | 1.00000      |
| HL_29196.1 | 588   | 110213 | 293   | 53095 | 0.6950  | 0.9668116  | 6/1     | 152  | 1.00000      |
| HL_68733.1 | 196   | 110605 | 100   | 53288 | 0.7030  | 0.9443027  | 8/1     | 153  | 1.00000      |
| HL_95049.1 | 699   | 110102 | 348   | 53040 | 0.7040  | 0.9676502  | 8/1     | 154  | 1.00000      |
| HL_60200.1 | 1102  | 109699 | 546   | 52842 | 0.7136  | 0.972197   | 8/2     | 155  | 1.00000      |
| HL_94697.1 | 139   | 110662 | 72    | 53316 | 0.7183  | 0.930127   | 11/2    | 156  | 1.00000      |
| HL_39895.6 | 5538  | 105263 | 2704  | 50684 | 0.7232  | 0.9861402  | 5/2     | 157  | 1.00000      |
| HL_32644.2 | 349   | 110452 | 177   | 53211 | 0.7278  | 0.9499055  | 10/3    | 158  | 1.00000      |
| HL_80459.3 | 15181 | 95620  | 7373  | 46015 | 0.7289  | 0.990845   | 5/1     | 159  | 1.00000      |
| HL_17537.1 | 178   | 110623 | 92    | 53296 | 0.7312  | 0.9321422  | 8/1     | 160  | 1.00000      |
| HL_19528.1 | 518   | 110283 | 261   | 53127 | 0.7361  | 0.9560845  | 9/3     | 161  | 1.00000      |
| HL_49036.3 | 24585 | 86216  | 11922 | 41466 | 0.7443  | 0.991801   | 6/2     | 162  | 1.00000      |
| HL_59182.1 | 2     | 110799 | 1     | 53387 | 0.7516  | 0.9636914  | 15/2    | 163  | 1.00000      |
| HL_58083.2 | 262   | 110539 | 135   | 53253 | 0.7552  | 0.9349682  | 9/2     | 164  | 1.00000      |
| HL_07915.1 | 567   | 110234 | 287   | 53101 | 0.7644  | 0.951675   | 6/1     | 165  | 1.00000      |
| HL_54751.2 | 60    | 110741 | 33    | 53355 | 0.7666  | 0.8760075  | 11/2    | 166  | 1.00000      |
| HL_26495.1 | 371   | 110430 | 190   | 53198 | 0.7680  | 0.9406523  | 8/1     | 167  | 1.00000      |
| HL_23129.1 | 52    | 110749 | 29    | 53359 | 0.7752  | 0.863929   | 9/2     | 168  | 1.00000      |

Continued on next page

Table H – continued from previous page

| ModelID     | A     | B      | C     | D     | P-value | Odds ratio | Nuc./Bp | Rank | Adj. p-value |
|-------------|-------|--------|-------|-------|---------|------------|---------|------|--------------|
| HL_08382.2  | 15785 | 95016  | 7681  | 45707 | 0.7799  | 0.9885783  | 6/1     | 169  | 1.00000      |
| HL_58223.1  | 168   | 110633 | 89    | 53299 | 0.7863  | 0.9094009  | 5/1     | 170  | 1.00000      |
| HL_84289.1  | 29    | 110772 | 17    | 53371 | 0.7901  | 0.8219281  | 11/2    | 171  | 1.00000      |
| HL_96994.1  | 11    | 110790 | 7     | 53381 | 0.7989  | 0.7571199  | 11/1    | 172  | 1.00000      |
| HL_04194.1  | 327   | 110474 | 170   | 53218 | 0.8036  | 0.9266128  | 7/3     | 173  | 1.00000      |
| HL_61547.5  | 17030 | 93771  | 8292  | 45096 | 0.8043  | 0.9876949  | 6/1     | 174  | 1.00000      |
| HL_39486.1  | 4220  | 106581 | 2079  | 51309 | 0.8048  | 0.9771567  | 7/1     | 175  | 1.00000      |
| HL_85018.1  | 83    | 110718 | 47    | 53341 | 0.8365  | 0.8508035  | 10/1    | 176  | 1.00000      |
| HL_35200.1  | 1606  | 109195 | 808   | 52580 | 0.8488  | 0.9570911  | 6/1     | 177  | 1.00000      |
| HL_72498.12 | 802   | 109999 | 411   | 52977 | 0.8532  | 0.9397921  | 7/2     | 178  | 1.00000      |
| HL_64371.2  | 28    | 110773 | 18    | 53370 | 0.8669  | 0.7494343  | 12/2    | 179  | 1.00000      |
| HL_62881.1  | 497   | 110304 | 260   | 53128 | 0.8676  | 0.9206965  | 10/4    | 180  | 1.00000      |
| HL_23290.1  | 1164  | 109637 | 594   | 52794 | 0.8789  | 0.9436142  | 7/1     | 181  | 1.00000      |
| HL_88311.2  | 548   | 110253 | 287   | 53101 | 0.8815  | 0.9196281  | 7/3     | 182  | 1.00000      |
| HL_77692.1  | 601   | 110200 | 314   | 53074 | 0.8849  | 0.9218202  | 10/4    | 183  | 1.00000      |
| HL_47784.2  | 625   | 110176 | 327   | 53061 | 0.8931  | 0.920496   | 11/2    | 184  | 1.00000      |
| HL_45411.1  | 678   | 110123 | 354   | 53034 | 0.8962  | 0.9223674  | 8/2     | 185  | 1.00000      |
| HL_38898.1  | 341   | 110460 | 184   | 53204 | 0.9004  | 0.8926443  | 8/1     | 186  | 1.00000      |
| HL_18781.4  | 1911  | 108890 | 969   | 52419 | 0.9073  | 0.9493756  | 8/2     | 187  | 1.00000      |
| HL_25195.1  | 3     | 110798 | 3     | 53385 | 0.9077  | 0.4818127  | 12/2    | 188  | 1.00000      |
| HL_91226.3  | 1411  | 109390 | 722   | 52666 | 0.9105  | 0.9408992  | 8/1     | 189  | 1.00000      |
| HL_84768.1  | 513   | 110288 | 274   | 53114 | 0.9214  | 0.9016742  | 4/1     | 190  | 1.00000      |
| HL_33402.3  | 1622  | 109179 | 830   | 52558 | 0.9250  | 0.9407475  | 7/2     | 191  | 1.00000      |
| HL_82243.1  | 1192  | 109609 | 616   | 52772 | 0.9252  | 0.931652   | 9/1     | 192  | 1.00000      |
| HL_30366.1  | 258   | 110543 | 144   | 53244 | 0.9283  | 0.8629817  | 11/5    | 193  | 1.00000      |
| HL_69403.1  | 177   | 110624 | 102   | 53286 | 0.9330  | 0.8358812  | 9/3     | 194  | 1.00000      |
| HL_91613.1  | 12    | 110789 | 10    | 53378 | 0.9330  | 0.5781475  | 10/3    | 195  | 1.00000      |
| HL_80492.2  | 65    | 110736 | 42    | 53346 | 0.9424  | 0.7455251  | 8/4     | 196  | 1.00000      |
| HL_66467.1  | 2388  | 108413 | 1215  | 52173 | 0.9426  | 0.9458515  | 5/1     | 197  | 1.00000      |
| HL_70912.1  | 588   | 110213 | 316   | 53072 | 0.9452  | 0.8960357  | 7/1     | 198  | 1.00000      |
| HL_47337.1  | 4794  | 106007 | 2402  | 50986 | 0.9463  | 0.959945   | 5/1     | 199  | 1.00000      |
| HL_42553.1  | 14    | 110787 | 12    | 53376 | 0.9517  | 0.5620746  | 10/3    | 200  | 1.00000      |
| HL_39872.2  | 644   | 110157 | 347   | 53041 | 0.9565  | 0.8936317  | 8/2     | 201  | 1.00000      |
| HL_56775.1  | 608   | 110193 | 329   | 53059 | 0.9581  | 0.8898474  | 7/2     | 202  | 1.00000      |
| HL_65924.1  | 2     | 110799 | 3     | 53385 | 0.9586  | 0.3212147  | 14/4    | 203  | 1.00000      |
| HL_65802.1  | 249   | 110552 | 144   | 53244 | 0.9632  | 0.8328159  | 11/3    | 204  | 1.00000      |
| HL_19132.1  | 315   | 110486 | 181   | 53207 | 0.9730  | 0.8381099  | 8/3     | 205  | 1.00000      |
| HL_16770.1  | 163   | 110638 | 101   | 53287 | 0.9792  | 0.7773183  | 10/2    | 206  | 1.00000      |
| HL_39942.2  | 885   | 109916 | 478   | 52910 | 0.9793  | 0.8912406  | 7/1     | 207  | 1.00000      |
| HL_78228.1  | 678   | 110123 | 372   | 53016 | 0.9795  | 0.8774439  | 12/2    | 208  | 1.00000      |
| HL_49492.1  | 3     | 110798 | 5     | 53383 | 0.9827  | 0.2890809  | 14/4    | 209  | 1.00000      |
| HL_38130.2  | 24    | 110777 | 21    | 53367 | 0.9836  | 0.5505469  | 11/1    | 210  | 1.00000      |
| HL_27271.2  | 23190 | 87611  | 11421 | 41967 | 0.9846  | 0.9726052  | 6/1     | 211  | 1.00000      |
| HL_62228.3  | 6805  | 103996 | 3427  | 49961 | 0.9856  | 0.9539571  | 6/2     | 212  | 1.00000      |
| HL_39422.1  | 546   | 110255 | 308   | 53080 | 0.9875  | 0.8534545  | 7/1     | 213  | 1.00000      |
| HL_60203.1  | 161   | 110640 | 103   | 53285 | 0.9891  | 0.7527761  | 5/2     | 214  | 1.00000      |
| HL_52574.3  | 4502  | 106299 | 2298  | 51090 | 0.9894  | 0.941592   | 7/1     | 215  | 1.00000      |
| HL_86123.2  | 950   | 109851 | 519   | 52869 | 0.9900  | 0.8809612  | 10/2    | 216  | 1.00000      |
| HL_41833.2  | 51    | 110750 | 40    | 53348 | 0.9916  | 0.6141556  | 11/4    | 217  | 1.00000      |
| HL_64543.2  | 1479  | 109322 | 793   | 52595 | 0.9930  | 0.8972929  | 9/2     | 218  | 1.00000      |
| HL_48480.1  | 646   | 110155 | 365   | 53023 | 0.9930  | 0.8519335  | 7/1     | 219  | 1.00000      |
| HL_34440.1  | 2140  | 108661 | 1130  | 52258 | 0.9942  | 0.9107854  | 6/1     | 220  | 1.00000      |
| HL_56824.2  | 12033 | 98768  | 6029  | 47359 | 0.9957  | 0.9570127  | 5/1     | 221  | 1.00000      |
| HL_59610.1  | 1691  | 109110 | 916   | 52472 | 0.9980  | 0.8877979  | 5/1     | 222  | 1.00000      |
| HL_91693.1  | 11568 | 99233  | 5826  | 47562 | 0.9982  | 0.9516826  | 5/1     | 223  | 1.00000      |
| HL_06122.1  | 1651  | 109150 | 897   | 52491 | 0.9983  | 0.885154   | 7/3     | 224  | 1.00000      |
| HL_37962.1  | 245   | 110556 | 159   | 53229 | 0.9984  | 0.7418576  | 8/2     | 225  | 1.00000      |
| HL_99633.1  | 528   | 110273 | 314   | 53074 | 0.9985  | 0.8093343  | 8/3     | 226  | 1.00000      |
| HL_67000.1  | 6682  | 104119 | 3426  | 49962 | 0.9989  | 0.9359004  | 5/2     | 227  | 1.00000      |

Continued on next page

Table H – continued from previous page

| ModelID     | A     | B      | C    | D     | P-value | Odds ratio | Nuc./Bp | Rank | Adj. p-value |
|-------------|-------|--------|------|-------|---------|------------|---------|------|--------------|
| HL_68579.1  | 352   | 110449 | 221  | 53167 | 0.9990  | 0.76674    | 6/2     | 228  | 1.00000      |
| HL_99779.1  | 4696  | 106105 | 2444 | 50944 | 0.9992  | 0.92254    | 5/1     | 229  | 1.00000      |
| HL_49210.1  | 718   | 110083 | 420  | 52968 | 0.9992  | 0.8225793  | 7/2     | 230  | 1.00000      |
| HL_98233.1  | 86    | 110715 | 69   | 53319 | 0.9993  | 0.6002307  | 8/1     | 231  | 1.00000      |
| HL_52540.1  | 4940  | 105861 | 2575 | 50813 | 0.9995  | 0.9208518  | 4/2     | 232  | 1.00000      |
| HL_55272.1  | 2293  | 108508 | 1283 | 52105 | 1.0000  | 0.8582234  | 10/4    | 233  | 1.00000      |
| HL_95720.1  | 1061  | 109740 | 639  | 52749 | 1.0000  | 0.798135   | 8/3     | 234  | 1.00000      |
| HL_57843.1  | 3564  | 107237 | 1966 | 51422 | 1.0000  | 0.8692862  | 5/2     | 235  | 1.00000      |
| HL_25124.2  | 4552  | 106249 | 2493 | 50895 | 1.0000  | 0.8746496  | 5/2     | 236  | 1.00000      |
| HL_10116.1  | 0     | 110801 | 0    | 53388 | 1.0000  | 0          | 18/5    | 237  | 1.00000      |
| HL_19221.2  | 6554  | 104247 | 3607 | 49781 | 1.0000  | 0.8676902  | 6/2     | 238  | 1.00000      |
| HL_19399.1  | 0     | 110801 | 0    | 53388 | 1.0000  | 0          | 16/2    | 239  | 1.00000      |
| HL_19452.1  | 0     | 110801 | 2    | 53386 | 1.0000  | 0          | 11/3    | 240  | 1.00000      |
| HL_25197.1  | 0     | 110801 | 1    | 53387 | 1.0000  | 0          | 15/4    | 241  | 1.00000      |
| HL_29831.1  | 7235  | 103566 | 3899 | 49489 | 1.0000  | 0.8867061  | 6/2     | 242  | 1.00000      |
| HL_45358.1  | 0     | 110801 | 0    | 53388 | 1.0000  | 0          | 13/2    | 243  | 1.00000      |
| HL_67042.12 | 15031 | 95770  | 7801 | 45587 | 1.0000  | 0.9171711  | 6/2     | 244  | 1.00000      |
| HL_70420.2  | 0     | 110801 | 0    | 53388 | 1.0000  | 0          | 14/8    | 245  | 1.00000      |
| HL_76036.3  | 12176 | 98625  | 6499 | 46889 | 1.0000  | 0.890727   | 5/1     | 246  | 1.00000      |
| HL_76766.4  | 8971  | 101830 | 4796 | 48592 | 1.0000  | 0.8925925  | 5/2     | 247  | 1.00000      |
| HL_79038.1  | 10721 | 100080 | 5684 | 47704 | 1.0000  | 0.8990645  | 5/1     | 248  | 1.00000      |
| HL_84353.1  | 9487  | 101314 | 5037 | 48351 | 1.0000  | 0.8988663  | 6/2     | 249  | 1.00000      |
| HL_87136.2  | 1265  | 109536 | 821  | 52567 | 1.0000  | 0.7394172  | 8/1     | 250  | 1.00000      |
| HL_90102.1  | 0     | 110801 | 0    | 53388 | 1.0000  | 0          | 19/3    | 251  | 1.00000      |
| HL_97784.1  | 0     | 110801 | 2    | 53386 | 1.0000  | 0          | 15/1    | 252  | 1.00000      |
| HL_97971.1  | 6747  | 104054 | 3721 | 49667 | 1.0000  | 0.8654953  | 6/1     | 253  | 1.00000      |

Table I: Results of Fisher’s exact test according to the FET scheme (see Supplementary Material S6) for JAR3D HL module predictions of all JAR3D HL models with mean interior edit distance  $\leq 4$  and passed cutoff  $\geq 50$ .

| Order | Model | A     | B     | C     | D    | P-value      | Odds ratio |
|-------|-------|-------|-------|-------|------|--------------|------------|
| H     | all   | 94208 | 17852 | 44755 | 8633 | 0.108449     | 1.017947   |
| L     | all   | 92134 | 17429 | 44755 | 8633 | 0.08859385   | 1.0197     |
| R     | all   | 93603 | 17198 | 44755 | 8633 | 0.0003771921 | 1.049861   |
