# Supplementary material for: RNA 3D Modules in Genome-Wide Predictions of RNA 2D Structure
Source: PubMed Central journal article supplement (PMC4624896; doi:10.1371/journal.pone.0139900), 2015-10-28
Supplement: pone.0139900.s008.pdf [file pone.0139900.s008.pdf]

# Supplementary Information 4

## False discovery rates of alternative approaches L and R.

Table A: False discovery rates (FDR) for individual  $mRm_{IL}$  models with mean  $RM_{Detect}$  score  $\geq Q_{0.75}$  in windows with p-score  $> 0.9$  and  $0.25 \leq GC$  content  $\leq 0.75$  of order L. Status “+” denotes models with adjusted p-value  $\leq 0.05$  and odds ratio  $\geq 1.0$  whereas “\*” denotes models with odds ratio  $\geq 1.0$ . Models assigned with “-” are neither enriched nor occur at higher rates in the original data. Colored rows have an  $FDR \leq \hat{F}_{rnaz}$  and original window count  $\geq 6$ . The table is sorted in ascending order according to FDR.

| p-score > 0.9, 0.25 ≤ GC content ≤ 0.75 |            |            |         |            |       |  |
|-----------------------------------------|------------|------------|---------|------------|-------|--|
| ModelID                                 | # original | # shuffled | FDR (%) | Odds ratio | Stat. |  |
| $\hat{F}_{rnaz}$                        | 142 490    | 66 891     | 46.9%   |            |       |  |
| RF00011_1583_1NBS_177_190_209_219       | 0          | 0          | 0.000   | 0.000      | -     |  |
| RF00177_1133_2VHO_380_389_400_408       | 1          | 0          | 0.000   | Inf        | *     |  |
| RF00177_698_2B64_481_491_518_522        | 1          | 0          | 0.000   | Inf        | *     |  |
| RF01118_270_2QBC_13_17_35_55            | 0          | 0          | 0.000   | 0.000      | -     |  |
| RF00177_351_1I95_804_807_829_846        | 1          | 0          | 0.000   | Inf        | *     |  |
| RF00177_437_2QBF_488_495_500_509        | 0          | 0          | 0.000   | 0.000      | -     |  |
| RF00177_551_2UXD_494_500_507_515        | 0          | 0          | 0.000   | 0.000      | -     |  |
| RF00177_171_1HR0_804_807_829_846        | 1          | 0          | 0.000   | Inf        | *     |  |
| RF00177_1470_1XNQ_1103_1111_1121_1128   | 0          | 0          | 0.000   | 0.000      | -     |  |
| RF00177_1369_2GY9_669_675_686_695       | 2          | 0          | 0.000   | Inf        | *     |  |
| RF00177_524_1VOV_400_408_417_424        | 3          | 0          | 0.000   | Inf        | *     |  |
| RF00177_942_1N36_137_143_158_165        | 13         | 2          | 15.385  | 1.584      | *     |  |
| RF00177_857_3BBN_130_136_151_158        | 13         | 2          | 15.385  | 1.584      | *     |  |
| RF00177_1012_3FIH_120_126_141_148       | 13         | 2          | 15.385  | 1.267      | *     |  |
| RF00177_751_1IBL_660_665_676_684        | 4          | 1          | 25.000  | 2.924      | *     |  |
| RF00177_243_2QBB_382_389_400_406        | 4          | 1          | 25.000  | 0.609      | -     |  |
| RF01857_613_1QZW_192_198_207_213        | 16         | 4          | 25.000  | 1.462      | *     |  |
| RF00177_235_2HHH_1380_1383_1471_1475    | 179        | 47         | 26.257  | 1.809      | +     |  |
| RF00177_1_1J5E_482_490_519_521          | 10         | 3          | 30.000  | 0.696      | -     |  |
| RF00177_831_2V48_435_440_463_469        | 283        | 86         | 30.389  | 1.393      | +     |  |
| RF00177_206_2Z4M_419_423_456_461        | 1524       | 497        | 32.612  | 1.410      | +     |  |
| RF00177_1124_2VHP_419_427_452_461       | 6          | 2          | 33.333  | 1.299      | *     |  |
| RF00177_324_1VS5_475_484_513_516        | 3          | 1          | 33.333  | 1.949      | *     |  |
| RF00177_1_2GYB_490_498_527_529          | 9          | 3          | 33.333  | 0.877      | -     |  |
| RF00177_1312_2HGR_59_65_89_93           | 54         | 18         | 33.333  | 0.959      | -     |  |
| RF00177_874_2F4V_1225_1231_1262_1268    | 408        | 149        | 36.520  | 1.371      | +     |  |
| RF00177_325_1VS5_121_126_141_147        | 49         | 18         | 36.735  | 0.991      | -     |  |
| RF00177_145_2QBF_1222_1228_1259_1265    | 414        | 153        | 36.957  | 1.387      | +     |  |
| RF00177_955_2HHH_436_440_463_468        | 654        | 243        | 37.156  | 1.286      | +     |  |
| RF00167_327_1Y26_26_29_49_56            | 331        | 124        | 37.462  | 1.242      | *     |  |
| RF00177_1595_1N34_1100_1107_1122_1131   | 8          | 3          | 37.500  | 1.299      | *     |  |
| RF00001_5_1N8R_75_81_101_106            | 919        | 353        | 38.411  | 1.202      | *     |  |
| RF00177_32_1VOX_748_752_768_772         | 499        | 198        | 39.679  | 1.135      | *     |  |
| RF00177_11_2VHP_752_756_772_776         | 493        | 196        | 39.757  | 1.116      | *     |  |
| RF00001_1334_2GYC_21_28_52_58           | 1373       | 547        | 39.840  | 1.173      | *     |  |

Continued on next page

Table A – continued from previous page

| p-score > 0.9, 0.25 ≤ GC content ≤ 0.75 |                               |            |            |         |            |       |
|-----------------------------------------|-------------------------------|------------|------------|---------|------------|-------|
| ModelID                                 |                               | # original | # shuffled | FDR (%) | Odds ratio | Stat. |
| $\hat{F}_{rnaz}$                        |                               | 142 490    | 66 891     | 46.9%   |            |       |
| RF00177                                 | 35_2B9M_757_761_777_781       | 529        | 211        | 39.887  | 1.176      | *     |
| RF00177                                 | 418_1S1H_661_665_676_683      | 45         | 18         | 40.000  | 1.198      | *     |
| RF00015                                 | 758_2OZB_28_34_42_45          | 1964       | 791        | 40.275  | 1.113      | *     |
| RF00162                                 | 600_2GIS_17_21_32_39          | 642        | 259        | 40.343  | 1.091      | *     |
| RF00001                                 | 196_2QBE_69_77_95_103         | 2380       | 965        | 40.546  | 1.129      | *     |
| RF00177                                 | 90_1HNV_1281_1285_1308_1312   | 162        | 67         | 41.358  | 1.234      | *     |
| RF00177                                 | 1166_2UXD_1224_1231_1262_1269 | 227        | 96         | 42.291  | 1.102      | *     |
| RF00177                                 | 231_2GYB_766_770_786_790      | 527        | 224        | 42.505  | 1.033      | *     |
| RF00177                                 | 1114_2VHP_1404_1410_1441_1446 | 885        | 385        | 43.503  | 1.093      | *     |
| RF00001                                 | 449_3CCQ_32_37_43_48          | 3147       | 1371       | 43.565  | 1.092      | *     |
| RF00177                                 | 192_2QBD_657_661_672_679      | 41         | 18         | 43.902  | 1.276      | *     |
| RF00001                                 | 1060_3BBO_68_77_96_105        | 716        | 318        | 44.413  | 1.131      | *     |
| RF00177                                 | 284_2QBJ_1099_1104_1118_1124  | 223        | 102        | 45.740  | 1.116      | *     |
| RF00017                                 | 631_2J37_181_187_212_216      | 2512       | 1163       | 46.298  | 1.048      | *     |
| RF00177                                 | 1127_2VHO_1404_1411_1440_1446 | 219        | 102        | 46.575  | 1.069      | *     |
| RF00177                                 | 244_3DF3_1278_1282_1305_1309  | 126        | 61         | 48.413  | 1.044      | *     |
| RF00177                                 | 1303_2HHH_138_143_158_164     | 51         | 25         | 49.020  | 1.008      | *     |
| RF00017                                 | 1608_1L9A_190_194_205_209     | 196        | 97         | 49.490  | 1.010      | *     |
| RF00177                                 | 579_2J02_440_446_456_463      | 690        | 343        | 49.710  | 0.912      | -     |
| RF00177                                 | 1592_1N36_436_445_457_468     | 2          | 1          | 50.000  | 0.487      | -     |
| RF00059                                 | 318_2GDI_55_59_72_76          | 4865       | 2558       | 52.580  | 0.885      | -     |
| RF00177                                 | 432_2QP0_215_220_250_257      | 27         | 18         | 66.667  | 0.821      | -     |
| RF00169                                 | 236_1CQ5_37_41_52_56          | 82         | 57         | 69.512  | 0.796      | -     |
| RF00177                                 | 36_2QB9_862_869_880_885       | 11         | 8          | 72.727  | 0.975      | -     |
| RF00177                                 | 334_1HNW_233_238_268_275      | 21         | 16         | 76.190  | 0.717      | -     |
| RF00177                                 | 87_2QAN_541_548_855_857       | 7          | 6          | 85.714  | 0.304      | -     |
| RF00177                                 | 495_2B64_859_866_877_882      | 10         | 9          | 90.000  | 0.905      | -     |
| RF00177                                 | 1167_2UXD_399_407_418_425     | 1          | 3          | 300.000 | 0.162      | -     |

Table B: False discovery rates (FDR) for individual  $mRm_{IL}$  models with mean  $RMDetect$  score  $\geq Q_{0.75}$  in windows with p-score > 0.9 and  $0.25 \leq GC$  content  $\leq 0.75$  of order R. Status “+” denotes models with adjusted p-value  $\leq 0.05$  and odds ratio  $\geq 1.0$  whereas “\*” denotes models with odds ratio  $\geq 1.0$ . Models assigned with “-” are neither enriched nor occur at higher rates in the original data. Colored rows have an  $FDR \leq \hat{F}_{rnaz}$  and original window count  $\geq 6$ . The table is sorted in ascending order according to FDR.

| p-score > 0.9, 0.25 ≤ GC content ≤ 0.75 |                               |            |            |         |            |       |
|-----------------------------------------|-------------------------------|------------|------------|---------|------------|-------|
| ModelID                                 |                               | # original | # shuffled | FDR (%) | Odds ratio | Stat. |
| $\hat{F}_{rnaz}$                        |                               | 142 475    | 66 891     | 46.9%   |            |       |
| RF00011                                 | 1583_1NBS_177_190_209_219     | 0          | 0          | 0.000   | 0.000      | -     |
| RF00177                                 | 1133_2VHO_380_389_400_408     | 1          | 0          | 0.000   | Inf        | *     |
| RF00177                                 | 698_2B64_481_491_518_522      | 1          | 0          | 0.000   | Inf        | *     |
| RF01118                                 | 270_2QBC_13_17_35_55          | 0          | 0          | 0.000   | 0.000      | -     |
| RF00177                                 | 351_1I95_804_807_829_846      | 1          | 0          | 0.000   | Inf        | *     |
| RF00177                                 | 437_2QBF_488_495_500_509      | 0          | 0          | 0.000   | 0.000      | -     |
| RF00177                                 | 551_2UXD_494_500_507_515      | 0          | 0          | 0.000   | 0.000      | -     |
| RF00177                                 | 171_1HR0_804_807_829_846      | 1          | 0          | 0.000   | Inf        | *     |
| RF00177                                 | 1470_1XNQ_1103_1111_1121_1128 | 0          | 0          | 0.000   | 0.000      | -     |
| RF00177                                 | 1369_2GY9_669_675_686_695     | 2          | 0          | 0.000   | Inf        | *     |

Continued on next page

Table B – continued from previous page

| p-score > 0.9, 0.25 ≤ GC content ≤ 0.75 |                               |            |            |         |            |       |
|-----------------------------------------|-------------------------------|------------|------------|---------|------------|-------|
| ModelID                                 |                               | # original | # shuffled | FDR (%) | Odds ratio | Stat. |
| <i>F<sub>rnaz</sub></i>                 |                               | 142 475    | 66 891     | 46.9%   |            |       |
| RF00177                                 | 524_1VOV_400_408_417_424      | 2          | 0          | 0.000   | Inf        | *     |
| RF00177                                 | 942_1N36_137_143_158_165      | 13         | 2          | 15.385  | 1.686      | *     |
| RF00177                                 | 857_3BBN_130_136_151_158      | 13         | 2          | 15.385  | 1.686      | *     |
| RF00177                                 | 1012_3FIH_120_126_141_148     | 13         | 2          | 15.385  | 1.349      | *     |
| RF00177                                 | 243_2QBB_382_389_400_406      | 4          | 1          | 25.000  | 0.602      | -     |
| RF00177                                 | 235_2HHH_1380_1383_1471_1475  | 183        | 47         | 25.683  | 1.866      | +     |
| RF01857                                 | 613_1QZW_192_198_207_213      | 15         | 4          | 26.667  | 1.284      | *     |
| RF00177                                 | 1_1J5E_482_490_519_521        | 10         | 3          | 30.000  | 0.688      | -     |
| RF00177                                 | 1312_2HGR_59_65_89_93         | 58         | 18         | 31.034  | 1.025      | *     |
| RF00177                                 | 831_2V48_435_440_463_469      | 277        | 86         | 31.047  | 1.357      | +     |
| RF00177                                 | 206_2Z4M_419_423_456_461      | 1553       | 497        | 32.003  | 1.433      | +     |
| RF00177                                 | 751_1IBL_660_665_676_684      | 3          | 1          | 33.333  | 2.890      | *     |
| RF00177                                 | 1124_2VHP_419_427_452_461     | 6          | 2          | 33.333  | 1.284      | *     |
| RF00177                                 | 324_1VS5_475_484_513_516      | 3          | 1          | 33.333  | 1.927      | *     |
| RF00177                                 | 1_2GYB_490_498_527_529        | 9          | 3          | 33.333  | 0.963      | -     |
| RF00177                                 | 325_1VS5_121_126_141_147      | 51         | 18         | 35.294  | 0.996      | -     |
| RF00177                                 | 874_2F4V_1225_1231_1262_1268  | 421        | 149        | 35.392  | 1.414      | +     |
| RF00177                                 | 145_2QBF_1222_1228_1259_1265  | 426        | 153        | 35.915  | 1.432      | +     |
| RF00177                                 | 955_2HHH_436_440_463_468      | 676        | 243        | 35.947  | 1.334      | +     |
| RF00167                                 | 327_1Y26_26_29_49_56          | 338        | 124        | 36.686  | 1.303      | +     |
| RF00177                                 | 1595_1N34_1100_1107_1122_1131 | 8          | 3          | 37.500  | 1.445      | *     |
| RF00177                                 | 32_1VOX_748_752_768_772       | 517        | 198        | 38.298  | 1.195      | *     |
| RF00177                                 | 11_2VHP_752_756_772_776       | 510        | 196        | 38.431  | 1.174      | *     |
| RF00001                                 | 5_1N8R_75_81_101_106          | 916        | 353        | 38.537  | 1.195      | *     |
| RF00177                                 | 90_1HNW_1281_1285_1308_1312   | 171        | 67         | 39.181  | 1.281      | *     |
| RF00001                                 | 1334_2GYC_21_28_52_58         | 1395       | 547        | 39.211  | 1.183      | *     |
| RF00177                                 | 35_2B9M_757_761_777_781       | 535        | 211        | 39.439  | 1.186      | *     |
| RF00162                                 | 600_2GIS_17_21_32_39          | 652        | 259        | 39.724  | 1.088      | *     |
| RF00177                                 | 418_1S1H_661_665_676_683      | 45         | 18         | 40.000  | 1.184      | *     |
| RF00015                                 | 758_2OZB_28_34_42_45          | 1964       | 791        | 40.275  | 1.105      | *     |
| RF00001                                 | 196_2QBE_69_77_95_103         | 2394       | 965        | 40.309  | 1.131      | *     |
| RF00177                                 | 1166_2UXD_1224_1231_1262_1269 | 237        | 96         | 40.506  | 1.162      | *     |
| RF00177                                 | 231_2GYB_766_770_786_790      | 545        | 224        | 41.101  | 1.085      | *     |
| RF00177                                 | 1114_2VHP_1404_1410_1441_1446 | 888        | 385        | 43.356  | 1.099      | *     |
| RF00001                                 | 449_3CCQ_32_37_43_48          | 3147       | 1371       | 43.565  | 1.095      | *     |
| RF00177                                 | 192_2QBD_657_661_672_679      | 41         | 18         | 43.902  | 1.261      | *     |
| RF00001                                 | 1060_3BBO_68_77_96_105        | 714        | 318        | 44.538  | 1.126      | *     |
| RF00177                                 | 284_2QBJ_1099_1104_1118_1124  | 226        | 102        | 45.133  | 1.132      | *     |
| RF00177                                 | 1127_2VHO_1404_1411_1440_1446 | 221        | 102        | 46.154  | 1.090      | *     |
| RF00017                                 | 631_2J37_181_187_212_216      | 2487       | 1163       | 46.763  | 1.049      | *     |
| RF00177                                 | 244_3DF3_1278_1282_1305_1309  | 130        | 61         | 46.923  | 1.080      | *     |
| RF00177                                 | 1303_2HHH_138_143_158_164     | 53         | 25         | 47.170  | 1.046      | *     |
| RF00017                                 | 1608_1L9A_190_194_205_209     | 197        | 97         | 49.239  | 0.994      | -     |
| RF00177                                 | 1592_1N36_436_445_457_468     | 2          | 1          | 50.000  | 0.482      | -     |
| RF00177                                 | 579_2J02_440_446_456_463      | 680        | 343        | 50.441  | 0.915      | -     |
| RF00059                                 | 318_2GDI_55_59_72_76          | 4893       | 2558       | 52.279  | 0.887      | -     |
| RF00177                                 | 432_2QP0_215_220_250_257      | 31         | 18         | 58.065  | 0.887      | -     |
| RF00177                                 | 334_1HNW_233_238_268_275      | 25         | 16         | 64.000  | 0.765      | -     |
| RF00177                                 | 36_2QB9_862_869_880_885       | 12         | 8          | 66.667  | 0.963      | -     |
| RF00169                                 | 236_1CQ5_37_41_52_56          | 79         | 57         | 72.152  | 0.803      | -     |
| RF00177                                 | 87_2QAN_541_548_855_857       | 7          | 6          | 85.714  | 0.301      | -     |
| RF00177                                 | 495_2B64_859_866_877_882      | 10         | 9          | 90.000  | 0.826      | -     |
| RF00177                                 | 1167_2UXD_399_407_418_425     | 1          | 3          | 300.000 | 0.161      | -     |

Table C: False discovery rates (FDR) for individual JAR3D IL models with mean interior edit distance  $\leq 4$  and passed cutoff  $\geq 50$  in windows with p-score  $> 0.9$  and  $0.25 \leq \text{GC content} \leq 0.75$  of order L. Status “+” denotes models with adjusted p-value  $\leq 0.05$  and odds ratio  $\geq 1.0$  whereas “\*” denotes models with odds ratio  $\geq 1.0$ . Models assigned with “-” are neither enriched nor occur at higher rates in the original data. “Msl” = mean sequence length of module instances. Colored rows have an FDR  $\leq \hat{F}_{rnaz}$ , original window count  $\geq 6$ , and Msl  $\geq 9$ . The table is sorted in ascending order according to FDR.

| <b>p-score <math>&gt; 0.9</math>, <math>0.25 \leq \text{GC content} \leq 0.75</math></b> |            |            |         |            |       |      |
|------------------------------------------------------------------------------------------|------------|------------|---------|------------|-------|------|
| ModelID                                                                                  | # original | # shuffled | FDR (%) | Odds ratio | Stat. | Msl  |
| $\hat{F}_{rnaz}$                                                                         | 142 490    | 66 891     | 46.9%   |            |       |      |
| IL_05513.1                                                                               | 2          | 0          | 0.000   | Inf        | *     | 12   |
| IL_39324.1                                                                               | 0          | 0          | 0.000   | 0.000      | -     | 20   |
| IL_40527.1                                                                               | 0          | 0          | 0.000   | 0.000      | -     | 16   |
| IL_42891.1                                                                               | 1          | 0          | 0.000   | Inf        | *     | 16   |
| IL_46435.1                                                                               | 7          | 0          | 0.000   | Inf        | *     | 13   |
| IL_52610.1                                                                               | 0          | 0          | 0.000   | 0.000      | -     | 37   |
| IL_76095.3                                                                               | 0          | 0          | 0.000   | 0.000      | -     | 20   |
| IL_76263.1                                                                               | 0          | 0          | 0.000   | 0.000      | -     | 19   |
| IL_77076.1                                                                               | 0          | 0          | 0.000   | 0.000      | -     | 18   |
| IL_77296.1                                                                               | 0          | 0          | 0.000   | 0.000      | -     | 15   |
| IL_06847.1                                                                               | 7          | 0          | 0.000   | Inf        | *     | 13   |
| IL_88367.1                                                                               | 0          | 0          | 0.000   | 0.000      | -     | 15   |
| IL_89028.6                                                                               | 0          | 0          | 0.000   | 0.000      | -     | 16   |
| IL_90057.1                                                                               | 0          | 0          | 0.000   | 0.000      | -     | 25   |
| IL_94744.1                                                                               | 2          | 0          | 0.000   | Inf        | *     | 17   |
| IL_97842.1                                                                               | 0          | 0          | 0.000   | 0.000      | -     | 16   |
| IL_98655.1                                                                               | 0          | 0          | 0.000   | 0.000      | -     | 16   |
| IL_02359.3                                                                               | 0          | 0          | 0.000   | 0.000      | -     | 17.6 |
| IL_16330.1                                                                               | 0          | 0          | 0.000   | 0.000      | -     | 28   |
| IL_21421.1                                                                               | 0          | 0          | 0.000   | 0.000      | -     | 20   |
| IL_21495.1                                                                               | 1          | 0          | 0.000   | 0.000      | -     | 15   |
| IL_23414.1                                                                               | 0          | 0          | 0.000   | 0.000      | -     | 21   |
| IL_25082.1                                                                               | 3          | 0          | 0.000   | Inf        | *     | 18   |
| IL_25230.3                                                                               | 0          | 0          | 0.000   | 0.000      | -     | 18   |
| IL_27668.1                                                                               | 2          | 0          | 0.000   | Inf        | *     | 12   |
| IL_28572.2                                                                               | 7          | 0          | 0.000   | Inf        | *     | 16   |
| IL_33964.1                                                                               | 0          | 0          | 0.000   | 0.000      | -     | 23   |
| IL_80505.1                                                                               | 11         | 1          | 9.091   | 4.386      | *     | 11   |
| IL_34628.2                                                                               | 79         | 11         | 13.924  | 2.491      | +     | 13   |
| IL_39526.4                                                                               | 7          | 1          | 14.286  | 2.924      | *     | 9    |
| IL_98591.3                                                                               | 6          | 1          | 16.667  | 2.436      | *     | 16   |
| IL_63133.1                                                                               | 53         | 9          | 16.981  | 2.925      | +     | 6    |
| IL_23448.1                                                                               | 92         | 16         | 17.391  | 3.225      | +     | 6    |

Continued on next page

Table C – continued from previous page

| p-score > 0.9, 0.25 ≤ GC content ≤ 0.75 |            |            |         |            |       |       |
|-----------------------------------------|------------|------------|---------|------------|-------|-------|
| ModelID                                 | # original | # shuffled | FDR (%) | Odds ratio | Stat. | Msl   |
| $\bar{F}_{rnaz}$                        | 142 490    | 66 891     | 46.9%   |            |       |       |
| IL_61730.1                              | 28         | 5          | 17.857  | 2.339      | *     | 11    |
| IL_21639.1                              | 51         | 10         | 19.608  | 2.329      | *     | 9     |
| IL_77014.1                              | 5          | 1          | 20.000  | Inf        | *     | 11    |
| IL_57364.1                              | 29         | 6          | 20.690  | 2.534      | *     | 8     |
| IL_86357.3                              | 82         | 17         | 20.732  | 2.315      | +     | 6     |
| IL_41791.1                              | 92         | 20         | 21.739  | 1.488      | *     | 12    |
| IL_34363.2                              | 23         | 5          | 21.739  | 2.437      | *     | 14    |
| IL_96206.3                              | 315        | 72         | 22.857  | 2.192      | +     | 6     |
| IL_73000.2                              | 274        | 63         | 22.993  | 2.223      | +     | 6.57  |
| IL_58291.4                              | 134        | 31         | 23.134  | 2.360      | +     | 6     |
| IL_28644.1                              | 157        | 38         | 24.204  | 2.128      | +     | 6     |
| IL_06177.1                              | 41         | 10         | 24.390  | 1.852      | *     | 6     |
| IL_69799.1                              | 123        | 30         | 24.390  | 2.184      | +     | 6     |
| IL_54450.1                              | 45         | 11         | 24.444  | 1.728      | *     | 8     |
| IL_73276.5                              | 217        | 54         | 24.885  | 1.951      | +     | 8.18  |
| IL_71942.1                              | 12         | 3          | 25.000  | 1.462      | *     | 10    |
| IL_75415.1                              | 8          | 2          | 25.000  | 0.975      | -     | 10    |
| IL_85647.3                              | 16         | 4          | 25.000  | 1.706      | *     | 15.06 |
| IL_91089.1                              | 48         | 12         | 25.000  | 2.715      | +     | 8     |
| IL_99397.1                              | 20         | 5          | 25.000  | 1.657      | *     | 9     |
| IL_31066.3                              | 44         | 11         | 25.000  | 1.949      | *     | 7     |
| IL_43877.1                              | 91         | 23         | 25.275  | 1.759      | +     | 7.5   |
| IL_70173.1                              | 185        | 48         | 25.946  | 1.895      | +     | 7.5   |
| IL_37406.1                              | 99         | 26         | 26.263  | 1.795      | +     | 8.5   |
| IL_39980.1                              | 125        | 33         | 26.400  | 1.842      | +     | 8     |
| IL_98421.4                              | 125        | 33         | 26.400  | 1.698      | +     | 7     |
| IL_37325.1                              | 53         | 14         | 26.415  | 2.031      | *     | 7     |
| IL_87065.1                              | 147        | 39         | 26.531  | 1.681      | +     | 7     |
| IL_92027.3                              | 165        | 44         | 26.667  | 1.924      | +     | 6.24  |
| IL_92027.3                              | 165        | 44         | 26.667  | 1.924      | +     | 6.24  |
| IL_67887.1                              | 231        | 62         | 26.840  | 1.800      | +     | 6.5   |
| IL_28947.2                              | 346        | 93         | 26.879  | 1.869      | +     | 5.45  |
| IL_40845.1                              | 212        | 57         | 26.887  | 1.727      | +     | 8     |
| IL_06808.1                              | 103        | 28         | 27.184  | 1.599      | *     | 9     |
| IL_41153.1                              | 33         | 9          | 27.273  | 1.516      | *     | 8     |
| IL_58586.2                              | 330        | 90         | 27.273  | 1.787      | +     | 7     |
| IL_50911.1                              | 40         | 11         | 27.500  | 1.841      | *     | 8     |
| IL_44540.4                              | 224        | 62         | 27.679  | 1.756      | +     | 5.3   |
| IL_39199.4                              | 289        | 80         | 27.682  | 1.775      | +     | 5.28  |
| IL_97217.11                             | 371        | 103        | 27.763  | 1.750      | +     | 5.14  |
| IL_43946.1                              | 18         | 5          | 27.778  | 1.584      | *     | 12    |
| IL_98566.1                              | 96         | 27         | 28.125  | 1.462      | *     | 9     |
| IL_50521.1                              | 63         | 18         | 28.571  | 1.491      | *     | 15    |
| IL_11751.1                              | 42         | 12         | 28.571  | 1.418      | *     | 7     |

Continued on next page

Table C – continued from previous page

| p-score > 0.9, 0.25 ≤ GC content ≤ 0.75 |            |            |         |            |       |      |
|-----------------------------------------|------------|------------|---------|------------|-------|------|
| ModelID                                 | # original | # shuffled | FDR (%) | Odds ratio | Stat. | Msl  |
| $\hat{F}_{rnaz}$                        | 142 490    | 66 891     | 46.9%   |            |       |      |
| IL_25300.3                              | 309        | 89         | 28.803  | 1.674      | +     | 5.29 |
| IL_47875.1                              | 548        | 160        | 29.197  | 1.730      | +     | 7.67 |
| IL_92109.3                              | 567        | 166        | 29.277  | 1.634      | +     | 6.07 |
| IL_46648.6                              | 235        | 69         | 29.362  | 1.652      | +     | 5.62 |
| IL_94430.5                              | 383        | 113        | 29.504  | 1.621      | +     | 5.94 |
| IL_15205.1                              | 151        | 45         | 29.801  | 1.414      | *     | 13   |
| IL_56465.4                              | 512        | 153        | 29.883  | 1.561      | +     | 5.74 |
| IL_01080.1                              | 226        | 68         | 30.088  | 1.650      | +     | 8    |
| IL_31039.1                              | 63         | 19         | 30.159  | 1.605      | *     | 7    |
| IL_56513.1                              | 112        | 34         | 30.357  | 1.386      | *     | 9    |
| IL_31663.1                              | 112        | 34         | 30.357  | 1.415      | *     | 7.5  |
| IL_20775.1                              | 69         | 21         | 30.435  | 1.462      | *     | 8    |
| IL_09491.1                              | 36         | 11         | 30.556  | 1.462      | *     | 8    |
| IL_82444.1                              | 191        | 59         | 30.890  | 1.437      | *     | 6.59 |
| IL_41139.1                              | 64         | 20         | 31.250  | 1.411      | *     | 8    |
| IL_68767.1                              | 105        | 33         | 31.429  | 1.654      | *     | 6    |
| IL_18675.1                              | 105        | 33         | 31.429  | 1.625      | *     | 7    |
| IL_13069.3                              | 91         | 29         | 31.868  | 1.294      | *     | 8    |
| IL_86059.1                              | 116        | 37         | 31.897  | 1.536      | *     | 7    |
| IL_17066.1                              | 72         | 23         | 31.944  | 1.420      | *     | 6    |
| IL_63253.1                              | 97         | 31         | 31.959  | 1.657      | *     | 7    |
| IL_21254.1                              | 50         | 16         | 32.000  | 1.218      | *     | 14   |
| IL_17212.2                              | 230        | 74         | 32.174  | 1.375      | *     | 6.73 |
| IL_21333.2                              | 299        | 97         | 32.441  | 1.507      | +     | 9.5  |
| IL_88119.1                              | 199        | 65         | 32.663  | 1.463      | +     | 8    |
| IL_02809.3                              | 281        | 92         | 32.740  | 1.590      | +     | 9.11 |
| IL_80348.3                              | 191        | 63         | 32.984  | 1.505      | +     | 6.33 |
| IL_31006.1                              | 218        | 72         | 33.028  | 1.325      | *     | 12   |
| IL_12147.1                              | 220        | 73         | 33.182  | 1.448      | +     | 6.5  |
| IL_37347.1                              | 18         | 6          | 33.333  | 1.364      | *     | 16   |
| IL_47732.1                              | 21         | 7          | 33.333  | 1.183      | *     | 9    |
| IL_86981.1                              | 3          | 1          | 33.333  | 0.975      | -     | 15   |
| IL_91379.1                              | 9          | 3          | 33.333  | 1.706      | *     | 12   |
| IL_35043.1                              | 6          | 2          | 33.333  | 1.462      | *     | 11   |
| IL_47174.11                             | 295        | 99         | 33.559  | 1.380      | +     | 6.2  |
| IL_16166.4                              | 140        | 47         | 33.571  | 1.419      | *     | 5    |
| IL_13777.1                              | 118        | 40         | 33.898  | 1.462      | *     | 5    |
| IL_95150.6                              | 76         | 26         | 34.211  | 1.584      | *     | 8.33 |
| IL_90133.3                              | 166        | 57         | 34.337  | 1.334      | *     | 8    |
| IL_13959.4                              | 183        | 63         | 34.426  | 1.367      | *     | 8.23 |
| IL_42251.1                              | 209        | 72         | 34.450  | 1.397      | *     | 7    |
| IL_25271.2                              | 26         | 9          | 34.615  | 1.868      | *     | 15   |
| IL_37104.3                              | 219        | 76         | 34.703  | 1.305      | *     | 7.36 |
| IL_71685.1                              | 92         | 32         | 34.783  | 1.186      | *     | 14   |

Continued on next page

Table C – continued from previous page

| p-score > 0.9, 0.25 ≤ GC content ≤ 0.75 |            |            |         |            |       |       |
|-----------------------------------------|------------|------------|---------|------------|-------|-------|
| ModelID                                 | # original | # shuffled | FDR (%) | Odds ratio | Stat. | Msl   |
| $\bar{F}_{rnaz}$                        | 142 490    | 66 891     | 46.9%   |            |       |       |
| IL_57785.5                              | 54         | 19         | 35.185  | 1.319      | *     | 9     |
| IL_23262.4                              | 535        | 189        | 35.327  | 1.372      | +     | 11    |
| IL_69106.1                              | 205        | 73         | 35.610  | 1.279      | *     | 8.5   |
| IL_90459.3                              | 537        | 192        | 35.754  | 1.283      | +     | 7.56  |
| IL_80494.2                              | 591        | 213        | 36.041  | 1.246      | *     | 12.67 |
| IL_46721.1                              | 102        | 37         | 36.275  | 1.584      | *     | 11    |
| IL_22909.1                              | 118        | 43         | 36.441  | 1.283      | *     | 9     |
| IL_79083.3                              | 798        | 291        | 36.466  | 1.286      | +     | 11    |
| IL_30381.1                              | 71         | 26         | 36.620  | 1.377      | *     | 8.5   |
| IL_88865.1                              | 30         | 11         | 36.667  | 1.408      | *     | 9     |
| IL_11778.1                              | 38         | 14         | 36.842  | 1.237      | *     | 8     |
| IL_63952.1                              | 617        | 228        | 36.953  | 1.264      | +     | 13    |
| IL_55938.4                              | 339        | 126        | 37.168  | 1.256      | *     | 7.56  |
| IL_43316.1                              | 1022       | 380        | 37.182  | 1.229      | *     | 11    |
| IL_87507.1                              | 258        | 96         | 37.209  | 1.124      | *     | 9.5   |
| IL_39355.1                              | 400        | 150        | 37.500  | 1.193      | *     | 9     |
| IL_08926.3                              | 114        | 43         | 37.719  | 1.255      | *     | 5.5   |
| IL_47758.2                              | 127        | 48         | 37.795  | 1.192      | *     | 8.5   |
| IL_55649.1                              | 452        | 171        | 37.832  | 1.208      | *     | 9     |
| IL_97296.1                              | 234        | 89         | 38.034  | 1.183      | *     | 8.5   |
| IL_83920.1                              | 68         | 26         | 38.235  | 1.170      | *     | 7     |
| IL_70401.1                              | 13         | 5          | 38.462  | 1.218      | *     | 11    |
| IL_05684.1                              | 262        | 101        | 38.550  | 1.235      | *     | 9     |
| IL_78513.1                              | 31         | 12         | 38.710  | 0.930      | -     | 10    |
| IL_87394.1                              | 31         | 12         | 38.710  | 0.934      | -     | 10    |
| IL_87904.5                              | 1389       | 538        | 38.733  | 1.219      | *     | 10    |
| IL_43124.2                              | 190        | 74         | 38.947  | 1.137      | *     | 7.09  |
| IL_83856.1                              | 646        | 252        | 39.009  | 1.267      | +     | 12    |
| IL_41766.6                              | 379        | 148        | 39.050  | 1.208      | *     | 8.26  |
| IL_64589.1                              | 64         | 25         | 39.062  | 1.323      | *     | 8     |
| IL_12211.1                              | 151        | 59         | 39.073  | 1.275      | *     | 13.5  |
| IL_57977.1                              | 87         | 34         | 39.080  | 1.088      | *     | 11    |
| IL_06421.1                              | 115        | 45         | 39.130  | 1.063      | *     | 8     |
| IL_65553.8                              | 130        | 51         | 39.231  | 1.257      | *     | 13.3  |
| IL_24546.4                              | 175        | 69         | 39.429  | 1.223      | *     | 10    |
| IL_74876.2                              | 1017       | 401        | 39.430  | 1.220      | *     | 10.67 |
| IL_06471.1                              | 595        | 235        | 39.496  | 1.158      | *     | 10    |
| IL_26971.1                              | 1027       | 409        | 39.825  | 1.159      | *     | 11    |
| IL_06211.3                              | 158        | 63         | 39.873  | 1.237      | *     | 9.33  |
| IL_75328.1                              | 25         | 10         | 40.000  | 1.532      | *     | 14    |
| IL_00998.1                              | 110        | 44         | 40.000  | 1.238      | *     | 8     |
| IL_82650.1                              | 15         | 6          | 40.000  | 0.812      | -     | 13    |
| IL_15840.2                              | 874        | 350        | 40.046  | 1.138      | *     | 11    |
| IL_77263.2                              | 354        | 142        | 40.113  | 1.095      | *     | 11    |

Continued on next page

Table C – continued from previous page

| p-score > 0.9, 0.25 ≤ GC content ≤ 0.75 |            |            |         |            |       |       |
|-----------------------------------------|------------|------------|---------|------------|-------|-------|
| ModelID                                 | # original | # shuffled | FDR (%) | Odds ratio | Stat. | Msl   |
| $\bar{F}_{rnaz}$                        | 142 490    | 66 891     | 46.9%   |            |       |       |
| IL_24982.5                              | 1614       | 650        | 40.273  | 1.165      | *     | 10    |
| IL_37197.1                              | 804        | 324        | 40.299  | 1.168      | *     | 11    |
| IL_22732.1                              | 209        | 85         | 40.670  | 1.133      | *     | 9     |
| IL_85510.1                              | 853        | 348        | 40.797  | 1.107      | *     | 11    |
| IL_97191.1                              | 17         | 7          | 41.176  | 1.137      | *     | 13    |
| IL_97509.1                              | 889        | 369        | 41.507  | 1.102      | *     | 10.5  |
| IL_80714.1                              | 563        | 234        | 41.563  | 1.132      | *     | 12    |
| IL_47444.3                              | 953        | 399        | 41.868  | 1.089      | *     | 12    |
| IL_70237.3                              | 1093       | 459        | 41.995  | 1.122      | *     | 10    |
| IL_07300.2                              | 150        | 63         | 42.000  | 1.110      | *     | 9.33  |
| IL_80093.1                              | 740        | 311        | 42.027  | 1.125      | *     | 11    |
| IL_31224.1                              | 364        | 153        | 42.033  | 1.039      | *     | 10    |
| IL_53635.3                              | 121        | 51         | 42.149  | 1.200      | *     | 13    |
| IL_45794.1                              | 52         | 22         | 42.308  | 0.950      | -     | 14    |
| IL_93568.2                              | 234        | 99         | 42.308  | 1.098      | *     | 12.5  |
| IL_93424.4                              | 743        | 315        | 42.396  | 1.076      | *     | 10.19 |
| IL_39585.1                              | 1205       | 511        | 42.407  | 1.115      | *     | 12    |
| IL_87548.1                              | 510        | 217        | 42.549  | 1.100      | *     | 11.5  |
| IL_05723.1                              | 568        | 243        | 42.782  | 1.141      | *     | 10    |
| IL_11302.1                              | 1068       | 457        | 42.790  | 1.025      | *     | 10    |
| IL_09587.1                              | 3315       | 1419       | 42.805  | 1.071      | *     | 11.5  |
| IL_45262.4                              | 175        | 75         | 42.857  | 1.057      | *     | 9.25  |
| IL_52509.1                              | 630        | 270        | 42.857  | 1.016      | *     | 10    |
| IL_70299.1                              | 95         | 41         | 43.158  | 1.147      | *     | 14    |
| IL_46306.1                              | 1422       | 616        | 43.319  | 1.042      | *     | 10    |
| IL_21077.1                              | 203        | 88         | 43.350  | 1.001      | *     | 10    |
| IL_25380.1                              | 191        | 83         | 43.455  | 1.078      | *     | 8.33  |
| IL_09333.1                              | 377        | 164        | 43.501  | 1.070      | *     | 13    |
| IL_79955.2                              | 429        | 187        | 43.590  | 1.097      | *     | 12.67 |
| IL_69536.1                              | 1303       | 569        | 43.668  | 1.090      | *     | 10    |
| IL_31555.5                              | 746        | 328        | 43.968  | 1.064      | *     | 9.23  |
| IL_86336.1                              | 352        | 156        | 44.318  | 0.997      | -     | 10    |
| IL_06468.1                              | 313        | 140        | 44.728  | 1.041      | *     | 11    |
| IL_46034.3                              | 96         | 43         | 44.792  | 0.962      | -     | 9     |
| IL_09530.1                              | 790        | 354        | 44.810  | 1.038      | *     | 11.5  |
| IL_82563.1                              | 60         | 27         | 45.000  | 0.975      | -     | 10    |
| IL_54966.1                              | 332        | 150        | 45.181  | 1.012      | *     | 9     |
| IL_23639.1                              | 1379       | 626        | 45.395  | 1.029      | *     | 10    |
| IL_52173.1                              | 198        | 90         | 45.455  | 1.055      | *     | 9     |
| IL_17603.1                              | 409        | 187        | 45.721  | 1.147      | *     | 12    |
| IL_58454.1                              | 694        | 318        | 45.821  | 1.044      | *     | 10    |
| IL_54470.1                              | 438        | 201        | 45.890  | 0.971      | -     | 9     |
| IL_38807.3                              | 76         | 35         | 46.053  | 1.162      | *     | 12.75 |
| IL_06180.1                              | 1092       | 507        | 46.429  | 1.001      | *     | 10.67 |

Continued on next page



Table C – continued from previous page

| p-score > 0.9, 0.25 ≤ GC content ≤ 0.75 |            |            |         |            |       |       |
|-----------------------------------------|------------|------------|---------|------------|-------|-------|
| ModelID                                 | # original | # shuffled | FDR (%) | Odds ratio | Stat. | Msl   |
| $\bar{F}_{rnaz}$                        | 142 490    | 66 891     | 46.9%   |            |       |       |
| IL_95652.3                              | 43         | 20         | 46.512  | 1.007      | *     | 14    |
| IL_82188.2                              | 273        | 127        | 46.520  | 0.952      | -     | 14    |
| IL_87523.1                              | 170        | 80         | 47.059  | 1.006      | *     | 11    |
| IL_16415.2                              | 17         | 8          | 47.059  | 0.792      | -     | 15    |
| IL_03110.1                              | 448        | 211        | 47.098  | 0.983      | -     | 13    |
| IL_52958.1                              | 3115       | 1470       | 47.191  | 0.993      | -     | 10    |
| IL_30067.1                              | 332        | 157        | 47.289  | 1.045      | *     | 10    |
| IL_06306.1                              | 38         | 18         | 47.368  | 1.312      | *     | 14    |
| IL_26868.1                              | 472        | 224        | 47.458  | 0.969      | -     | 11    |
| IL_59529.1                              | 578        | 275        | 47.578  | 1.013      | *     | 11    |
| IL_91044.1                              | 382        | 182        | 47.644  | 0.978      | -     | 11    |
| IL_46301.1                              | 291        | 139        | 47.766  | 0.995      | -     | 9.43  |
| IL_78744.1                              | 23         | 11         | 47.826  | 1.323      | *     | 12    |
| IL_24293.1                              | 81         | 39         | 48.148  | 0.893      | -     | 8.5   |
| IL_53988.1                              | 120        | 58         | 48.333  | 0.897      | -     | 13    |
| IL_49493.4                              | 132        | 64         | 48.485  | 0.938      | -     | 13    |
| IL_98924.1                              | 500        | 243        | 48.600  | 0.886      | -     | 10    |
| IL_96446.1                              | 146        | 71         | 48.630  | 0.871      | -     | 11    |
| IL_97057.3                              | 820        | 399        | 48.659  | 1.000      | *     | 11.83 |
| IL_81398.1                              | 3817       | 1861       | 48.756  | 0.968      | -     | 10    |
| IL_12507.1                              | 92         | 45         | 48.913  | 0.938      | -     | 13    |
| IL_03282.1                              | 143        | 70         | 48.951  | 0.921      | -     | 10    |
| IL_28003.1                              | 65         | 32         | 49.231  | 1.044      | *     | 8.67  |
| IL_62499.7                              | 560        | 278        | 49.643  | 0.898      | -     | 11    |
| IL_92321.4                              | 559        | 278        | 49.732  | 0.930      | -     | 12.14 |
| IL_49527.1                              | 894        | 445        | 49.776  | 0.969      | -     | 10    |
| IL_65137.1                              | 108        | 54         | 50.000  | 0.932      | -     | 13    |
| IL_66744.1                              | 94         | 47         | 50.000  | 0.868      | -     | 14    |
| IL_80652.1                              | 18         | 9          | 50.000  | 1.044      | *     | 14    |
| IL_82601.1                              | 2          | 1          | 50.000  | Inf        | *     | 8     |
| IL_94403.5                              | 2          | 1          | 50.000  | Inf        | *     | 12.75 |
| IL_02835.1                              | 4          | 2          | 50.000  | 1.949      | *     | 13    |
| IL_27640.1                              | 2          | 1          | 50.000  | 0.975      | -     | 15    |
| IL_33842.1                              | 26         | 13         | 50.000  | 0.934      | -     | 9     |
| IL_46990.1                              | 2086       | 1051       | 50.384  | 0.944      | -     | 12.5  |
| IL_30840.2                              | 2798       | 1411       | 50.429  | 0.928      | -     | 11.33 |
| IL_37053.1                              | 299        | 151        | 50.502  | 0.954      | -     | 13.67 |
| IL_85805.1                              | 1094       | 555        | 50.731  | 0.946      | -     | 9     |
| IL_53323.1                              | 1176       | 597        | 50.765  | 0.893      | -     | 10    |
| IL_40892.1                              | 121        | 62         | 51.240  | 1.052      | *     | 11    |
| IL_72158.3                              | 161        | 83         | 51.553  | 0.892      | -     | 13    |
| IL_83250.1                              | 147        | 76         | 51.701  | 1.002      | *     | 11    |
| IL_48918.3                              | 86         | 45         | 52.326  | 0.909      | -     | 13    |
| IL_25307.1                              | 70         | 37         | 52.857  | 0.821      | -     | 9     |

Continued on next page

**Table C – continued from previous page**

| <b>p-score &gt; 0.9, 0.25 ≤ GC content ≤ 0.75</b> |            |            |         |            |       |      |
|---------------------------------------------------|------------|------------|---------|------------|-------|------|
| ModelID                                           | # original | # shuffled | FDR (%) | Odds ratio | Stat. | Msl  |
| $\hat{F}_{rnaz}$                                  | 142 490    | 66 891     | 46.9%   |            |       |      |
| IL_09882.1                                        | 122        | 65         | 53.279  | 1.018      | *     | 12   |
| IL_91078.1                                        | 15         | 8          | 53.333  | 0.975      | -     | 14   |
| IL_25181.1                                        | 1247       | 673        | 53.970  | 0.902      | -     | 13   |
| IL_49976.1                                        | 1247       | 693        | 55.573  | 0.846      | -     | 13   |
| IL_31754.1                                        | 7          | 4          | 57.143  | 0.731      | -     | 13   |
| IL_97833.1                                        | 33         | 19         | 57.576  | 1.012      | *     | 14   |
| IL_47687.1                                        | 291        | 168        | 57.732  | 0.842      | -     | 14   |
| IL_59934.1                                        | 94         | 55         | 58.511  | 0.879      | -     | 13   |
| IL_89794.1                                        | 29         | 17         | 58.621  | 0.870      | -     | 14   |
| IL_60649.1                                        | 51         | 30         | 58.824  | 0.758      | -     | 13   |
| IL_92114.3                                        | 74         | 44         | 59.459  | 0.837      | -     | 9    |
| IL_31707.1                                        | 13         | 8          | 61.538  | 0.731      | -     | 11   |
| IL_52940.1                                        | 270        | 167        | 61.852  | 0.853      | -     | 15.5 |
| IL_44067.4                                        | 16         | 10         | 62.500  | 0.731      | -     | 14   |
| IL_54954.1                                        | 3          | 2          | 66.667  | 1.462      | *     | 17   |
| IL_76486.1                                        | 3          | 2          | 66.667  | 0.731      | -     | 15   |
| IL_94973.1                                        | 17         | 12         | 70.588  | 0.532      | -     | 14   |
| IL_68827.1                                        | 35         | 27         | 77.143  | 0.508      | -     | 11   |
| IL_17682.1                                        | 1          | 1          | 100.000 | 0.000      | -     | 17   |
| IL_05221.1                                        | 3          | 3          | 100.000 | 0.325      | -     | 17   |
| IL_90735.1                                        | 20         | 21         | 105.000 | 0.585      | -     | 17   |
| IL_27243.1                                        | 2          | 3          | 150.000 | 0.244      | -     | 15   |
| IL_57285.1                                        | 0          | 1          | Inf     | 0.000      | -     | 13   |
| IL_91904.1                                        | 0          | 1          | Inf     | 0.000      | -     | 17   |

Table D: False discovery rates (FDR) for individual JAR3D IL models with mean interior edit distance  $\leq 4$  and passed cutoff  $\geq 50$  in windows with p-score  $> 0.9$  and  $0.25 \leq \text{GC content} \leq 0.75$  of order R. Status “+” denotes models with adjusted p-value  $\leq 0.05$  and odds ratio  $\geq 1.0$  whereas “\*” denotes models with odds ratio  $\geq 1.0$ . Models assigned with “-” are neither enriched nor occur at higher rates in the original data. “Msl” = mean sequence length of module instances. Colored rows have an FDR  $\leq \hat{F}_{rnaz}$  and original window count  $\geq 6$ , and Msl  $\geq 9$ . The table is sorted in ascending order according to FDR.

| <b>p-score &gt; 0.9, 0.25 ≤ GC content ≤ 0.75</b> |            |            |         |            |       |     |
|---------------------------------------------------|------------|------------|---------|------------|-------|-----|
| ModelID                                           | # original | # shuffled | FDR (%) | Odds ratio | Stat. | Msl |
| $\hat{F}_{rnaz}$                                  | 142 475    | 66 891     | 46.9%   |            |       |     |
| IL_05513.1                                        | 2          | 0          | 0.000   | Inf        | *     | 12  |
| IL_39324.1                                        | 0          | 0          | 0.000   | 0.000      | -     | 20  |
| IL_40527.1                                        | 0          | 0          | 0.000   | 0.000      | -     | 16  |

Continued on next page

Table D – continued from previous page

| p-score > 0.9, 0.25 ≤ GC content ≤ 0.75 |            |            |         |            |       |      |
|-----------------------------------------|------------|------------|---------|------------|-------|------|
| ModelID                                 | # original | # shuffled | FDR (%) | Odds ratio | Stat. | Msl  |
| $\bar{F}_{rnaz}$                        | 142 475    | 66 891     | 46.9%   |            |       |      |
| IL_42891.1                              | 1          | 0          | 0.000   | Inf        | *     | 16   |
| IL_46435.1                              | 7          | 0          | 0.000   | Inf        | *     | 13   |
| IL_52610.1                              | 0          | 0          | 0.000   | 0.000      | -     | 37   |
| IL_76095.3                              | 0          | 0          | 0.000   | 0.000      | -     | 20   |
| IL_76263.1                              | 0          | 0          | 0.000   | 0.000      | -     | 19   |
| IL_77076.1                              | 0          | 0          | 0.000   | 0.000      | -     | 18   |
| IL_77296.1                              | 0          | 0          | 0.000   | 0.000      | -     | 15   |
| IL_06847.1                              | 7          | 0          | 0.000   | Inf        | *     | 13   |
| IL_88367.1                              | 0          | 0          | 0.000   | 0.000      | -     | 15   |
| IL_89028.6                              | 0          | 0          | 0.000   | 0.000      | -     | 16   |
| IL_90057.1                              | 0          | 0          | 0.000   | 0.000      | -     | 25   |
| IL_94744.1                              | 2          | 0          | 0.000   | Inf        | *     | 17   |
| IL_97842.1                              | 0          | 0          | 0.000   | 0.000      | -     | 16   |
| IL_98655.1                              | 0          | 0          | 0.000   | 0.000      | -     | 16   |
| IL_02359.3                              | 0          | 0          | 0.000   | 0.000      | -     | 17.6 |
| IL_16330.1                              | 0          | 0          | 0.000   | 0.000      | -     | 28   |
| IL_21421.1                              | 0          | 0          | 0.000   | 0.000      | -     | 20   |
| IL_21495.1                              | 1          | 0          | 0.000   | 0.000      | -     | 15   |
| IL_23414.1                              | 0          | 0          | 0.000   | 0.000      | -     | 21   |
| IL_25082.1                              | 2          | 0          | 0.000   | Inf        | *     | 18   |
| IL_25230.3                              | 0          | 0          | 0.000   | 0.000      | -     | 18   |
| IL_27668.1                              | 2          | 0          | 0.000   | Inf        | *     | 12   |
| IL_28572.2                              | 7          | 0          | 0.000   | Inf        | *     | 16   |
| IL_33964.1                              | 0          | 0          | 0.000   | 0.000      | -     | 23   |
| IL_80505.1                              | 11         | 1          | 9.091   | 4.337      | *     | 11   |
| IL_34628.2                              | 83         | 11         | 13.253  | 2.785      | +     | 13   |
| IL_39526.4                              | 7          | 1          | 14.286  | 2.891      | *     | 9    |
| IL_63133.1                              | 58         | 9          | 15.517  | 3.193      | +     | 6    |
| IL_98591.3                              | 6          | 1          | 16.667  | 2.409      | *     | 16   |
| IL_23448.1                              | 95         | 16         | 16.842  | 3.301      | +     | 6    |
| IL_61730.1                              | 28         | 5          | 17.857  | 2.313      | *     | 11   |
| IL_41791.1                              | 104        | 20         | 19.231  | 1.776      | *     | 12   |
| IL_21639.1                              | 52         | 10         | 19.231  | 2.356      | +     | 9    |
| IL_86357.3                              | 85         | 17         | 20.000  | 2.380      | +     | 6    |
| IL_57364.1                              | 28         | 6          | 21.429  | 2.506      | *     | 8    |
| IL_96206.3                              | 326        | 72         | 22.086  | 2.260      | +     | 6    |
| IL_73000.2                              | 282        | 63         | 22.340  | 2.269      | +     | 6.57 |
| IL_28644.1                              | 169        | 38         | 22.485  | 2.280      | +     | 6    |
| IL_58291.4                              | 137        | 31         | 22.628  | 2.411      | +     | 6    |
| IL_34363.2                              | 22         | 5          | 22.727  | 2.289      | *     | 14   |
| IL_54450.1                              | 48         | 11         | 22.917  | 1.796      | *     | 8    |
| IL_06177.1                              | 43         | 10         | 23.256  | 1.928      | *     | 6    |
| IL_69799.1                              | 128        | 30         | 23.438  | 2.276      | +     | 6    |
| IL_73276.5                              | 223        | 54         | 24.215  | 1.973      | +     | 8.18 |

Continued on next page

Table D – continued from previous page

| p-score > 0.9, 0.25 ≤ GC content ≤ 0.75 |            |            |         |            |       |       |
|-----------------------------------------|------------|------------|---------|------------|-------|-------|
| ModelID                                 | # original | # shuffled | FDR (%) | Odds ratio | Stat. | Msl   |
| $\hat{F}_{rnaz}$                        | 142 475    | 66 891     | 46.9%   |            |       |       |
| IL_43877.1                              | 94         | 23         | 24.468  | 1.802      | +     | 7.5   |
| IL_70173.1                              | 192        | 48         | 25.000  | 1.951      | +     | 7.5   |
| IL_71942.1                              | 12         | 3          | 25.000  | 1.285      | *     | 10    |
| IL_75415.1                              | 8          | 2          | 25.000  | 0.964      | -     | 10    |
| IL_77014.1                              | 4          | 1          | 25.000  | Inf        | *     | 11    |
| IL_85647.3                              | 16         | 4          | 25.000  | 1.687      | *     | 15.06 |
| IL_91089.1                              | 48         | 12         | 25.000  | 2.685      | +     | 8     |
| IL_31066.3                              | 44         | 11         | 25.000  | 1.928      | *     | 7     |
| IL_92027.3                              | 174        | 44         | 25.287  | 2.007      | +     | 6.24  |
| IL_92027.3                              | 174        | 44         | 25.287  | 2.007      | +     | 6.24  |
| IL_87065.1                              | 152        | 39         | 25.658  | 1.725      | +     | 7     |
| IL_98421.4                              | 128        | 33         | 25.781  | 1.712      | +     | 7     |
| IL_28947.2                              | 358        | 93         | 25.978  | 1.913      | +     | 5.45  |
| IL_67887.1                              | 238        | 62         | 26.050  | 1.850      | +     | 6.5   |
| IL_37406.1                              | 99         | 26         | 26.263  | 1.797      | +     | 8.5   |
| IL_58586.2                              | 342        | 90         | 26.316  | 1.855      | +     | 7     |
| IL_99397.1                              | 19         | 5          | 26.316  | 1.542      | *     | 9     |
| IL_37325.1                              | 53         | 14         | 26.415  | 2.008      | *     | 7     |
| IL_98566.1                              | 102        | 27         | 26.471  | 1.581      | *     | 9     |
| IL_44540.4                              | 234        | 62         | 26.496  | 1.815      | +     | 5.3   |
| IL_06808.1                              | 105        | 28         | 26.667  | 1.619      | *     | 9     |
| IL_97217.11                             | 386        | 103        | 26.684  | 1.809      | +     | 5.14  |
| IL_40845.1                              | 212        | 57         | 26.887  | 1.728      | +     | 8     |
| IL_39199.4                              | 297        | 80         | 26.936  | 1.802      | +     | 5.28  |
| IL_39980.1                              | 122        | 33         | 27.049  | 1.785      | +     | 8     |
| IL_41153.1                              | 33         | 9          | 27.273  | 1.499      | *     | 8     |
| IL_91379.1                              | 11         | 3          | 27.273  | 2.168      | *     | 12    |
| IL_11751.1                              | 44         | 12         | 27.273  | 1.446      | *     | 7     |
| IL_43946.1                              | 18         | 5          | 27.778  | 1.566      | *     | 12    |
| IL_25300.3                              | 320        | 89         | 27.812  | 1.721      | +     | 5.29  |
| IL_46648.6                              | 248        | 69         | 27.823  | 1.727      | +     | 5.62  |
| IL_50911.1                              | 39         | 11         | 28.205  | 1.767      | *     | 8     |
| IL_47875.1                              | 567        | 160        | 28.219  | 1.770      | +     | 7.67  |
| IL_92109.3                              | 587        | 166        | 28.279  | 1.687      | +     | 6.07  |
| IL_31039.1                              | 67         | 19         | 28.358  | 1.673      | *     | 7     |
| IL_94430.5                              | 396        | 113        | 28.535  | 1.670      | +     | 5.94  |
| IL_56465.4                              | 526        | 153        | 29.087  | 1.583      | +     | 5.74  |
| IL_50521.1                              | 61         | 18         | 29.508  | 1.417      | *     | 15    |
| IL_31663.1                              | 115        | 34         | 29.565  | 1.461      | *     | 7.5   |
| IL_01080.1                              | 229        | 68         | 29.694  | 1.672      | +     | 8     |
| IL_15205.1                              | 151        | 45         | 29.801  | 1.410      | *     | 13    |
| IL_56513.1                              | 114        | 34         | 29.825  | 1.416      | *     | 9     |
| IL_82444.1                              | 197        | 59         | 29.949  | 1.455      | +     | 6.59  |
| IL_20775.1                              | 70         | 21         | 30.000  | 1.492      | *     | 8     |

Continued on next page

Table D – continued from previous page

| p-score > 0.9, 0.25 ≤ GC content ≤ 0.75 |            |            |         |            |       |       |
|-----------------------------------------|------------|------------|---------|------------|-------|-------|
| ModelID                                 | # original | # shuffled | FDR (%) | Odds ratio | Stat. | Msl   |
| $\hat{F}_{rnaz}$                        | 142 475    | 66 891     | 46.9%   |            |       |       |
| IL_63253.1                              | 103        | 31         | 30.097  | 1.755      | +     | 7     |
| IL_13069.3                              | 96         | 29         | 30.208  | 1.346      | *     | 8     |
| IL_68767.1                              | 109        | 33         | 30.275  | 1.722      | +     | 6     |
| IL_09491.1                              | 36         | 11         | 30.556  | 1.494      | *     | 8     |
| IL_17212.2                              | 241        | 74         | 30.705  | 1.420      | +     | 6.73  |
| IL_41139.1                              | 65         | 20         | 30.769  | 1.420      | *     | 8     |
| IL_25271.2                              | 29         | 9          | 31.034  | 2.088      | *     | 15    |
| IL_86059.1                              | 119        | 37         | 31.092  | 1.578      | +     | 7     |
| IL_18675.1                              | 106        | 33         | 31.132  | 1.625      | *     | 7     |
| IL_80348.3                              | 202        | 63         | 31.188  | 1.573      | +     | 6.33  |
| IL_21254.1                              | 51         | 16         | 31.373  | 1.274      | *     | 14    |
| IL_88119.1                              | 205        | 65         | 31.707  | 1.487      | +     | 8     |
| IL_47732.1                              | 22         | 7          | 31.818  | 1.239      | *     | 9     |
| IL_17066.1                              | 72         | 23         | 31.944  | 1.404      | *     | 6     |
| IL_31006.1                              | 225        | 72         | 32.000  | 1.394      | +     | 12    |
| IL_02809.3                              | 286        | 92         | 32.168  | 1.614      | +     | 9.11  |
| IL_21333.2                              | 301        | 97         | 32.226  | 1.522      | +     | 9.5   |
| IL_13777.1                              | 124        | 40         | 32.258  | 1.510      | *     | 5     |
| IL_16166.4                              | 145        | 47         | 32.414  | 1.457      | *     | 5     |
| IL_47174.11                             | 305        | 99         | 32.459  | 1.421      | +     | 6.2   |
| IL_95150.6                              | 80         | 26         | 32.500  | 1.663      | *     | 8.33  |
| IL_12147.1                              | 223        | 73         | 32.735  | 1.461      | +     | 6.5   |
| IL_37104.3                              | 230        | 76         | 33.043  | 1.368      | *     | 7.36  |
| IL_42251.1                              | 217        | 72         | 33.180  | 1.446      | +     | 7     |
| IL_37347.1                              | 18         | 6          | 33.333  | 1.349      | *     | 16    |
| IL_57785.5                              | 57         | 19         | 33.333  | 1.389      | *     | 9     |
| IL_86981.1                              | 3          | 1          | 33.333  | 0.964      | -     | 15    |
| IL_35043.1                              | 6          | 2          | 33.333  | 1.446      | *     | 11    |
| IL_23262.4                              | 563        | 189        | 33.570  | 1.451      | +     | 11    |
| IL_71685.1                              | 95         | 32         | 33.684  | 1.205      | *     | 14    |
| IL_90133.3                              | 168        | 57         | 33.929  | 1.328      | *     | 8     |
| IL_69106.1                              | 215        | 73         | 33.953  | 1.348      | *     | 8.5   |
| IL_13959.4                              | 185        | 63         | 34.054  | 1.377      | *     | 8.23  |
| IL_46721.1                              | 108        | 37         | 34.259  | 1.670      | +     | 11    |
| IL_80494.2                              | 613        | 213        | 34.747  | 1.301      | +     | 12.67 |
| IL_90459.3                              | 551        | 192        | 34.846  | 1.310      | +     | 7.56  |
| IL_79083.3                              | 831        | 291        | 35.018  | 1.337      | +     | 11    |
| IL_30381.1                              | 73         | 26         | 35.616  | 1.404      | *     | 8.5   |
| IL_39355.1                              | 420        | 150        | 35.714  | 1.259      | *     | 9     |
| IL_11778.1                              | 39         | 14         | 35.897  | 1.260      | *     | 8     |
| IL_63952.1                              | 633        | 228        | 36.019  | 1.306      | +     | 13    |
| IL_43316.1                              | 1053       | 380        | 36.087  | 1.267      | +     | 11    |
| IL_55938.4                              | 347        | 126        | 36.311  | 1.290      | +     | 7.56  |
| IL_87394.1                              | 33         | 12         | 36.364  | 1.004      | *     | 10    |

Continued on next page

Table D – continued from previous page

| p-score > 0.9, 0.25 ≤ GC content ≤ 0.75 |            |            |         |            |       |       |
|-----------------------------------------|------------|------------|---------|------------|-------|-------|
| ModelID                                 | # original | # shuffled | FDR (%) | Odds ratio | Stat. | Msl   |
| $\hat{F}_{rnaz}$                        | 142 475    | 66 891     | 46.9%   |            |       |       |
| IL_22909.1                              | 118        | 43         | 36.441  | 1.281      | *     | 9     |
| IL_87507.1                              | 263        | 96         | 36.502  | 1.156      | *     | 9.5   |
| IL_06421.1                              | 123        | 45         | 36.585  | 1.139      | *     | 8     |
| IL_55649.1                              | 467        | 171        | 36.617  | 1.251      | +     | 9     |
| IL_47758.2                              | 131        | 48         | 36.641  | 1.230      | *     | 8.5   |
| IL_97296.1                              | 242        | 89         | 36.777  | 1.223      | *     | 8.5   |
| IL_08926.3                              | 116        | 43         | 37.069  | 1.253      | *     | 5.5   |
| IL_87904.5                              | 1444       | 538        | 37.258  | 1.263      | +     | 10    |
| IL_43124.2                              | 198        | 74         | 37.374  | 1.165      | *     | 7.09  |
| IL_05684.1                              | 269        | 101        | 37.546  | 1.265      | *     | 9     |
| IL_83856.1                              | 669        | 252        | 37.668  | 1.313      | +     | 12    |
| IL_57977.1                              | 90         | 34         | 37.778  | 1.092      | *     | 11    |
| IL_74876.2                              | 1061       | 401        | 37.795  | 1.274      | +     | 10.67 |
| IL_64589.1                              | 66         | 25         | 37.879  | 1.354      | *     | 8     |
| IL_88865.1                              | 29         | 11         | 37.931  | 1.339      | *     | 9     |
| IL_65553.8                              | 134        | 51         | 38.060  | 1.294      | *     | 13.3  |
| IL_12211.1                              | 155        | 59         | 38.065  | 1.323      | *     | 13.5  |
| IL_83920.1                              | 68         | 26         | 38.235  | 1.157      | *     | 7     |
| IL_41766.6                              | 387        | 148        | 38.243  | 1.223      | *     | 8.26  |
| IL_00998.1                              | 115        | 44         | 38.261  | 1.303      | *     | 8     |
| IL_70401.1                              | 13         | 5          | 38.462  | 1.205      | *     | 11    |
| IL_06471.1                              | 611        | 235        | 38.462  | 1.194      | *     | 10    |
| IL_24982.5                              | 1673       | 650        | 38.852  | 1.207      | *     | 10    |
| IL_26971.1                              | 1049       | 409        | 38.990  | 1.193      | *     | 11    |
| IL_15840.2                              | 889        | 350        | 39.370  | 1.158      | *     | 11    |
| IL_77263.2                              | 360        | 142        | 39.444  | 1.119      | *     | 11    |
| IL_93568.2                              | 250        | 99         | 39.600  | 1.173      | *     | 12.5  |
| IL_06211.3                              | 159        | 63         | 39.623  | 1.233      | *     | 9.33  |
| IL_37197.1                              | 817        | 324        | 39.657  | 1.179      | *     | 11    |
| IL_80093.1                              | 781        | 311        | 39.821  | 1.193      | *     | 11    |
| IL_85510.1                              | 873        | 348        | 39.863  | 1.140      | *     | 11    |
| IL_82650.1                              | 15         | 6          | 40.000  | 0.803      | -     | 13    |
| IL_97509.1                              | 921        | 369        | 40.065  | 1.137      | *     | 10.5  |
| IL_24546.4                              | 172        | 69         | 40.116  | 1.182      | *     | 10    |
| IL_39585.1                              | 1269       | 511        | 40.268  | 1.177      | *     | 12    |
| IL_93424.4                              | 781        | 315        | 40.333  | 1.135      | *     | 10.19 |
| IL_22732.1                              | 210        | 85         | 40.476  | 1.133      | *     | 9     |
| IL_80714.1                              | 578        | 234        | 40.484  | 1.172      | *     | 12    |
| IL_70237.3                              | 1128       | 459        | 40.691  | 1.164      | *     | 10    |
| IL_45794.1                              | 54         | 22         | 40.741  | 1.012      | *     | 14    |
| IL_05723.1                              | 594        | 243        | 40.909  | 1.187      | *     | 10    |
| IL_97191.1                              | 17         | 7          | 41.176  | 1.124      | *     | 13    |
| IL_78513.1                              | 29         | 12         | 41.379  | 0.876      | -     | 10    |
| IL_53635.3                              | 123        | 51         | 41.463  | 1.248      | *     | 13    |

Continued on next page

Table D – continued from previous page

| p-score > 0.9, 0.25 ≤ GC content ≤ 0.75 |            |            |         |            |       |       |
|-----------------------------------------|------------|------------|---------|------------|-------|-------|
| ModelID                                 | # original | # shuffled | FDR (%) | Odds ratio | Stat. | Msl   |
| $\bar{F}_{rnaz}$                        | 142 475    | 66 891     | 46.9%   |            |       |       |
| IL_87548.1                              | 523        | 217        | 41.491  | 1.140      | *     | 11.5  |
| IL_25380.1                              | 200        | 83         | 41.500  | 1.134      | *     | 8.33  |
| IL_11302.1                              | 1098       | 457        | 41.621  | 1.062      | *     | 10    |
| IL_69536.1                              | 1367       | 569        | 41.624  | 1.149      | *     | 10    |
| IL_75328.1                              | 24         | 10         | 41.667  | 1.446      | *     | 14    |
| IL_47444.3                              | 956        | 399        | 41.736  | 1.087      | *     | 12    |
| IL_79955.2                              | 448        | 187        | 41.741  | 1.149      | *     | 12.67 |
| IL_70299.1                              | 98         | 41         | 41.837  | 1.176      | *     | 14    |
| IL_31224.1                              | 365        | 153        | 41.918  | 1.039      | *     | 10    |
| IL_09587.1                              | 3384       | 1419       | 41.933  | 1.098      | *     | 11.5  |
| IL_46306.1                              | 1464       | 616        | 42.077  | 1.079      | *     | 10    |
| IL_16415.2                              | 19         | 8          | 42.105  | 0.903      | -     | 15    |
| IL_45262.4                              | 178        | 75         | 42.135  | 1.090      | *     | 9.25  |
| IL_09333.1                              | 388        | 164        | 42.268  | 1.107      | *     | 13    |
| IL_07300.2                              | 149        | 63         | 42.282  | 1.098      | *     | 9.33  |
| IL_21077.1                              | 208        | 88         | 42.308  | 1.022      | *     | 10    |
| IL_52509.1                              | 638        | 270        | 42.320  | 1.027      | *     | 10    |
| IL_31555.5                              | 763        | 328        | 42.988  | 1.085      | *     | 9.23  |
| IL_86336.1                              | 361        | 156        | 43.213  | 1.014      | *     | 10    |
| IL_23639.1                              | 1448       | 626        | 43.232  | 1.078      | *     | 10    |
| IL_06468.1                              | 322        | 140        | 43.478  | 1.078      | *     | 11    |
| IL_09530.1                              | 812        | 354        | 43.596  | 1.065      | *     | 11.5  |
| IL_58454.1                              | 728        | 318        | 43.681  | 1.093      | *     | 10    |
| IL_17603.1                              | 428        | 187        | 43.692  | 1.195      | *     | 12    |
| IL_46034.3                              | 98         | 43         | 43.878  | 0.988      | -     | 9     |
| IL_54966.1                              | 341        | 150        | 43.988  | 1.037      | *     | 9     |
| IL_91044.1                              | 412        | 182        | 44.175  | 1.061      | *     | 11    |
| IL_06180.1                              | 1141       | 507        | 44.435  | 1.049      | *     | 10.67 |
| IL_59529.1                              | 614        | 275        | 44.788  | 1.086      | *     | 11    |
| IL_82563.1                              | 60         | 27         | 45.000  | 0.964      | -     | 10    |
| IL_52958.1                              | 3265       | 1470       | 45.023  | 1.049      | *     | 10    |
| IL_52173.1                              | 199        | 90         | 45.226  | 1.043      | *     | 9     |
| IL_24293.1                              | 86         | 39         | 45.349  | 0.964      | -     | 8.5   |
| IL_54470.1                              | 443        | 201        | 45.372  | 0.972      | -     | 9     |
| IL_49493.4                              | 139        | 64         | 46.043  | 0.991      | -     | 13    |
| IL_38807.3                              | 76         | 35         | 46.053  | 1.131      | *     | 12.75 |
| IL_30067.1                              | 340        | 157        | 46.176  | 1.072      | *     | 10    |
| IL_46301.1                              | 300        | 139        | 46.333  | 1.023      | *     | 9.43  |
| IL_03110.1                              | 455        | 211        | 46.374  | 1.008      | *     | 13    |
| IL_26868.1                              | 483        | 224        | 46.377  | 1.004      | *     | 11    |
| IL_33842.1                              | 28         | 13         | 46.429  | 1.004      | *     | 9     |
| IL_97057.3                              | 858        | 399        | 46.503  | 1.051      | *     | 11.83 |
| IL_81398.1                              | 3957       | 1861       | 47.031  | 1.010      | *     | 10    |
| IL_82188.2                              | 270        | 127        | 47.037  | 0.950      | -     | 14    |

Continued on next page

Table D – continued from previous page

| p-score > 0.9, 0.25 ≤ GC content ≤ 0.75 |            |            |         |            |       |       |
|-----------------------------------------|------------|------------|---------|------------|-------|-------|
| ModelID                                 | # original | # shuffled | FDR (%) | Odds ratio | Stat. | Msl   |
| $\bar{F}_{rnaz}$                        | 142 475    | 66 891     | 46.9%   |            |       |       |
| IL_53988.1                              | 123        | 58         | 47.154  | 0.944      | -     | 13    |
| IL_98924.1                              | 515        | 243        | 47.184  | 0.923      | -     | 10    |
| IL_06306.1                              | 38         | 18         | 47.368  | 1.297      | *     | 14    |
| IL_92321.4                              | 584        | 278        | 47.603  | 0.972      | -     | 12.14 |
| IL_95652.3                              | 42         | 20         | 47.619  | 0.964      | -     | 14    |
| IL_78744.1                              | 23         | 11         | 47.826  | 1.377      | *     | 12    |
| IL_87523.1                              | 166        | 80         | 48.193  | 0.979      | -     | 11    |
| IL_03282.1                              | 145        | 70         | 48.276  | 0.937      | -     | 10    |
| IL_96446.1                              | 147        | 71         | 48.299  | 0.877      | -     | 11    |
| IL_12507.1                              | 93         | 45         | 48.387  | 0.940      | -     | 13    |
| IL_28003.1                              | 66         | 32         | 48.485  | 1.067      | *     | 8.67  |
| IL_62499.7                              | 573        | 278        | 48.517  | 0.922      | -     | 11    |
| IL_65137.1                              | 111        | 54         | 48.649  | 0.953      | -     | 13    |
| IL_53323.1                              | 1227       | 597        | 48.655  | 0.934      | -     | 10    |
| IL_85805.1                              | 1139       | 555        | 48.727  | 0.988      | -     | 9     |
| IL_49527.1                              | 912        | 445        | 48.794  | 0.992      | -     | 10    |
| IL_46990.1                              | 2143       | 1051       | 49.043  | 0.974      | -     | 12.5  |
| IL_30840.2                              | 2864       | 1411       | 49.267  | 0.959      | -     | 11.33 |
| IL_48918.3                              | 91         | 45         | 49.451  | 0.951      | -     | 13    |
| IL_37053.1                              | 304        | 151        | 49.671  | 0.972      | -     | 13.67 |
| IL_72158.3                              | 167        | 83         | 49.701  | 0.934      | -     | 13    |
| IL_80652.1                              | 18         | 9          | 50.000  | 1.033      | *     | 14    |
| IL_82601.1                              | 2          | 1          | 50.000  | Inf        | *     | 8     |
| IL_94403.5                              | 2          | 1          | 50.000  | Inf        | *     | 12.75 |
| IL_09882.1                              | 130        | 65         | 50.000  | 1.082      | *     | 12    |
| IL_02835.1                              | 4          | 2          | 50.000  | 1.927      | *     | 13    |
| IL_27640.1                              | 2          | 1          | 50.000  | 0.964      | -     | 15    |
| IL_66744.1                              | 92         | 47         | 51.087  | 0.846      | -     | 14    |
| IL_83250.1                              | 148        | 76         | 51.351  | 1.018      | *     | 11    |
| IL_25307.1                              | 70         | 37         | 52.857  | 0.812      | -     | 9     |
| IL_40892.1                              | 117        | 62         | 52.991  | 1.029      | *     | 11    |
| IL_25181.1                              | 1266       | 673        | 53.160  | 0.916      | -     | 13    |
| IL_91078.1                              | 15         | 8          | 53.333  | 0.964      | -     | 14    |
| IL_49976.1                              | 1271       | 693        | 54.524  | 0.857      | -     | 13    |
| IL_92114.3                              | 79         | 44         | 55.696  | 0.902      | -     | 9     |
| IL_97833.1                              | 34         | 19         | 55.882  | 1.038      | *     | 14    |
| IL_60649.1                              | 53         | 30         | 56.604  | 0.803      | -     | 13    |
| IL_31754.1                              | 7          | 4          | 57.143  | 0.723      | -     | 13    |
| IL_59934.1                              | 96         | 55         | 57.292  | 0.880      | -     | 13    |
| IL_47687.1                              | 293        | 168        | 57.338  | 0.855      | -     | 14    |
| IL_89794.1                              | 28         | 17         | 60.714  | 0.860      | -     | 14    |
| IL_52940.1                              | 272        | 167        | 61.397  | 0.855      | -     | 15.5  |
| IL_44067.4                              | 16         | 10         | 62.500  | 0.723      | -     | 14    |
| IL_54954.1                              | 3          | 2          | 66.667  | 1.446      | *     | 17    |

Continued on next page



**Table D – continued from previous page**

| <b>p-score &gt; 0.9, 0.25 ≤ GC content ≤ 0.75</b> |            |            |         |            |       |     |
|---------------------------------------------------|------------|------------|---------|------------|-------|-----|
| ModelID                                           | # original | # shuffled | FDR (%) | Odds ratio | Stat. | Msl |
| $\hat{F}_{rnaz}$                                  | 142 475    | 66 891     | 46.9%   |            |       |     |
| IL_76486.1                                        | 3          | 2          | 66.667  | 0.723      | -     | 15  |
| IL_94973.1                                        | 18         | 12         | 66.667  | 0.569      | -     | 14  |
| IL_31707.1                                        | 12         | 8          | 66.667  | 0.642      | -     | 11  |
| IL_68827.1                                        | 38         | 27         | 71.053  | 0.545      | -     | 11  |
| IL_05221.1                                        | 4          | 3          | 75.000  | 0.482      | -     | 17  |
| IL_17682.1                                        | 1          | 1          | 100.000 | 0.000      | -     | 17  |
| IL_90735.1                                        | 20         | 21         | 105.000 | 0.578      | -     | 17  |
| IL_27243.1                                        | 2          | 3          | 150.000 | 0.241      | -     | 15  |
| IL_57285.1                                        | 0          | 1          | Inf     | 0.000      | -     | 13  |
| IL_91904.1                                        | 0          | 1          | Inf     | 0.000      | -     | 17  |

Table E: False discovery rates (FDR) for individual JAR3D HL models with mean interior edit distance  $\leq 4$  and passed cutoff  $\geq 50$  in windows with p-score  $> 0.9$  and  $0.25 \leq \text{GC content} \leq 0.75$  of order L. Status “+” denotes models with adjusted p-value  $\leq 0.05$  and odds ratio  $\geq 1.0$  whereas “\*” denotes models with odds ratio  $\geq 1.0$ . Models assigned with “-” are neither enriched nor occur at higher rates in the original data. Colored rows have an  $\text{FDR} \leq \hat{F}_{rnaz}$  and original window count  $\geq 6$ . The table is sorted in ascending order according to FDR.

| <b>p-score <math>&gt; 0.9</math>, <math>0.25 \leq \text{GC content} \leq 0.75</math></b> |            |            |         |            |       |
|------------------------------------------------------------------------------------------|------------|------------|---------|------------|-------|
| ModelID                                                                                  | # original | # shuffled | FDR (%) | Odds ratio | Stat. |
| $\hat{F}_{rnaz}$                                                                         | 142 490    | 66 891     | 46.9%   |            |       |
| HL_45358.1                                                                               | 0          | 0          | 0.000   | 0.000      | -     |
| HL_10116.1                                                                               | 0          | 0          | 0.000   | 0.000      | -     |
| HL_70420.2                                                                               | 1          | 0          | 0.000   | 0.000      | -     |
| HL_90102.1                                                                               | 0          | 0          | 0.000   | 0.000      | -     |
| HL_19399.1                                                                               | 0          | 0          | 0.000   | 0.000      | -     |
| HL_24473.3                                                                               | 5          | 0          | 0.000   | Inf        | *     |
| HL_42436.1                                                                               | 2          | 0          | 0.000   | Inf        | *     |
| HL_33451.1                                                                               | 11         | 1          | 9.091   | 3.898      | *     |
| HL_73465.1                                                                               | 36         | 5          | 13.889  | 3.411      | *     |
| HL_44467.1                                                                               | 50         | 11         | 22.000  | 1.684      | *     |
| HL_20920.1                                                                               | 13         | 3          | 23.077  | 1.299      | *     |
| HL_44390.1                                                                               | 25         | 6          | 24.000  | 1.267      | *     |
| HL_55202.1                                                                               | 16         | 4          | 25.000  | 2.274      | *     |
| HL_25175.1                                                                               | 8          | 2          | 25.000  | 1.949      | *     |
| HL_56809.1                                                                               | 114        | 36         | 31.579  | 1.310      | *     |
| HL_05361.1                                                                               | 743        | 253        | 34.051  | 1.398      | +     |
| HL_87223.1                                                                               | 213        | 73         | 34.272  | 1.044      | *     |
| HL_66877.1                                                                               | 213        | 78         | 36.620  | 1.275      | *     |
| HL_65071.1                                                                               | 1260       | 463        | 36.746  | 1.244      | *     |
| HL_90542.1                                                                               | 1233       | 455        | 36.902  | 1.363      | +     |
| HL_26579.1                                                                               | 866        | 320        | 36.952  | 1.221      | *     |
| HL_87554.1                                                                               | 2392       | 888        | 37.124  | 1.279      | +     |
| HL_98833.3                                                                               | 1041       | 388        | 37.272  | 1.135      | *     |
| HL_68435.1                                                                               | 1152       | 437        | 37.934  | 1.182      | *     |
| HL_45018.3                                                                               | 1132       | 438        | 38.693  | 1.175      | *     |
| HL_08203.1                                                                               | 62         | 24         | 38.710  | 1.276      | *     |
| HL_75759.4                                                                               | 7326       | 2838       | 38.739  | 1.204      | *     |
| HL_05113.1                                                                               | 103        | 40         | 38.835  | 1.310      | *     |
| HL_13707.2                                                                               | 95         | 37         | 38.947  | 1.109      | *     |
| HL_97499.1                                                                               | 2601       | 1018       | 39.139  | 1.200      | *     |
| HL_30008.1                                                                               | 2609       | 1025       | 39.287  | 1.193      | *     |
| HL_74559.1                                                                               | 3522       | 1392       | 39.523  | 1.179      | *     |
| HL_00721.1                                                                               | 1804       | 713        | 39.523  | 1.129      | *     |
| HL_35865.1                                                                               | 7511       | 2972       | 39.569  | 1.173      | *     |

Continued on next page

Table E – continued from previous page

| p-score > 0.9, 0.25 ≤ GC content ≤ 0.75 |            |            |         |            |       |
|-----------------------------------------|------------|------------|---------|------------|-------|
| ModelID                                 | # original | # shuffled | FDR (%) | Odds ratio | Stat. |
| $\hat{F}_{rnaz}$                        | 142 490    | 66 891     | 46.9%   |            |       |
| HL_27429.3                              | 308        | 122        | 39.610  | 1.046      | *     |
| HL_10378.1                              | 2055       | 821        | 39.951  | 1.211      | *     |
| HL_17723.4                              | 2345       | 937        | 39.957  | 1.137      | *     |
| HL_17790.1                              | 2862       | 1150       | 40.182  | 1.126      | *     |
| HL_78420.1                              | 700        | 282        | 40.286  | 1.138      | *     |
| HL_06643.3                              | 6962       | 2807       | 40.319  | 1.153      | *     |
| HL_59225.1                              | 2680       | 1084       | 40.448  | 1.138      | *     |
| HL_24711.1                              | 940        | 381        | 40.532  | 1.118      | *     |
| HL_35619.2                              | 1943       | 788        | 40.556  | 1.152      | *     |
| HL_59604.1                              | 2831       | 1149       | 40.586  | 1.152      | *     |
| HL_42969.1                              | 32         | 13         | 40.625  | 1.063      | *     |
| HL_46489.2                              | 1210       | 493        | 40.744  | 1.138      | *     |
| HL_01418.1                              | 1975       | 808        | 40.911  | 1.117      | *     |
| HL_44522.1                              | 214        | 88         | 41.121  | 1.151      | *     |
| HL_63304.1                              | 17         | 7          | 41.176  | 1.706      | *     |
| HL_42677.2                              | 5801       | 2390       | 41.200  | 1.126      | *     |
| HL_72273.1                              | 982        | 406        | 41.344  | 1.150      | *     |
| HL_74505.1                              | 5508       | 2283       | 41.449  | 1.121      | *     |
| HL_06997.2                              | 24         | 10         | 41.667  | 0.975      | -     |
| HL_27397.1                              | 470        | 196        | 41.702  | 1.149      | *     |
| HL_63941.1                              | 5720       | 2391       | 41.801  | 1.117      | *     |
| HL_33640.1                              | 849        | 356        | 41.932  | 1.034      | *     |
| HL_20028.1                              | 212        | 89         | 41.981  | 1.108      | *     |
| HL_41827.1                              | 1564       | 657        | 42.008  | 1.091      | *     |
| HL_24707.1                              | 2212       | 930        | 42.043  | 1.103      | *     |
| HL_15603.2                              | 107        | 45         | 42.056  | 1.042      | *     |
| HL_33277.1                              | 2065       | 872        | 42.228  | 1.095      | *     |
| HL_18587.1                              | 1039       | 440        | 42.348  | 1.155      | *     |
| HL_73972.1                              | 1192       | 505        | 42.366  | 1.100      | *     |
| HL_78361.1                              | 807        | 343        | 42.503  | 1.117      | *     |
| HL_57923.1                              | 329        | 140        | 42.553  | 1.104      | *     |
| HL_99207.1                              | 2260       | 968        | 42.832  | 1.161      | *     |
| HL_75850.1                              | 4857       | 2083       | 42.887  | 1.109      | *     |
| HL_99584.1                              | 1657       | 712        | 42.969  | 1.113      | *     |
| HL_00090.1                              | 923        | 397        | 43.012  | 1.167      | *     |
| HL_94578.1                              | 514        | 222        | 43.191  | 1.011      | *     |
| HL_52116.1                              | 1004       | 434        | 43.227  | 1.067      | *     |
| HL_34027.2                              | 9098       | 3939       | 43.295  | 1.078      | *     |
| HL_86115.1                              | 5084       | 2202       | 43.312  | 1.088      | *     |
| HL_03785.1                              | 4693       | 2036       | 43.384  | 1.090      | *     |
| HL_53789.1                              | 2750       | 1195       | 43.455  | 1.029      | *     |
| HL_53015.1                              | 729        | 318        | 43.621  | 1.069      | *     |
| HL_94697.1                              | 197        | 86         | 43.655  | 0.941      | -     |
| HL_48254.1                              | 1722       | 755        | 43.844  | 1.065      | *     |

Continued on next page

Table E – continued from previous page

| p-score > 0.9, 0.25 ≤ GC content ≤ 0.75 |            |            |         |            |       |
|-----------------------------------------|------------|------------|---------|------------|-------|
| ModelID                                 | # original | # shuffled | FDR (%) | Odds ratio | Stat. |
| $\hat{F}_{rnaz}$                        | 142 490    | 66 891     | 46.9%   |            |       |
| HL_65347.1                              | 660        | 290        | 43.939  | 1.020      | *     |
| HL_90579.3                              | 573        | 252        | 43.979  | 1.078      | *     |
| HL_66880.1                              | 75         | 33         | 44.000  | 1.111      | *     |
| HL_50312.1                              | 5464       | 2414       | 44.180  | 1.048      | *     |
| HL_30731.1                              | 1998       | 885        | 44.294  | 1.051      | *     |
| HL_82288.1                              | 731        | 324        | 44.323  | 1.025      | *     |
| HL_38138.1                              | 1110       | 494        | 44.505  | 1.089      | *     |
| HL_57217.1                              | 568        | 253        | 44.542  | 1.022      | *     |
| HL_93567.1                              | 2362       | 1053       | 44.581  | 1.032      | *     |
| HL_21675.3                              | 9426       | 4214       | 44.706  | 1.035      | *     |
| HL_36842.1                              | 2510       | 1123       | 44.741  | 1.069      | *     |
| HL_42094.1                              | 840        | 376        | 44.762  | 1.047      | *     |
| HL_30128.1                              | 1094       | 490        | 44.790  | 1.086      | *     |
| HL_78507.1                              | 2594       | 1163       | 44.834  | 1.060      | *     |
| HL_33875.1                              | 844        | 379        | 44.905  | 1.061      | *     |
| HL_74465.5                              | 1120       | 504        | 45.000  | 1.023      | *     |
| HL_66174.1                              | 1235       | 556        | 45.020  | 1.050      | *     |
| HL_68081.3                              | 1979       | 892        | 45.073  | 1.015      | *     |
| HL_23182.1                              | 1482       | 668        | 45.074  | 1.061      | *     |
| HL_34108.2                              | 12333      | 5559       | 45.074  | 1.031      | *     |
| HL_91872.1                              | 570        | 257        | 45.088  | 1.068      | *     |
| HL_97270.3                              | 3454       | 1558       | 45.107  | 1.036      | *     |
| HL_75579.2                              | 19715      | 8899       | 45.138  | 1.041      | *     |
| HL_42077.2                              | 18433      | 8321       | 45.142  | 1.036      | *     |
| HL_17008.1                              | 31         | 14         | 45.161  | 1.365      | *     |
| HL_57514.2                              | 11526      | 5219       | 45.280  | 1.062      | *     |
| HL_42345.1                              | 1325       | 601        | 45.358  | 1.067      | *     |
| HL_12706.1                              | 2034       | 923        | 45.379  | 1.003      | *     |
| HL_93530.1                              | 1236       | 561        | 45.388  | 1.045      | *     |
| HL_98523.2                              | 6011       | 2731       | 45.433  | 1.059      | *     |
| HL_74686.1                              | 332        | 151        | 45.482  | 1.064      | *     |
| HL_48116.2                              | 11093      | 5047       | 45.497  | 1.041      | *     |
| HL_58601.1                              | 4685       | 2132       | 45.507  | 1.035      | *     |
| HL_62970.1                              | 303        | 138        | 45.545  | 1.045      | *     |
| HL_58083.2                              | 369        | 169        | 45.799  | 0.949      | -     |
| HL_13786.1                              | 3601       | 1652       | 45.876  | 0.983      | -     |
| HL_96915.1                              | 768        | 353        | 45.964  | 1.015      | *     |
| HL_29196.1                              | 774        | 356        | 45.995  | 0.948      | -     |
| HL_18156.2                              | 332        | 153        | 46.084  | 1.082      | *     |
| HL_85044.1                              | 26         | 12         | 46.154  | 0.930      | -     |
| HL_48039.2                              | 22797      | 10524      | 46.164  | 1.026      | *     |
| HL_65249.1                              | 11042      | 5100       | 46.187  | 0.998      | -     |
| HL_19905.3                              | 9818       | 4537       | 46.211  | 1.038      | *     |
| HL_84888.1                              | 558        | 258        | 46.237  | 1.070      | *     |

Continued on next page

Table E – continued from previous page

| p-score > 0.9, 0.25 ≤ GC content ≤ 0.75 |            |            |         |            |       |
|-----------------------------------------|------------|------------|---------|------------|-------|
| ModelID                                 | # original | # shuffled | FDR (%) | Odds ratio | Stat. |
| $\bar{F}_{rnaz}$                        | 142 490    | 66 891     | 46.9%   |            |       |
| HL_19226.1                              | 679        | 315        | 46.392  | 0.997      | -     |
| HL_95716.1                              | 7023       | 3269       | 46.547  | 1.039      | *     |
| HL_62967.1                              | 11991      | 5598       | 46.685  | 1.000      | -     |
| HL_11376.1                              | 30015      | 14026      | 46.730  | 0.999      | -     |
| HL_82538.1                              | 26675      | 12472      | 46.755  | 0.989      | -     |
| HL_11509.2                              | 538        | 253        | 47.026  | 0.972      | -     |
| HL_62880.1                              | 3923       | 1849       | 47.132  | 0.987      | -     |
| HL_72543.2                              | 388        | 183        | 47.165  | 1.007      | *     |
| HL_78731.1                              | 1108       | 523        | 47.202  | 1.014      | *     |
| HL_68697.2                              | 15254      | 7222       | 47.345  | 0.974      | -     |
| HL_28676.1                              | 1742       | 828        | 47.532  | 0.998      | -     |
| HL_80459.3                              | 18699      | 8913       | 47.666  | 0.976      | -     |
| HL_76679.1                              | 4534       | 2163       | 47.706  | 0.969      | -     |
| HL_21545.1                              | 2793       | 1334       | 47.762  | 0.991      | -     |
| HL_87844.2                              | 2929       | 1399       | 47.764  | 0.969      | -     |
| HL_82294.3                              | 3643       | 1741       | 47.790  | 1.022      | *     |
| HL_93771.1                              | 3553       | 1699       | 47.819  | 0.989      | -     |
| HL_01926.3                              | 1328       | 636        | 47.892  | 0.998      | -     |
| HL_95049.1                              | 881        | 422        | 47.900  | 0.962      | -     |
| HL_49036.3                              | 29841      | 14309      | 47.951  | 0.966      | -     |
| HL_58223.1                              | 248        | 119        | 47.984  | 0.909      | -     |
| HL_08382.2                              | 19073      | 9160       | 48.026  | 0.960      | -     |
| HL_55718.1                              | 10322      | 4960       | 48.053  | 0.992      | -     |
| HL_39895.6                              | 7030       | 3382       | 48.108  | 0.970      | -     |
| HL_83865.1                              | 6534       | 3147       | 48.163  | 1.000      | -     |
| HL_34440.1                              | 2882       | 1389       | 48.196  | 0.887      | -     |
| HL_77692.1                              | 784        | 378        | 48.214  | 0.928      | -     |
| HL_66948.1                              | 605        | 292        | 48.264  | 1.008      | *     |
| HL_50059.1                              | 817        | 395        | 48.348  | 0.968      | -     |
| HL_66467.1                              | 3058       | 1480       | 48.398  | 0.923      | -     |
| HL_39486.1                              | 5418       | 2627       | 48.487  | 0.966      | -     |
| HL_45411.1                              | 884        | 429        | 48.529  | 0.931      | -     |
| HL_07915.1                              | 687        | 334        | 48.617  | 0.940      | -     |
| HL_61547.5                              | 20350      | 9907       | 48.683  | 0.959      | -     |
| HL_27271.2                              | 28303      | 13779      | 48.684  | 0.947      | -     |
| HL_67761.1                              | 5175       | 2523       | 48.754  | 0.968      | -     |
| HL_30366.1                              | 344        | 168        | 48.837  | 0.869      | -     |
| HL_23290.1                              | 1453       | 711        | 48.933  | 0.924      | -     |
| HL_86398.1                              | 94         | 46         | 48.936  | 0.951      | -     |
| HL_35200.1                              | 2002       | 981        | 49.001  | 0.939      | -     |
| HL_46570.1                              | 1206       | 591        | 49.005  | 0.965      | -     |
| HL_56824.2                              | 14644      | 7184       | 49.058  | 0.928      | -     |
| HL_91693.1                              | 14027      | 6889       | 49.112  | 0.922      | -     |
| HL_11547.2                              | 405        | 199        | 49.136  | 1.021      | *     |

Continued on next page

Table E – continued from previous page

| p-score > 0.9, 0.25 ≤ GC content ≤ 0.75 |            |            |         |            |       |
|-----------------------------------------|------------|------------|---------|------------|-------|
| ModelID                                 | # original | # shuffled | FDR (%) | Odds ratio | Stat. |
| $\bar{F}_{rnaz}$                        | 142 490    | 66 891     | 46.9%   |            |       |
| HL_62228.3                              | 8153       | 4033       | 49.466  | 0.930      | -     |
| HL_46175.2                              | 602        | 298        | 49.502  | 0.974      | -     |
| HL_24544.2                              | 2596       | 1289       | 49.653  | 0.997      | -     |
| HL_76585.1                              | 612        | 304        | 49.673  | 0.998      | -     |
| HL_19528.1                              | 654        | 325        | 49.694  | 0.941      | -     |
| HL_18781.4                              | 2372       | 1179       | 49.705  | 0.940      | -     |
| HL_62881.1                              | 629        | 313        | 49.762  | 0.926      | -     |
| HL_26495.1                              | 471        | 235        | 49.894  | 0.962      | -     |
| HL_96994.1                              | 14         | 7          | 50.000  | 0.766      | -     |
| HL_98577.1                              | 2          | 1          | 50.000  | Inf        | *     |
| HL_23195.1                              | 4          | 2          | 50.000  | 1.949      | *     |
| HL_59610.1                              | 2194       | 1098       | 50.046  | 0.872      | -     |
| HL_47337.1                              | 5519       | 2763       | 50.063  | 0.930      | -     |
| HL_91226.3                              | 1755       | 881        | 50.199  | 0.933      | -     |
| HL_79902.1                              | 245        | 123        | 50.204  | 0.960      | -     |
| HL_39872.2                              | 833        | 419        | 50.300  | 0.904      | -     |
| HL_33402.3                              | 2047       | 1033       | 50.464  | 0.931      | -     |
| HL_60200.1                              | 1349       | 681        | 50.482  | 0.972      | -     |
| HL_88311.2                              | 696        | 352        | 50.575  | 0.918      | -     |
| HL_32644.2                              | 419        | 212        | 50.597  | 0.941      | -     |
| HL_72498.12                             | 976        | 494        | 50.615  | 0.937      | -     |
| HL_52574.3                              | 5595       | 2834       | 50.652  | 0.930      | -     |
| HL_84768.1                              | 743        | 377        | 50.740  | 0.892      | -     |
| HL_67042.12                             | 18339      | 9327       | 50.859  | 0.891      | -     |
| HL_67000.1                              | 7827       | 3988       | 50.952  | 0.907      | -     |
| HL_82243.1                              | 1436       | 732        | 50.975  | 0.940      | -     |
| HL_64543.2                              | 1899       | 971        | 51.132  | 0.895      | -     |
| HL_70912.1                              | 772        | 395        | 51.166  | 0.903      | -     |
| HL_85534.1                              | 404        | 207        | 51.238  | 0.966      | -     |
| HL_88960.1                              | 495        | 254        | 51.313  | 0.970      | -     |
| HL_17537.1                              | 224        | 115        | 51.339  | 0.959      | -     |
| HL_64371.2                              | 35         | 18         | 51.429  | 0.731      | -     |
| HL_68733.1                              | 245        | 126        | 51.429  | 0.931      | -     |
| HL_84353.1                              | 11526      | 5938       | 51.518  | 0.873      | -     |
| HL_39942.2                              | 1119       | 577        | 51.564  | 0.897      | -     |
| HL_47784.2                              | 776        | 402        | 51.804  | 0.900      | -     |
| HL_06122.1                              | 2119       | 1103       | 52.053  | 0.882      | -     |
| HL_93263.1                              | 401        | 209        | 52.120  | 0.993      | -     |
| HL_52540.1                              | 5733       | 2989       | 52.137  | 0.889      | -     |
| HL_23129.1                              | 69         | 36         | 52.174  | 0.840      | -     |
| HL_04194.1                              | 380        | 199        | 52.368  | 0.923      | -     |
| HL_38898.1                              | 437        | 229        | 52.403  | 0.871      | -     |
| HL_76766.4                              | 10810      | 5666       | 52.414  | 0.866      | -     |
| HL_25124.2                              | 5652       | 2977       | 52.672  | 0.851      | -     |

Continued on next page

Table E – continued from previous page

| p-score > 0.9, 0.25 ≤ GC content ≤ 0.75 |            |            |         |            |       |
|-----------------------------------------|------------|------------|---------|------------|-------|
| ModelID                                 | # original | # shuffled | FDR (%) | Odds ratio | Stat. |
| $\bar{F}_{rnaz}$                        | 142 490    | 66 891     | 46.9%   |            |       |
| HL_76036.3                              | 14597      | 7690       | 52.682  | 0.863      | -     |
| HL_79038.1                              | 12683      | 6687       | 52.724  | 0.870      | -     |
| HL_86123.2                              | 1239       | 654        | 52.785  | 0.869      | -     |
| HL_29831.1                              | 8682       | 4586       | 52.822  | 0.863      | -     |
| HL_99779.1                              | 5568       | 2949       | 52.963  | 0.907      | -     |
| HL_38897.1                              | 166        | 88         | 53.012  | 0.933      | -     |
| HL_56775.1                              | 741        | 393        | 53.036  | 0.881      | -     |
| HL_65802.1                              | 327        | 174        | 53.211  | 0.863      | -     |
| HL_39422.1                              | 684        | 366        | 53.509  | 0.855      | -     |
| HL_48480.1                              | 811        | 435        | 53.637  | 0.854      | -     |
| HL_19221.2                              | 8074       | 4344       | 53.802  | 0.844      | -     |
| HL_97971.1                              | 8042       | 4363       | 54.253  | 0.838      | -     |
| HL_60203.1                              | 227        | 124        | 54.626  | 0.766      | -     |
| HL_49210.1                              | 951        | 522        | 54.890  | 0.813      | -     |
| HL_84289.1                              | 34         | 19         | 55.882  | 0.774      | -     |
| HL_57843.1                              | 4213       | 2356       | 55.922  | 0.855      | -     |
| HL_80492.2                              | 96         | 54         | 56.250  | 0.789      | -     |
| HL_78228.1                              | 825        | 465        | 56.364  | 0.872      | -     |
| HL_55272.1                              | 2785       | 1579       | 56.697  | 0.858      | -     |
| HL_85018.1                              | 101        | 58         | 57.426  | 0.860      | -     |
| HL_95720.1                              | 1323       | 764        | 57.748  | 0.790      | -     |
| HL_54751.2                              | 79         | 46         | 58.228  | 0.871      | -     |
| HL_37962.1                              | 309        | 180        | 58.252  | 0.753      | -     |
| HL_16770.1                              | 218        | 128        | 58.716  | 0.791      | -     |
| HL_24108.1                              | 76         | 45         | 59.211  | 0.877      | -     |
| HL_68579.1                              | 463        | 275        | 59.395  | 0.762      | -     |
| HL_69403.1                              | 208        | 125        | 60.096  | 0.841      | -     |
| HL_99633.1                              | 645        | 391        | 60.620  | 0.797      | -     |
| HL_38130.2                              | 37         | 23         | 62.162  | 0.580      | -     |
| HL_87136.2                              | 1572       | 990        | 62.977  | 0.734      | -     |
| HL_19132.1                              | 360        | 229        | 63.611  | 0.831      | -     |
| HL_41833.2                              | 68         | 45         | 66.176  | 0.621      | -     |
| HL_98233.1                              | 126        | 91         | 72.222  | 0.607      | -     |
| HL_65924.1                              | 4          | 3          | 75.000  | 0.325      | -     |
| HL_42553.1                              | 18         | 14         | 77.778  | 0.609      | -     |
| HL_91613.1                              | 12         | 10         | 83.333  | 0.536      | -     |
| HL_59182.1                              | 3          | 3          | 100.000 | 0.975      | -     |
| HL_20806.1                              | 1          | 1          | 100.000 | Inf        | *     |
| HL_25195.1                              | 3          | 3          | 100.000 | 0.487      | -     |
| HL_97784.1                              | 0          | 3          | Inf     | 0.000      | -     |
| HL_49492.1                              | 2          | 5          | 250.000 | 0.195      | -     |
| HL_25197.1                              | 0          | 1          | Inf     | 0.000      | -     |
| HL_19452.1                              | 0          | 2          | Inf     | 0.000      | -     |

Table F: False discovery rates (FDR) for individual JAR3D HL models with mean interior edit distance  $\leq 4$  and passed cutoff  $\geq 50$  in windows with p-score  $> 0.9$  and  $0.25 \leq \text{GC content} \leq 0.75$  of order R. Status “+” denotes models with adjusted p-value  $\leq 0.05$  and odds ratio  $\geq 1.0$  whereas “\*” denotes models with odds ratio  $\geq 1.0$ . Models assigned with “-” are neither enriched nor occur at higher rates in the original data. Colored rows have an  $\text{FDR} \leq \hat{F}_{rnaz}$  and original window count  $\geq 6$ . The table is sorted in ascending order according to FDR.

| <b>p-score <math>&gt; 0.9</math>, <math>0.25 \leq \text{GC content} \leq 0.75</math></b> |            |            |         |            |       |
|------------------------------------------------------------------------------------------|------------|------------|---------|------------|-------|
| ModelID                                                                                  | # original | # shuffled | FDR (%) | Odds ratio | Stat. |
| $\hat{F}_{rnaz}$                                                                         | 142 475    | 66 891     | 46.9%   |            |       |
| HL_45358.1                                                                               | 0          | 0          | 0.000   | 0.000      | -     |
| HL_10116.1                                                                               | 0          | 0          | 0.000   | 0.000      | -     |
| HL_70420.2                                                                               | 1          | 0          | 0.000   | 0.000      | -     |
| HL_90102.1                                                                               | 0          | 0          | 0.000   | 0.000      | -     |
| HL_19399.1                                                                               | 0          | 0          | 0.000   | 0.000      | -     |
| HL_24473.3                                                                               | 5          | 0          | 0.000   | Inf        | *     |
| HL_42436.1                                                                               | 2          | 0          | 0.000   | Inf        | *     |
| HL_33451.1                                                                               | 10         | 1          | 10.000  | 3.373      | *     |
| HL_73465.1                                                                               | 35         | 5          | 14.286  | 3.373      | *     |
| HL_44467.1                                                                               | 51         | 11         | 21.569  | 1.796      | *     |
| HL_44390.1                                                                               | 25         | 6          | 24.000  | 1.349      | *     |
| HL_55202.1                                                                               | 16         | 4          | 25.000  | 2.249      | *     |
| HL_20920.1                                                                               | 12         | 3          | 25.000  | 1.285      | *     |
| HL_25175.1                                                                               | 8          | 2          | 25.000  | 1.927      | *     |
| HL_56809.1                                                                               | 119        | 36         | 30.252  | 1.355      | *     |
| HL_05361.1                                                                               | 749        | 253        | 33.778  | 1.423      | +     |
| HL_87223.1                                                                               | 212        | 73         | 34.434  | 1.048      | *     |
| HL_65071.1                                                                               | 1285       | 463        | 36.031  | 1.286      | +     |
| HL_26579.1                                                                               | 884        | 320        | 36.199  | 1.256      | +     |
| HL_87554.1                                                                               | 2439       | 888        | 36.408  | 1.308      | +     |
| HL_90542.1                                                                               | 1238       | 455        | 36.753  | 1.371      | +     |
| HL_98833.3                                                                               | 1040       | 388        | 37.308  | 1.135      | *     |
| HL_13707.2                                                                               | 99         | 37         | 37.374  | 1.163      | *     |
| HL_68435.1                                                                               | 1161       | 437        | 37.640  | 1.198      | *     |
| HL_66877.1                                                                               | 207        | 78         | 37.681  | 1.231      | *     |
| HL_75759.4                                                                               | 7488       | 2838       | 37.901  | 1.240      | *     |
| HL_08203.1                                                                               | 63         | 24         | 38.095  | 1.285      | *     |
| HL_97499.1                                                                               | 2665       | 1018       | 38.199  | 1.236      | *     |
| HL_30008.1                                                                               | 2681       | 1025       | 38.232  | 1.231      | *     |
| HL_74559.1                                                                               | 3592       | 1392       | 38.753  | 1.210      | *     |
| HL_00721.1                                                                               | 1839       | 713        | 38.771  | 1.168      | *     |
| HL_45018.3                                                                               | 1126       | 438        | 38.899  | 1.178      | *     |
| HL_35865.1                                                                               | 7623       | 2972       | 38.987  | 1.195      | *     |
| HL_10378.1                                                                               | 2097       | 821        | 39.151  | 1.241      | *     |

Continued on next page



Table F – continued from previous page

| p-score > 0.9, 0.25 ≤ GC content ≤ 0.75 |            |            |         |            |       |
|-----------------------------------------|------------|------------|---------|------------|-------|
| ModelID                                 | # original | # shuffled | FDR (%) | Odds ratio | Stat. |
| $\hat{F}_{rnaz}$                        | 142 475    | 66 891     | 46.9%   |            |       |
| HL_05113.1                              | 102        | 40         | 39.216  | 1.325      | *     |
| HL_17790.1                              | 2921       | 1150       | 39.370  | 1.160      | *     |
| HL_42969.1                              | 33         | 13         | 39.394  | 1.095      | *     |
| HL_27429.3                              | 308        | 122        | 39.610  | 1.034      | *     |
| HL_59604.1                              | 2897       | 1149       | 39.662  | 1.185      | *     |
| HL_06643.3                              | 7062       | 2807       | 39.748  | 1.173      | *     |
| HL_01418.1                              | 2024       | 808        | 39.921  | 1.146      | *     |
| HL_24711.1                              | 954        | 381        | 39.937  | 1.135      | *     |
| HL_17723.4                              | 2344       | 937        | 39.974  | 1.141      | *     |
| HL_44522.1                              | 220        | 88         | 40.000  | 1.180      | *     |
| HL_23195.1                              | 5          | 2          | 40.000  | 2.409      | *     |
| HL_42677.2                              | 5962       | 2390       | 40.087  | 1.164      | *     |
| HL_59225.1                              | 2700       | 1084       | 40.148  | 1.152      | *     |
| HL_35619.2                              | 1955       | 788        | 40.307  | 1.158      | *     |
| HL_78420.1                              | 695        | 282        | 40.576  | 1.137      | *     |
| HL_72273.1                              | 994        | 406        | 40.845  | 1.164      | *     |
| HL_46489.2                              | 1206       | 493        | 40.879  | 1.138      | *     |
| HL_63304.1                              | 17         | 7          | 41.176  | 1.687      | *     |
| HL_74505.1                              | 5541       | 2283       | 41.202  | 1.133      | *     |
| HL_66880.1                              | 80         | 33         | 41.250  | 1.234      | *     |
| HL_15603.2                              | 109        | 45         | 41.284  | 1.084      | *     |
| HL_63941.1                              | 5787       | 2391       | 41.317  | 1.138      | *     |
| HL_99584.1                              | 1712       | 712        | 41.589  | 1.153      | *     |
| HL_33640.1                              | 856        | 356        | 41.589  | 1.036      | *     |
| HL_75850.1                              | 4978       | 2083       | 41.844  | 1.139      | *     |
| HL_27397.1                              | 467        | 196        | 41.970  | 1.148      | *     |
| HL_20028.1                              | 212        | 89         | 41.981  | 1.109      | *     |
| HL_18587.1                              | 1048       | 440        | 41.985  | 1.167      | *     |
| HL_24707.1                              | 2214       | 930        | 42.005  | 1.106      | *     |
| HL_41827.1                              | 1561       | 657        | 42.088  | 1.091      | *     |
| HL_57923.1                              | 332        | 140        | 42.169  | 1.110      | *     |
| HL_86115.1                              | 5215       | 2202       | 42.224  | 1.121      | *     |
| HL_33277.1                              | 2064       | 872        | 42.248  | 1.099      | *     |
| HL_03785.1                              | 4807       | 2036       | 42.355  | 1.119      | *     |
| HL_53789.1                              | 2815       | 1195       | 42.451  | 1.062      | *     |
| HL_73972.1                              | 1188       | 505        | 42.508  | 1.094      | *     |
| HL_34027.2                              | 9247       | 3939       | 42.598  | 1.099      | *     |
| HL_99207.1                              | 2267       | 968        | 42.700  | 1.171      | *     |
| HL_52116.1                              | 1013       | 434        | 42.843  | 1.072      | *     |
| HL_94578.1                              | 518        | 222        | 42.857  | 1.021      | *     |
| HL_00090.1                              | 925        | 397        | 42.919  | 1.174      | *     |
| HL_78361.1                              | 799        | 343        | 42.929  | 1.108      | *     |
| HL_30731.1                              | 2040       | 885        | 43.382  | 1.075      | *     |
| HL_53015.1                              | 732        | 318        | 43.443  | 1.075      | *     |

Continued on next page

Table F – continued from previous page

| p-score > 0.9, 0.25 ≤ GC content ≤ 0.75 |            |            |         |            |       |
|-----------------------------------------|------------|------------|---------|------------|-------|
| ModelID                                 | # original | # shuffled | FDR (%) | Odds ratio | Stat. |
| $\bar{F}_{rnaz}$                        | 142 475    | 66 891     | 46.9%   |            |       |
| HL_06997.2                              | 23         | 10         | 43.478  | 0.903      | -     |
| HL_48254.1                              | 1735       | 755        | 43.516  | 1.071      | *     |
| HL_65347.1                              | 666        | 290        | 43.544  | 1.035      | *     |
| HL_50312.1                              | 5522       | 2414       | 43.716  | 1.059      | *     |
| HL_17008.1                              | 32         | 14         | 43.750  | 1.397      | *     |
| HL_90579.3                              | 575        | 252        | 43.826  | 1.078      | *     |
| HL_91872.1                              | 586        | 257        | 43.857  | 1.108      | *     |
| HL_21675.3                              | 9587       | 4214       | 43.955  | 1.055      | *     |
| HL_12706.1                              | 2097       | 923        | 44.015  | 1.038      | *     |
| HL_75579.2                              | 20137      | 8899       | 44.192  | 1.071      | *     |
| HL_82288.1                              | 733        | 324        | 44.202  | 1.029      | *     |
| HL_42077.2                              | 18816      | 8321       | 44.223  | 1.064      | *     |
| HL_38138.1                              | 1116       | 494        | 44.265  | 1.092      | *     |
| HL_93567.1                              | 2377       | 1053       | 44.300  | 1.047      | *     |
| HL_74465.5                              | 1135       | 504        | 44.405  | 1.037      | *     |
| HL_57514.2                              | 11751      | 5219       | 44.413  | 1.087      | *     |
| HL_34108.2                              | 12515      | 5559       | 44.419  | 1.050      | *     |
| HL_74686.1                              | 339        | 151        | 44.543  | 1.078      | *     |
| HL_58601.1                              | 4785       | 2132       | 44.556  | 1.056      | *     |
| HL_94697.1                              | 193        | 86         | 44.560  | 0.930      | -     |
| HL_30128.1                              | 1097       | 490        | 44.667  | 1.089      | *     |
| HL_48116.2                              | 11297      | 5047       | 44.676  | 1.066      | *     |
| HL_42094.1                              | 841        | 376        | 44.709  | 1.040      | *     |
| HL_97270.3                              | 3481       | 1558       | 44.757  | 1.046      | *     |
| HL_36842.1                              | 2507       | 1123       | 44.795  | 1.067      | *     |
| HL_93530.1                              | 1251       | 561        | 44.844  | 1.062      | *     |
| HL_57217.1                              | 564        | 253        | 44.858  | 1.017      | *     |
| HL_66174.1                              | 1239       | 556        | 44.875  | 1.057      | *     |
| HL_78507.1                              | 2591       | 1163       | 44.886  | 1.060      | *     |
| HL_68081.3                              | 1987       | 892        | 44.892  | 1.023      | *     |
| HL_23182.1                              | 1488       | 668        | 44.892  | 1.070      | *     |
| HL_42345.1                              | 1338       | 601        | 44.918  | 1.084      | *     |
| HL_33875.1                              | 842        | 379        | 45.012  | 1.062      | *     |
| HL_62970.1                              | 306        | 138        | 45.098  | 1.064      | *     |
| HL_98523.2                              | 6055       | 2731       | 45.103  | 1.069      | *     |
| HL_19905.3                              | 10049      | 4537       | 45.149  | 1.067      | *     |
| HL_13786.1                              | 3652       | 1652       | 45.235  | 1.005      | *     |
| HL_48039.2                              | 23198      | 10524      | 45.366  | 1.049      | *     |
| HL_29196.1                              | 784        | 356        | 45.408  | 0.967      | -     |
| HL_65249.1                              | 11230      | 5100       | 45.414  | 1.019      | *     |
| HL_84888.1                              | 568        | 258        | 45.423  | 1.114      | *     |
| HL_96915.1                              | 774        | 353        | 45.607  | 1.014      | *     |
| HL_95716.1                              | 7160       | 3269       | 45.656  | 1.061      | *     |
| HL_11376.1                              | 30689      | 14026      | 45.704  | 1.029      | *     |

Continued on next page

Table F – continued from previous page

| p-score > 0.9, 0.25 ≤ GC content ≤ 0.75 |            |            |         |            |       |
|-----------------------------------------|------------|------------|---------|------------|-------|
| ModelID                                 | # original | # shuffled | FDR (%) | Odds ratio | Stat. |
| $\bar{F}_{rnaz}$                        | 142 475    | 66 891     | 46.9%   |            |       |
| HL_82538.1                              | 27251      | 12472      | 45.767  | 1.018      | *     |
| HL_58083.2                              | 369        | 169        | 45.799  | 0.935      | -     |
| HL_18156.2                              | 334        | 153        | 45.808  | 1.086      | *     |
| HL_62967.1                              | 12214      | 5598       | 45.833  | 1.024      | *     |
| HL_85044.1                              | 26         | 12         | 46.154  | 0.920      | -     |
| HL_68697.2                              | 15592      | 7222       | 46.319  | 0.999      | -     |
| HL_62880.1                              | 3960       | 1849       | 46.692  | 1.000      | *     |
| HL_76679.1                              | 4629       | 2163       | 46.727  | 0.992      | -     |
| HL_78731.1                              | 1119       | 523        | 46.738  | 1.027      | *     |
| HL_87844.2                              | 2985       | 1399       | 46.868  | 0.987      | -     |
| HL_93771.1                              | 3620       | 1699       | 46.934  | 1.011      | *     |
| HL_08382.2                              | 19516      | 9160       | 46.936  | 0.989      | -     |
| HL_55718.1                              | 10559      | 4960       | 46.974  | 1.020      | *     |
| HL_80459.3                              | 18948      | 8913       | 47.039  | 0.991      | -     |
| HL_72543.2                              | 389        | 183        | 47.044  | 1.012      | *     |
| HL_49036.3                              | 30402      | 14309      | 47.066  | 0.992      | -     |
| HL_11509.2                              | 537        | 253        | 47.114  | 0.978      | -     |
| HL_83865.1                              | 6670       | 3147       | 47.181  | 1.024      | *     |
| HL_21545.1                              | 2818       | 1334       | 47.339  | 1.003      | *     |
| HL_39895.6                              | 7142       | 3382       | 47.354  | 0.986      | -     |
| HL_19226.1                              | 665        | 315        | 47.368  | 0.982      | -     |
| HL_28676.1                              | 1748       | 828        | 47.368  | 1.005      | *     |
| HL_34440.1                              | 2932       | 1389       | 47.374  | 0.911      | -     |
| HL_66467.1                              | 3124       | 1480       | 47.375  | 0.946      | -     |
| HL_82294.3                              | 3672       | 1741       | 47.413  | 1.028      | *     |
| HL_66948.1                              | 615        | 292        | 47.480  | 1.032      | *     |
| HL_61547.5                              | 20837      | 9907       | 47.545  | 0.988      | -     |
| HL_50059.1                              | 830        | 395        | 47.590  | 0.987      | -     |
| HL_67761.1                              | 5294       | 2523       | 47.658  | 0.995      | -     |
| HL_27271.2                              | 28887      | 13779      | 47.700  | 0.973      | -     |
| HL_01926.3                              | 1333       | 636        | 47.712  | 1.000      | -     |
| HL_95049.1                              | 884        | 422        | 47.738  | 0.968      | -     |
| HL_56824.2                              | 15047      | 7184       | 47.744  | 0.957      | -     |
| HL_91693.1                              | 14404      | 6889       | 47.827  | 0.952      | -     |
| HL_86398.1                              | 96         | 46         | 47.917  | 0.964      | -     |
| HL_39486.1                              | 5464       | 2627       | 48.078  | 0.977      | -     |
| HL_77692.1                              | 785        | 378        | 48.153  | 0.922      | -     |
| HL_23290.1                              | 1474       | 711        | 48.236  | 0.944      | -     |
| HL_07915.1                              | 692        | 334        | 48.266  | 0.952      | -     |
| HL_35200.1                              | 2031       | 981        | 48.301  | 0.957      | -     |
| HL_62228.3                              | 8344       | 4033       | 48.334  | 0.954      | -     |
| HL_58223.1                              | 246        | 119        | 48.374  | 0.909      | -     |
| HL_47337.1                              | 5687       | 2763       | 48.584  | 0.960      | -     |
| HL_46570.1                              | 1215       | 591        | 48.642  | 0.975      | -     |

Continued on next page

Table F – continued from previous page

| p-score > 0.9, 0.25 ≤ GC content ≤ 0.75 |            |            |         |            |       |
|-----------------------------------------|------------|------------|---------|------------|-------|
| ModelID                                 | # original | # shuffled | FDR (%) | Odds ratio | Stat. |
| $\bar{F}_{rnaz}$                        | 142 475    | 66 891     | 46.9%   |            |       |
| HL_45411.1                              | 881        | 429        | 48.695  | 0.922      | -     |
| HL_19528.1                              | 662        | 325        | 49.094  | 0.956      | -     |
| HL_30366.1                              | 342        | 168        | 49.123  | 0.863      | -     |
| HL_18781.4                              | 2395       | 1179       | 49.228  | 0.949      | -     |
| HL_46175.2                              | 605        | 298        | 49.256  | 0.975      | -     |
| HL_11547.2                              | 404        | 199        | 49.257  | 1.030      | *     |
| HL_24544.2                              | 2607       | 1289       | 49.444  | 0.998      | -     |
| HL_67000.1                              | 8058       | 3988       | 49.491  | 0.936      | -     |
| HL_59610.1                              | 2212       | 1098       | 49.638  | 0.888      | -     |
| HL_67042.12                             | 18764      | 9327       | 49.707  | 0.917      | -     |
| HL_79902.1                              | 247        | 123        | 49.798  | 0.959      | -     |
| HL_91226.3                              | 1769       | 881        | 49.802  | 0.941      | -     |
| HL_64371.2                              | 36         | 18         | 50.000  | 0.749      | -     |
| HL_96994.1                              | 14         | 7          | 50.000  | 0.757      | -     |
| HL_98577.1                              | 2          | 1          | 50.000  | Inf        | *     |
| HL_32644.2                              | 424        | 212        | 50.000  | 0.950      | -     |
| HL_62881.1                              | 625        | 313        | 50.080  | 0.921      | -     |
| HL_76585.1                              | 605        | 304        | 50.248  | 0.976      | -     |
| HL_60200.1                              | 1354       | 681        | 50.295  | 0.972      | -     |
| HL_84353.1                              | 11802      | 5938       | 50.314  | 0.899      | -     |
| HL_88311.2                              | 699        | 352        | 50.358  | 0.920      | -     |
| HL_52574.3                              | 5627       | 2834       | 50.364  | 0.942      | -     |
| HL_26495.1                              | 466        | 235        | 50.429  | 0.941      | -     |
| HL_33402.3                              | 2048       | 1033       | 50.439  | 0.941      | -     |
| HL_72498.12                             | 979        | 494        | 50.460  | 0.940      | -     |
| HL_52540.1                              | 5911       | 2989       | 50.567  | 0.921      | -     |
| HL_88960.1                              | 502        | 254        | 50.598  | 0.987      | -     |
| HL_47784.2                              | 792        | 402        | 50.758  | 0.920      | -     |
| HL_38898.1                              | 451        | 229        | 50.776  | 0.893      | -     |
| HL_68733.1                              | 248        | 126        | 50.806  | 0.944      | -     |
| HL_84768.1                              | 742        | 377        | 50.809  | 0.902      | -     |
| HL_85534.1                              | 407        | 207        | 50.860  | 0.975      | -     |
| HL_39872.2                              | 823        | 419        | 50.911  | 0.894      | -     |
| HL_64543.2                              | 1905       | 971        | 50.971  | 0.897      | -     |
| HL_76766.4                              | 11087      | 5666       | 51.105  | 0.893      | -     |
| HL_82243.1                              | 1432       | 732        | 51.117  | 0.932      | -     |
| HL_79038.1                              | 13061      | 6687       | 51.198  | 0.899      | -     |
| HL_70912.1                              | 771        | 395        | 51.232  | 0.896      | -     |
| HL_76036.3                              | 14994      | 7690       | 51.287  | 0.891      | -     |
| HL_17537.1                              | 224        | 115        | 51.339  | 0.932      | -     |
| HL_23129.1                              | 70         | 36         | 51.429  | 0.864      | -     |
| HL_25124.2                              | 5786       | 2977       | 51.452  | 0.875      | -     |
| HL_29831.1                              | 8885       | 4586       | 51.615  | 0.887      | -     |
| HL_39942.2                              | 1116       | 577        | 51.703  | 0.891      | -     |

Continued on next page

Table F – continued from previous page

| p-score > 0.9, 0.25 ≤ GC content ≤ 0.75 |            |            |         |            |       |
|-----------------------------------------|------------|------------|---------|------------|-------|
| ModelID                                 | # original | # shuffled | FDR (%) | Odds ratio | Stat. |
| $\bar{F}_{rnaz}$                        | 142 475    | 66 891     | 46.9%   |            |       |
| HL_06122.1                              | 2125       | 1103       | 51.906  | 0.885      | -     |
| HL_04194.1                              | 383        | 199        | 51.958  | 0.927      | -     |
| HL_99779.1                              | 5660       | 2949       | 52.102  | 0.923      | -     |
| HL_86123.2                              | 1253       | 654        | 52.195  | 0.881      | -     |
| HL_93263.1                              | 400        | 209        | 52.250  | 0.991      | -     |
| HL_56775.1                              | 752        | 393        | 52.261  | 0.890      | -     |
| HL_38897.1                              | 168        | 88         | 52.381  | 0.964      | -     |
| HL_19221.2                              | 8263       | 4344       | 52.572  | 0.868      | -     |
| HL_97971.1                              | 8262       | 4363       | 52.808  | 0.865      | -     |
| HL_39422.1                              | 682        | 366        | 53.666  | 0.853      | -     |
| HL_48480.1                              | 809        | 435        | 53.770  | 0.852      | -     |
| HL_65802.1                              | 321        | 174        | 54.206  | 0.833      | -     |
| HL_84289.1                              | 35         | 19         | 54.286  | 0.822      | -     |
| HL_60203.1                              | 226        | 124        | 54.867  | 0.753      | -     |
| HL_49210.1                              | 951        | 522        | 54.890  | 0.823      | -     |
| HL_57843.1                              | 4281       | 2356       | 55.034  | 0.869      | -     |
| HL_78228.1                              | 829        | 465        | 56.092  | 0.877      | -     |
| HL_55272.1                              | 2796       | 1579       | 56.474  | 0.858      | -     |
| HL_24108.1                              | 79         | 45         | 56.962  | 0.922      | -     |
| HL_95720.1                              | 1328       | 764        | 57.530  | 0.798      | -     |
| HL_85018.1                              | 100        | 58         | 58.000  | 0.851      | -     |
| HL_80492.2                              | 93         | 54         | 58.065  | 0.746      | -     |
| HL_37962.1                              | 306        | 180        | 58.824  | 0.742      | -     |
| HL_54751.2                              | 78         | 46         | 58.974  | 0.876      | -     |
| HL_16770.1                              | 217        | 128        | 58.986  | 0.777      | -     |
| HL_68579.1                              | 464        | 275        | 59.267  | 0.767      | -     |
| HL_69403.1                              | 209        | 125        | 59.809  | 0.836      | -     |
| HL_99633.1                              | 652        | 391        | 59.969  | 0.809      | -     |
| HL_38130.2                              | 37         | 23         | 62.162  | 0.551      | -     |
| HL_87136.2                              | 1584       | 990        | 62.500  | 0.739      | -     |
| HL_19132.1                              | 365        | 229        | 62.740  | 0.838      | -     |
| HL_41833.2                              | 67         | 45         | 67.164  | 0.614      | -     |
| HL_98233.1                              | 124        | 91         | 73.387  | 0.600      | -     |
| HL_65924.1                              | 4          | 3          | 75.000  | 0.321      | -     |
| HL_91613.1                              | 13         | 10         | 76.923  | 0.578      | -     |
| HL_42553.1                              | 17         | 14         | 82.353  | 0.562      | -     |
| HL_59182.1                              | 3          | 3          | 100.000 | 0.964      | -     |
| HL_20806.1                              | 1          | 1          | 100.000 | Inf        | *     |
| HL_25195.1                              | 3          | 3          | 100.000 | 0.482      | -     |
| HL_49492.1                              | 3          | 5          | 166.667 | 0.289      | -     |
| HL_97784.1                              | 0          | 3          | Inf     | 0.000      | -     |
| HL_25197.1                              | 0          | 1          | Inf     | 0.000      | -     |
| HL_19452.1                              | 0          | 2          | Inf     | 0.000      | -     |
